# Supplementary material
Source: publisher figshare collection journal article supplement (https://gsapubs.figshare.com/articles/dataset/_/19104638)

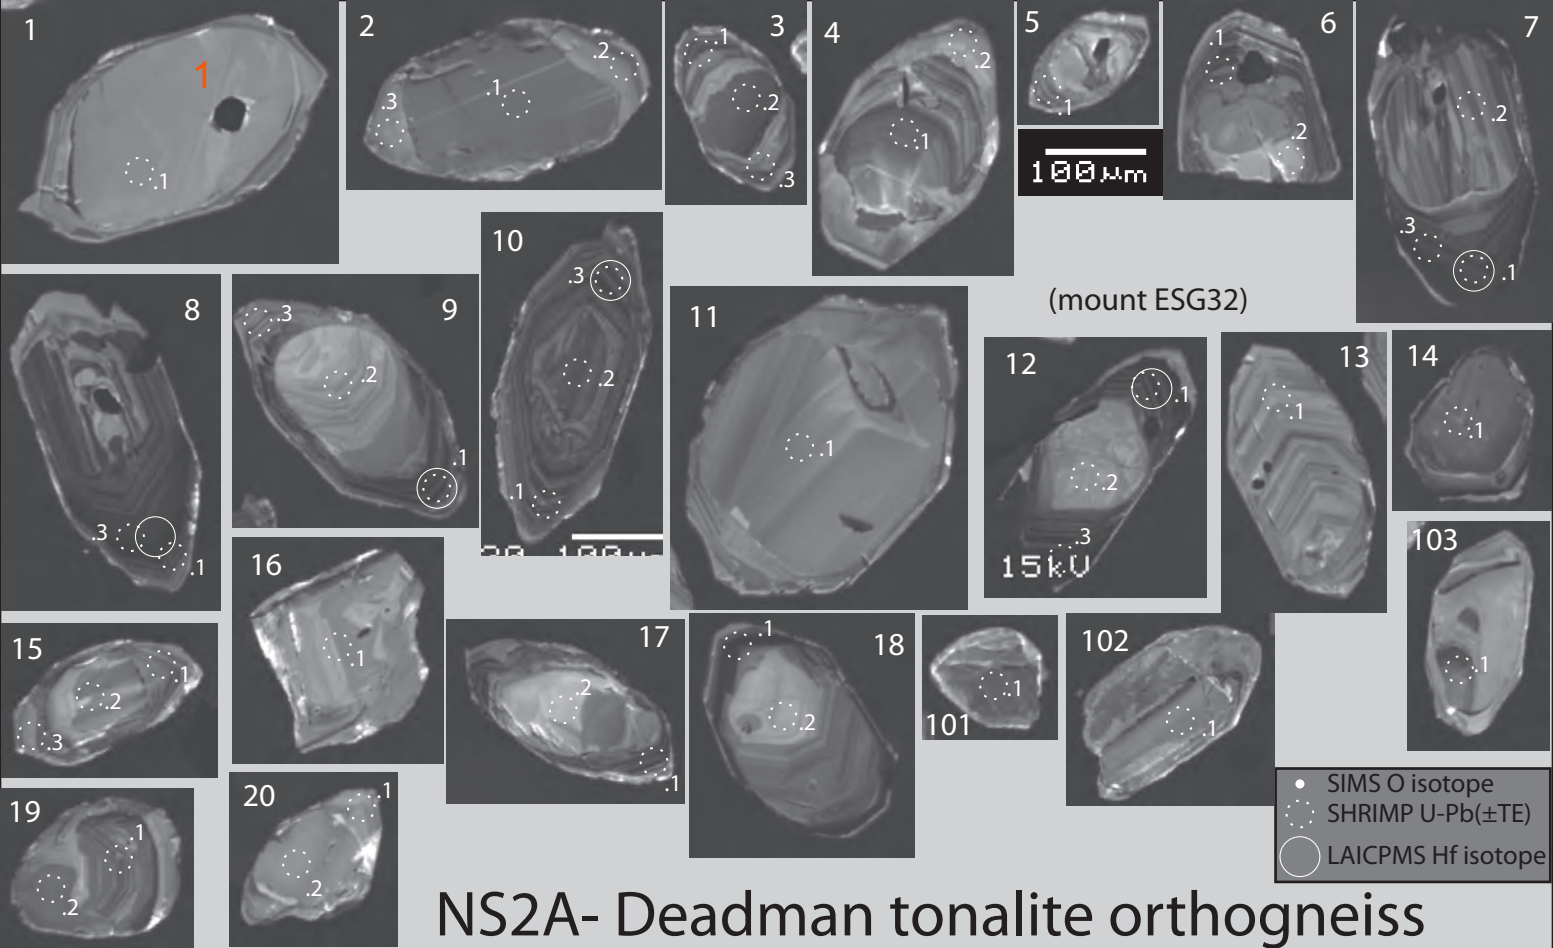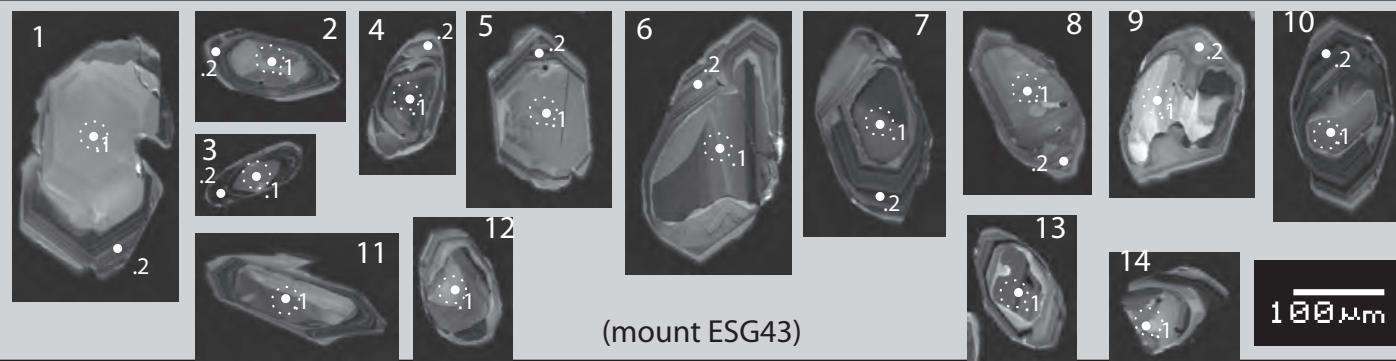

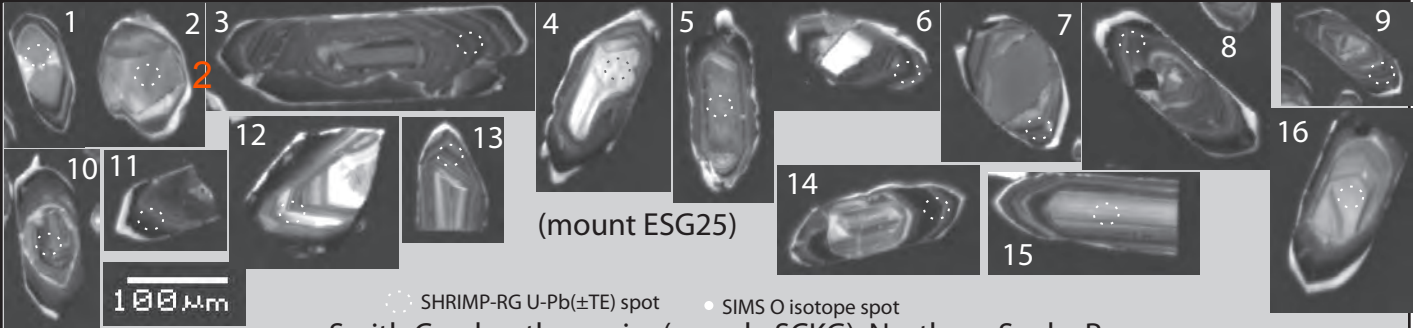

Smith Creek orthogneiss (sample SCKG), Northern Snake Range

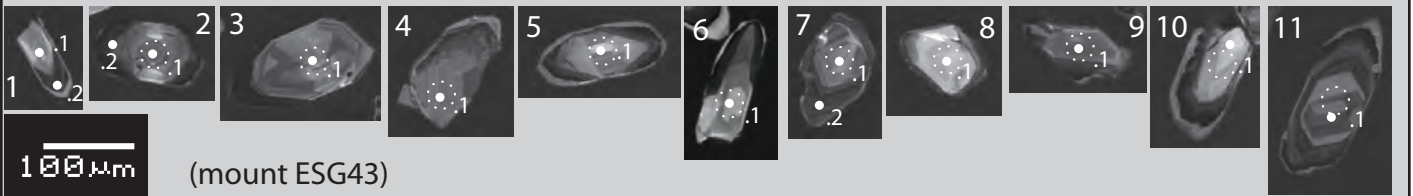

(mount ESG43)

# Horse Canyon orthogneiss, Northern Snake Range (sample 20-210)

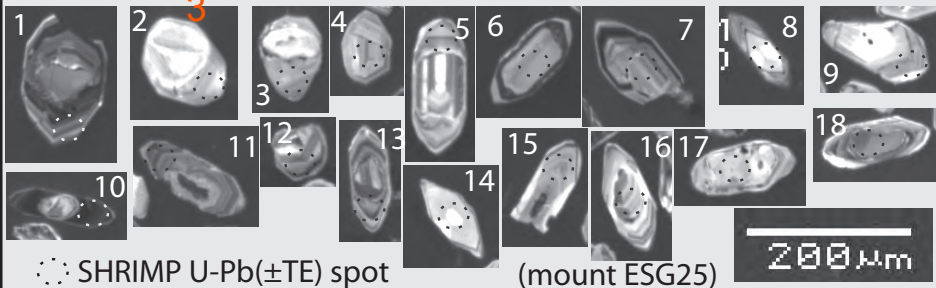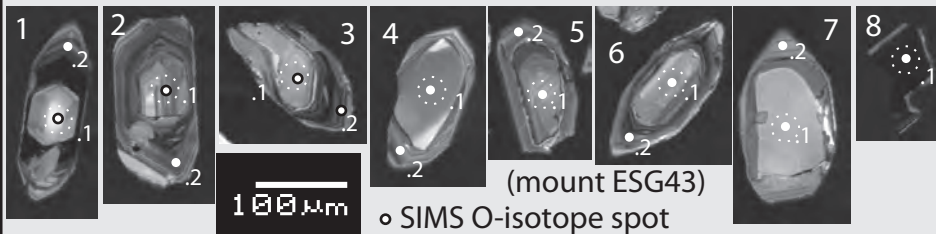

4

## Lexington Creek pluton, Southern Snake Range (SS1)

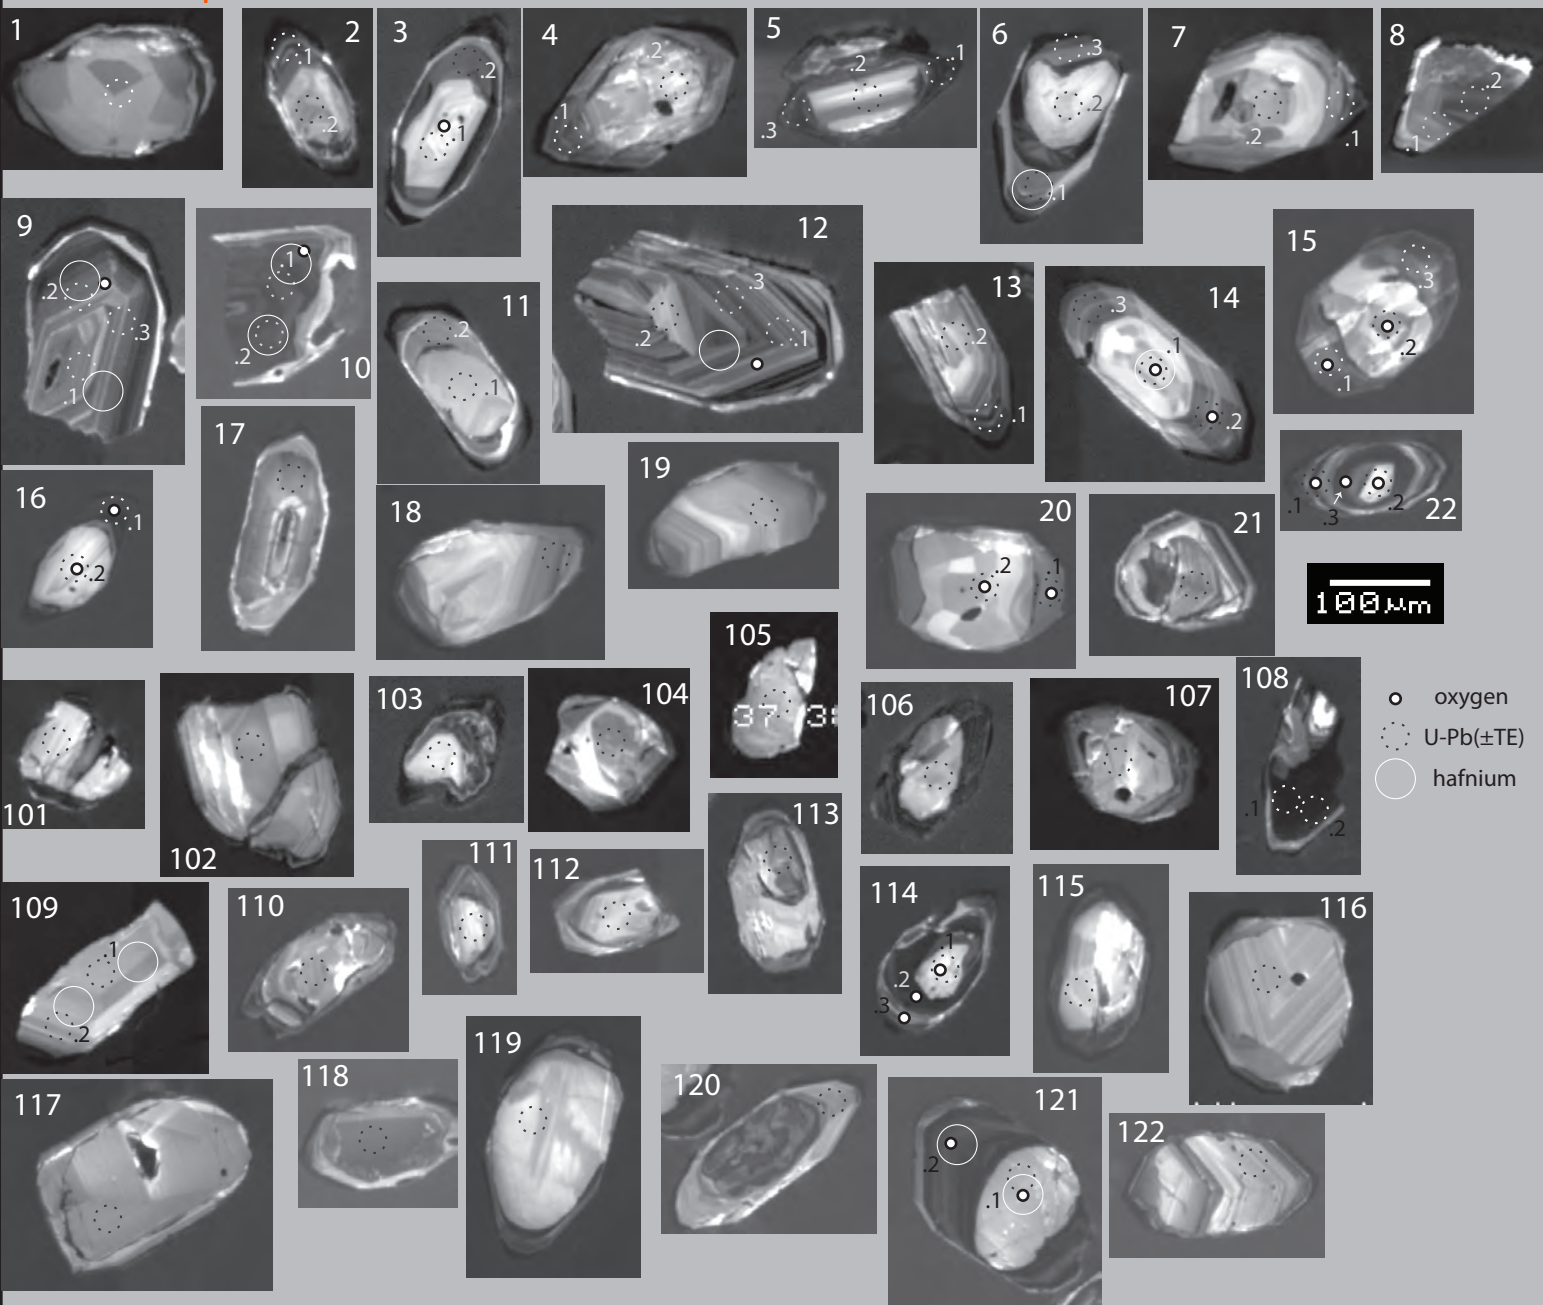



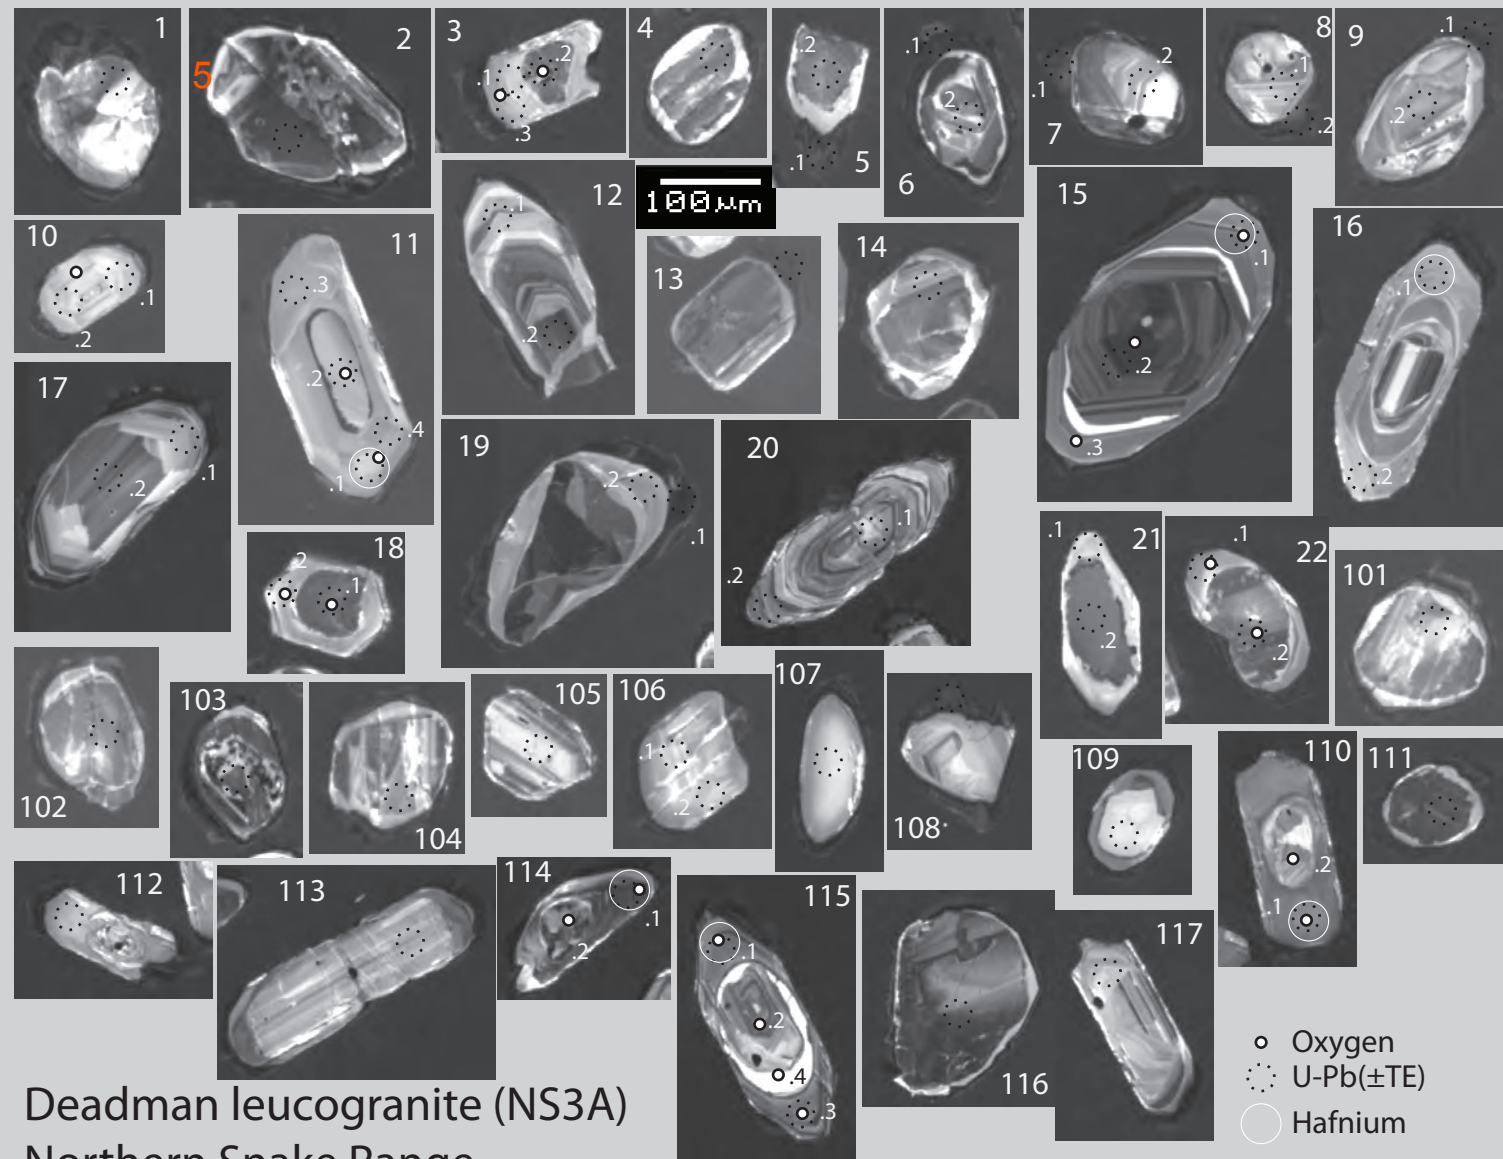

Deadman leucogranite (NS3A)  
 Northern Snake Range

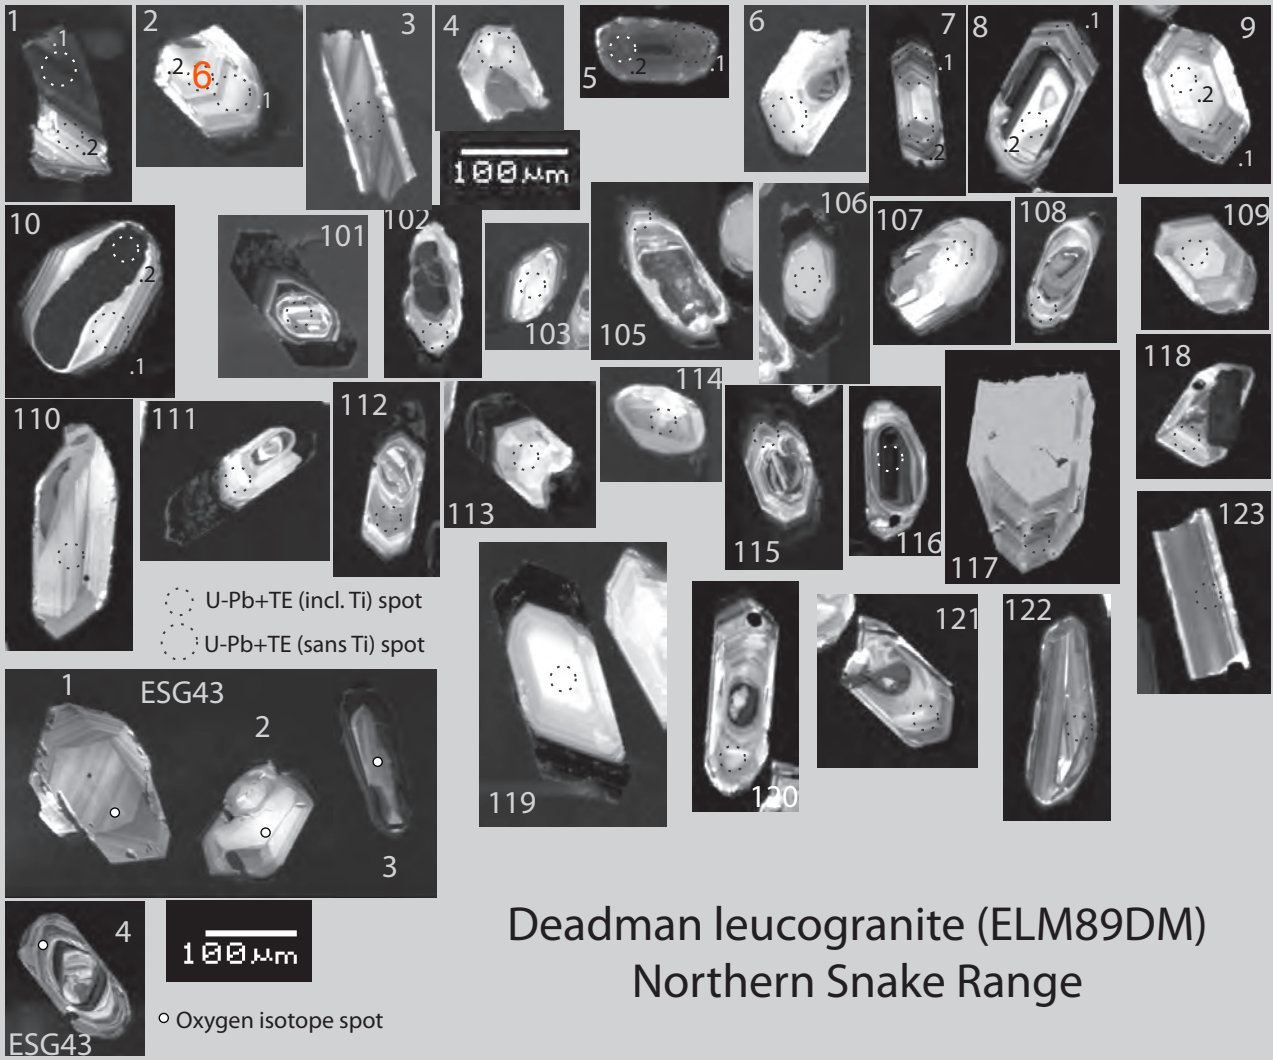



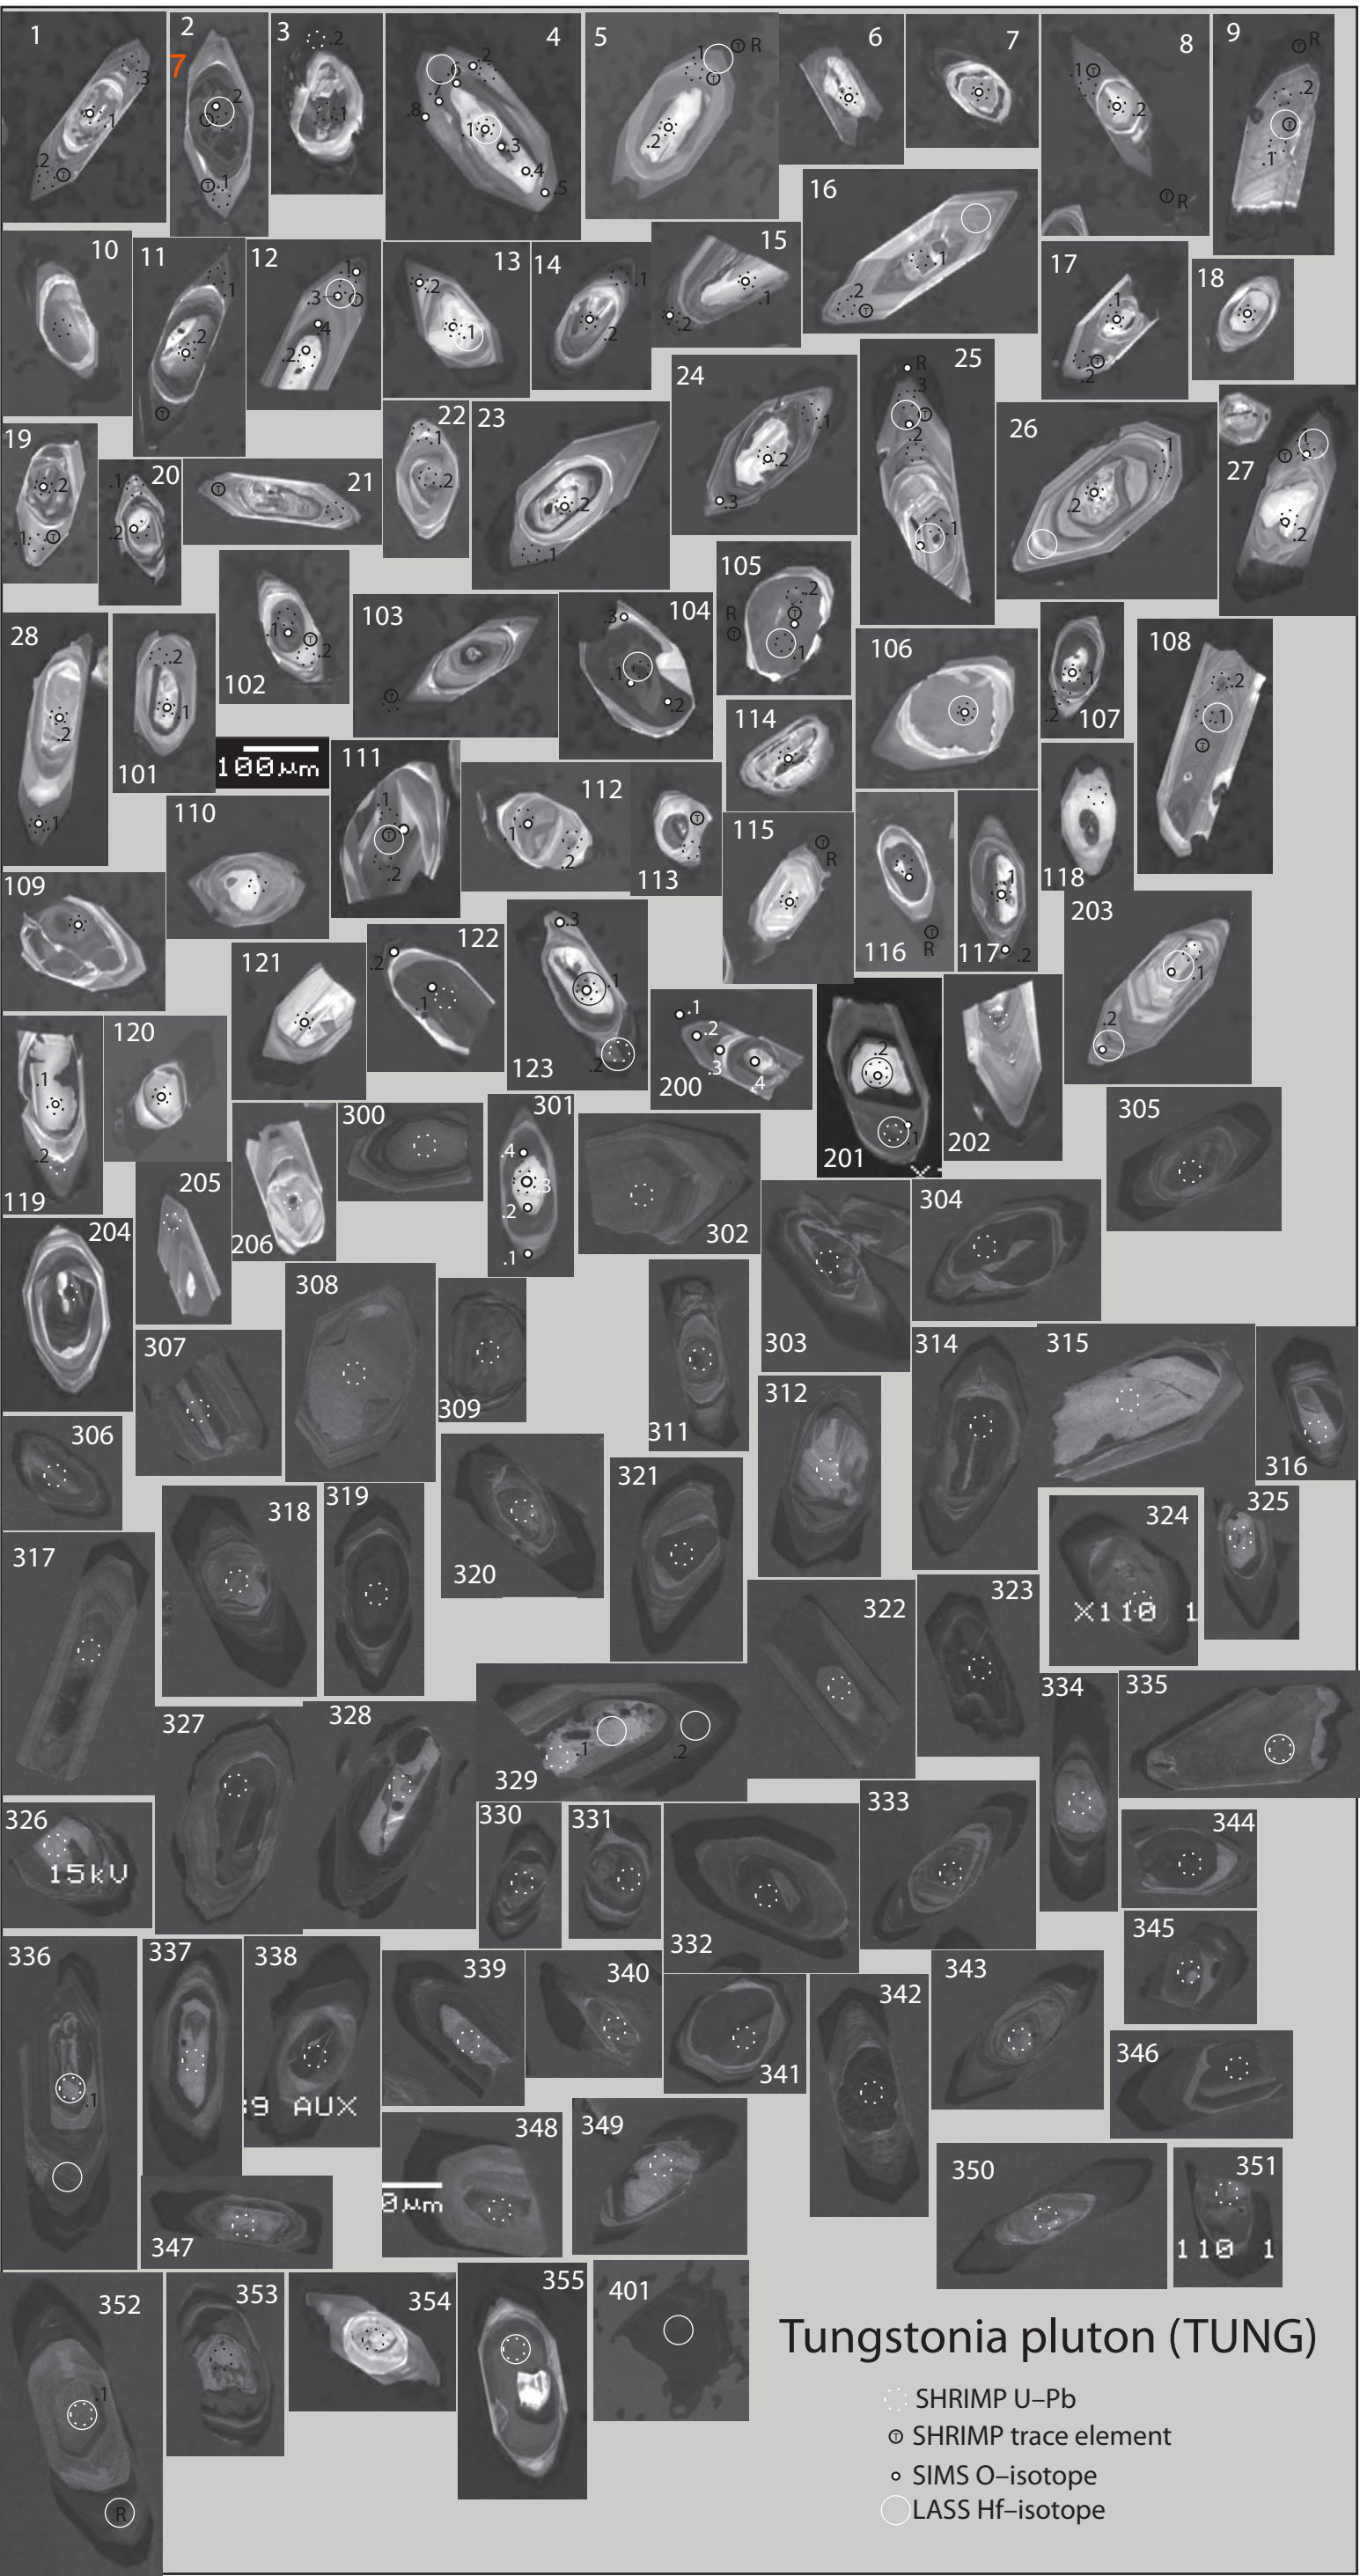

Supplement: Supplementary file 1 [file 1]
