# Supplementary material
Source: publisher figshare collection journal article supplement (https://gsapubs.figshare.com/articles/dataset/_/19104638)
Supplement: Supplementary file 1 [file 1]

## Sheet: Table S1 SUMAC
Spot ID			U-Th-Pb isotope ratios														Trace element concentrations																		U-Th-Pb ages											Age interpretation
Spot Name	Mount	Analysis date/time	204/206	Total 238 /206	1s err (%)	Total 207 /206	1s err (%)	4corr 238 /206*	1s err (%)	4corr 207* /206*	1s err (%)	4corr 207* /235	1s err (%)	4corr 206* /238	1s err (%)	err corr	Sc (ppm)	48Ti (ppm)	49Ti (ppm)	Fe (ppm)	Y (ppm)	La (ppm)	Ce (ppm)	Nd (ppm)	Sm (ppm)	Eu (ppm)	Gd (ppm)	Dy (ppm)	Er (ppm)	Yb (ppm)	Hf (ppm)	206Pb* (ppm)	Th (ppm)	U (ppm)	204corr 206Pb/ 238U Age	1s err (Ma)	207corr 206Pb/ 238U Age	1s err (Ma)	208corr 206Pb/ 238U Age	1s err (Ma)	204corr 207Pb/ 206Pb Age	1s err (Ma)	204corr 208Pb/ 232Th Age	1s err (Ma)	% Discor-dant	Best age (Ma)	1s err (Ma)	alpha dosage
91500- Secondary Standard (1065 Ma, Wiedenbeck et al., 2004).
91500-1.1	ESG43	2014-06-02, 15:36	5.52269e-05	5.64711	2.28042	0.074504	1.84119	5.65241	2.28235	0.073717	2.14737	1.79819	3.13374	0.176916	2.28235	0.728316	---	---	---	---	---	---	---	---	---	---	---	---	---	---	5607.04	11.7645	24.2266	66.4353	1050.1	22.1168	1050.87	23.1585	1050.88	23.3966	1032.85	43.3926	1035.27	48.202	-0.0174436
91500-1.6	ESG43	2014-06-03, 08:29	6.59669e-05	5.59086	2.90749	0.0746201	2.23283	5.59713	2.90965	0.0736801	2.59934	1.81504	3.90162	0.178663	2.90965	0.745755	---	---	---	---	---	---	---	---	---	---	---	---	---	---	5930.38	12.0521	24.9974	67.3818	1059.67	28.4318	1060.91	29.7988	1062.57	30.139	1031.84	52.5337	1005.09	66.617	-0.0281778
91500-1.5	ESG43	2014-06-03, 08:14	-6.7101e-05	5.50418	1.72788	0.0759702	2.25341	5.49793	1.73161	0.0769226	2.54389	1.92911	3.07731	0.181887	1.73161	0.562702	---	---	---	---	---	---	---	---	---	---	---	---	---	---	5952.78	11.6729	22.8551	64.2496	1077.27	17.1788	1075.34	18.0303	1082.46	18.2364	1118.32	50.7524	974.894	66.302	0.0384289
91500-1.2	ESG43	2014-06-02, 18:19	5.76446e-05	5.43893	1.63259	0.0754008	2.08037	5.44424	1.63551	0.0745803	2.37591	1.88881	2.88442	0.18368	1.63551	0.567016	---	---	---	---	---	---	---	---	---	---	---	---	---	---	5660.54	12.2645	24.4372	66.7056	1087.05	16.3606	1088.48	17.2348	1088.87	17.4669	1056.34	47.8412	1052.15	60.6049	-0.0304302
91500-1.3	ESG43	2014-06-02, 20:45	0	5.32382	2.97203	0.0735911	3.47365	5.32382	2.97203	0.0735911	3.47365	1.90591	4.57157	0.187835	2.97203	0.650112	---	---	---	---	---	---	---	---	---	---	---	---	---	---	5751.48	12.5099	23.9796	66.6003	1109.64	30.2965	1113.45	32.0464	1105.81	32.0747	1029.39	70.2299	1184.11	70.7987	-0.0816509
91500-1.4	ESG43	2014-06-03, 00:40	0	5.29694	2.97039	0.0755882	2.14557	5.29694	2.97039	0.0755882	2.14557	1.96757	3.66424	0.188788	2.97039	0.810641	---	---	---	---	---	---	---	---	---	---	---	---	---	---	5809.93	12.2594	23.2735	64.9373	1114.81	30.409	1116.34	32.013	1119.27	32.1144	1083.31	43.0289	1027.01	66.9951	-0.0304858
12EGNS2A- Deformed biotite granite- Deadman Canyon, Northern Snake Range (39.312232,-114.207557)
Mesozoic domains
NS2A-1.1	ESG43	2014-06-02, 21:29	0	66.9503	3.6602	0.0597153	12.8385	66.9503	3.6602	0.0597153	12.8385	0.12298	13.35	0.0149364	3.6602	0.274172	---	---	---	---	---	---	---	---	---	---	---	---	---	---	8187	0.390912	14.1774	26.1717	95.5745	3.47242	94.2024	3.54541	97.0421	4.17693	592.331	278.322	79.6074	19.0939	n/a	94.2024	3.54541	9.10286e+12
ns2a-10.1	ESG32	2012-10-06, 20:34	3.11753e-05	62.2094	0.881588	0.047889	1.73805	62.2445	0.883384	0.0474297	2.00551	0.105063	2.19144	0.0160657	0.883384	0.403106	---	---	---	---	1256.04	---	12.6325	0.198544	0.79415	1.13102	14.5619		224.074	429.966	12348	11.7424	103.366	730.491	102.743	0.90042	102.826	0.90762	102.711	0.921047	69.8803	47.7081	104.168	3.57395	n/a	102.826	0.90762
NS2A-10.3	ESG32	2013-03-31, 04:59	-3.7857e-05	61.158	2.80416	0.0482816	2.39485	61.1162	2.80499	0.0488384	2.62598	0.110181	3.84236	0.0163623	2.80499	0.730018	---	7.00744	6.83791	45.7138	1795.8	0.0028199	16.0511	0.203272	1.25502	1.18031	20.0847	139.749	327.429	636.737	14353.2	21.6714	139.18	1325.38	104.624	2.91102	104.534	2.91894	104.382	2.95836	139.059	61.6687	119.246	7.83346	n/a	104.534	2.91894
ns2a-12.1	ESG32	2012-10-06, 21:34	1.66456e-05	61.6419	1.55624	0.0493914	1.25328	61.6605	1.55653	0.0491466	1.3548	0.109898	2.06356	0.0162178	1.55653	0.754295	---	---	---	---	1897.69	0.0164097	10.311	0.171937	1.09735	1.316	20.3634		330.988	620.924	12659.6	22.3237	129.698	1376.08	103.708	1.60134	103.577	1.60506	103.746	1.6259	153.813	31.7297	101.149	3.55561	n/a	103.577	1.60506
NS2A-12.3	ESG32	2013-03-31, 05:21	5.21218e-05	61.8391	3.15648	0.0490157	2.022	61.8973	3.15719	0.0482485	2.34395	0.107476	3.93216	0.0161558	3.15719	0.802913	---	9.74786	10.0405	67.1729	3491.4	0.00742483	17.4333	0.14793	1.38218	1.45767	29.3766	251.169	658.653	1298.34	16100.8	31.4834	101.345	1946.91	103.315	3.23583	103.296	3.24524	103.486	3.26492	110.445	55.3383	82.2483	10.2061	n/a	103.296	3.24524
ns2a-15.1	ESG32	2012-10-06, 22:47	0.000288739	64.2646	2.36352	0.0528083	2.92184	64.6012	2.3828	0.04856	5.99889	0.103643	6.4548	0.0154796	2.3828	0.369152	---	---	---	---	376.041	---	2.32667	0.0891828	0.189507	0.247827	3.28415		72.5128	154.891	12501.4	3.69843	12.6614	237.678	99.0233	2.3415	98.9576	2.33424	99.4697	2.35411	125.615	141.23	45.5226	35.9825	n/a	98.9576	2.33424
NS2A-15.3	ESG32	2013-03-31, 05:42	0.000354637	63.7035	1.14059	0.0463489	7.78502	64.1139	1.30998	0.0410831	15.6387	0.0883513	15.6935	0.0155972	1.30998	0.0834727	---	1.95073	1.7357	11.2451	295.878	0.00849976	2.10876	0.0331843	0.170203	0.143385	2.79484	21.0258	56.9312	138.836	15904	2.16096	6.45647	137.661	99.7703	1.29691	100.616	1.22406	100.125	1.15997	-283.549	398.396	51.3773	88.1944	n/a	100.616	1.22406
ns2a-17.1	ESG32	2012-10-06, 23:42	-8.39053e-05	61.8215	2.25611	0.0489854	1.64436	61.728	2.2578	0.0502175	2.1367	0.112169	3.10856	0.0162001	2.2578	0.726317	---	---	---	---	1141.76	---	9.14122	0.0640175	0.706416	0.913038	12.192		193.118	357.787	11487.1	13.0023	98.5667	803.824	103.596	2.32029	103.329	2.3208	103.409	2.36016	204.061	49.5828	113.178	4.79089	n/a	103.329	2.3208
ns2a-18.1	ESG32	2012-10-07, 00:00	3.1367e-05	63.2251	1.38607	0.0488875	1.24037	63.2609	1.38665	0.048426	1.42288	0.105547	1.9868	0.0158075	1.38665	0.69793	---	---	---	---	1926.15	0.017227	7.77934	0.1083	0.796711	0.839187	14.7889		346.317	680.371	15867.7	25.4657	87.7959	1610.07	101.105	1.39103	101.06	1.39532	101.152	1.40362	119.104	33.5388	95.6011	6.23941	n/a	101.06	1.39532
NS2A-19.2	ESG32	2013-01-07, 09:05	0	62.3526	1.79231	0.0494892	5.61552	62.3526	1.79231	0.0494892	5.61552	0.109435	5.89461	0.0160378	1.79231	0.304059	---	---	---	---	295.304	---	0.429599	0.0072602	0.0133349	0.0388306	0.46351	13.3038	63.5574	187.531	17908	3.70932	0.616974	231.286	102.566	1.82376	102.391	1.85809	102.484	1.82597	170.056	131.124	299.455	172.56	n/a	102.391	1.85809
NS2A-2.2	ESG32	2013-01-07, 04:46	0	64.0399	2.27561	0.0488222	5.88743	64.0399	2.27561	0.0488222	5.88743	0.105116	6.31191	0.0156153	2.27561	0.360527	---	---	---	---	289.947	---	1.70693	0.0215284	0.124539	0.146367	2.11233	20.7998	53.6044	128.869	12908	2.82249	6.09277	180.752	99.8847	2.25547	99.7886	2.28586	99.6526	2.27473	138.278	138.281	143.888	34.4685	n/a	99.7886	2.28586
NS2A-2.3	ESG32	2013-03-31, 02:48	0	64.2825	1.24431	0.0576466	8.50807	64.2825	1.24431	0.0576466	8.50807	0.123647	8.59858	0.0155563	1.24431	0.144711	---	3.22766	2.82789	13.5095	342.768	0.00492697	3.75013	0.0415489	0.24751	0.214657	3.62426	26.0673	65.7738	154.872	16299.1	2.78775	13.2464	179.204	99.5105	1.22871	98.3428	1.35511	98.9928	1.27947	515.402	186.863	143.988	25.999	0.809192	98.3428	1.35511
ns2a-20.1	ESG32	2012-10-07, 00:36	-0.000865663	66.755	3.83247	0.0508651	4.59915	65.728	3.90893	0.0633706	10.3745	0.132935	11.0865	0.0152142	3.90893	0.352586	---	---	---	---	280.213	0.0300035	2.5042	0.0523951	0.15001	0.213811	2.65055		48.5321	113.263	11649.7	1.48786	8.28103	99.3218	97.3386	3.77632	95.5115	3.65229	95.7809	3.69494	719.767	220.211	215.533	58.0819	0.867302	95.5115	3.65229
NS2A-3.1	ESG43	2014-06-02, 18:48	0.000592614	70.9359	1.3732	0.0505189	5.80004	71.7029	1.57174	0.0417263	16.6518	0.0802371	16.7258	0.0139464	1.57174	0.0939706	---	---	---	---	---	---	---	---	---	---	---	---	---	---	6966.49	1.91895	94.1099	136.122	89.2834	1.39363	89.9469	1.2709	90.2092	2.15476	-244.129	420.885	81.6017	13.9028	n/a	89.9469	1.2709	4.66046e+13
ns2a-3.1	ESG32	2012-10-06, 17:12	0.000454289	64.4024	1.28674	0.0476433	3.04423	64.9348	1.33881	0.0408962	8.25449	0.0868375	8.36236	0.0154001	1.33881	0.1601	---	---	---	---	398.547	0.0166764	4.38835	0.116488	0.406468	0.432789	5.44224		80.5159	168.704	12372.5	4.33793	32.3087	279.373	98.5185	1.30895	99.3727	1.28406	99.2575	1.29281	-295.178	210.773	58.1267	20.2188	n/a	99.3727	1.28406
NS2A-3.3	ESG32	2013-03-31, 03:12	0	60.8538	0.966598	0.0461766	5.92433	60.8538	0.966598	0.0461766	5.92433	0.104625	6.00267	0.0164328	0.966598	0.161028	---	3.26947	3.2236	17.0896	554.478	0.00270585	6.95145	0.106891	0.438495	0.421896	6.48992	41.7979	104.423	234.575	13910.8	4.41907	32.3603	268.917	105.072	1.00739	105.323	1.07138	105.277	1.04757	5.8033	142.645	94.3181	10.9648	n/a	105.323	1.07138
NS2A-4.2	ESG32	2013-01-07, 05:31	0	64.8806	3.04574	0.0398405	10.856	64.8806	3.04574	0.0398405	10.856	0.0846665	11.2752	0.0154129	3.04574	0.270128	---	---	---	---	210.246	---	7.27775	0.123677	0.459811	0.291658	4.18937	17.8704	36.6115	80.3754	9916.79	1.06085	20.8254	68.8283	98.6003	2.98025	99.5823	3.06162	99.2594	3.21387	-362.412	280.983	85.2441	15.041	n/a	99.5823	3.06162
ns2a-5.1	ESG32	2012-10-06, 17:49	0.000330858	62.1625	0.972415	0.046708	2.86271	62.5359	1.01776	0.0417995	6.72681	0.09216	6.80337	0.0159908	1.01776	0.149597	---	---	---	---	626.049	0.0358542	8.03016	0.137747	0.526584	0.705498	8.42159		110.299	240.459	12256.5	4.79542	49.8453	298.095	102.268	1.03263	103.051	1.01068	102.991	1.03139	-239.703	169.875	75.1517	12.5983	n/a	103.051	1.01068
NS2A-5.1	ESG43	2014-06-02, 21:44	0	62.204	1.68144	0.0425908	9.05772	62.204	1.68144	0.0425908	9.05772	0.0944058	9.21246	0.0160761	1.68144	0.182518	---	---	---	---	---	---	---	---	---	---	---	---	---	---	8922.17	1.16694	58.7097	72.5886	102.809	1.71496	103.499	1.79711	104.189	2.55013	-192.563	226.617	93.2018	11.354	n/a	103.499	1.79711	2.93114e+13
ns2a-6.1	ESG32	2012-10-06, 18:35	0.000235942	64.6493	1.76589	0.051918	2.05174	64.9258	1.77622	0.0484459	3.90356	0.102882	4.28867	0.0154022	1.77622	0.414166	---	---	---	---	1628.1	0.0171952	13.5496	0.336313	1.25734	1.34973	21.088		279.918	563.796	12088	7.49943	65.987	484.833	98.5321	1.73684	98.4792	1.73479	98.6491	1.77173	120.077	91.9945	93.1173	8.87757	n/a	98.4792	1.73479
ns2a-7.1	ESG32	2012-10-06, 18:53	0	61.5795	1.60395	0.0505985	1.76673	61.5795	1.60395	0.0505985	1.76673	0.113293	2.38621	0.0162392	1.60395	0.672176	---	---	---	---	2492.6	0.0166348	14.0781	0.174296	1.32033	1.46144	21.2652		461.648	877.592	12182.6	11.2995	55.9043	695.819	103.843	1.65225	103.529	1.65539	103.878	1.67431	221.576	40.8668	101.107	4.94446	n/a	103.529	1.65539
NS2A-7.3	ESG32	2013-03-31, 03:33	8.4171e-05	58.9756	1.38151	0.052165	3.42544	59.0654	1.38986	0.0509301	4.27127	0.118889	4.49171	0.0169304	1.38986	0.309428	---	13.2189	13.1104	33.8214	3514.55	0.0140475	22.0343	0.311189	1.73351	1.53787	28.7113	254.573	674.235	1356.95	15397.4	15.47	69.9034	912.351	108.227	1.49164	107.867	1.50046	108.466	1.50693	236.665	98.53	88.3498	15.924	n/a	107.867	1.50046
ns2a-8.1	ESG32	2012-10-06, 19:27	4.33852e-05	62.1059	1.4533	0.0487066	1.45874	62.1546	1.45435	0.0480679	1.75287	0.106631	2.27765	0.0160889	1.45435	0.638531	---	---	---	---	3657.68	---	13.0081	0.181797	1.07352	1.60922	26.6884		684.703	1277.91	13834.2	17.5072	53.1182	1087.3	102.89	1.48451	102.894	1.48994	102.905	1.49607	101.582	41.452	100.995	7.78683	n/a	102.894	1.48994
NS2A-8.3	ESG32	2013-03-31, 03:54	-7.378e-05	60.0169	1.61025	0.0470819	3.38143	59.9371	1.61574	0.048168	3.99573	0.110806	4.31004	0.0166842	1.61574	0.374877	---	16.2035	15.8248	47.6909	4156.07	0.00732384	20.2735	0.254158	1.68168	1.58454	31.2495	294.654	792.766	1598.76	15687.5	17.7068	62.7101	1062.71	106.666	1.70926	106.666	1.72045	106.547	1.71948	106.502	94.4047	119.523	19.1974	n/a	106.666	1.72045
ns2a-9.1	ESG32	2012-10-06, 20:15	-6.28842e-05	61.6839	1.19502	0.0494703	1.40781	61.614	1.19681	0.0503935	1.73833	0.112771	2.11048	0.0162301	1.19681	0.56708	---	---	---	---	1432.37	---	10.1287	0.0803569	0.831939	1.13967	15.4405		255.533	468.51	12491.2	18.2508	113.113	1125.78	103.786	1.23218	103.497	1.23324	103.624	1.24922	212.175	40.2787	114.006	5.21435	n/a	103.497	1.23324
NS2A-9.3	ESG32	2013-03-31, 04:16	0	60.04	1.68837	0.0504814	5.52054	60.04	1.68837	0.0504814	5.52054	0.115929	5.77295	0.0166556	1.68837	0.292462	---	7.06035	6.58123	18.8234	763.494	0.0143565	18.9015	0.37351	1.4151	0.941655	14.5172	62.448	134.272	289.663	14043.5	5.59421	105.508	335.877	106.484	1.78308	106.184	1.81913	106.473	1.9168	216.212	127.822	106.712	7.79992	n/a	106.184	1.81913
Pre-Mesozoic domains																															17
ns2a-1.1	ESG32	2012-10-06, 16:14	-9.1788e-05	4.57249	1.31712	0.086757	1.30615	4.56493	1.32058	0.0880421	1.5359	2.65924	2.02557	0.219061	1.32058	0.651955	---	---	---	---	889.875	0.03314	9.60246	0.995406	2.51646	0.764887	22.5601		157.462	249.371	8004.36	12.0838	21.6426	55.2532	1276.91	15.2976	1269.5	16.2935	1274.6	16.16	1382.57	29.5063	1317.63	31.7498	0.0817803	1382.57	29.5063
NS2A-10.1	ESG43	2014-06-02, 17:49	-7.92689e-06	2.22735	1.67407	0.180485	0.519936	2.22703	1.67413	0.180583	0.522391	11.1803	1.75374	0.449029	1.67413	0.954606	---	---	---	---	---	---	---	---	---	---	---	---	---	---	11418.1	77.1426	78.4555	171.824	2390.93	33.4429	2292.5	41.9315	2385.07	35.6086	2657.51	8.65975	2490.02	58.224	0.13735	2657.51	8.65975	2217459967334191
NS2A-10.2	ESG32	2013-01-07, 06:48	0	4.38879	1.67678	0.108505	1.34215	4.38879	1.67678	0.108505	1.34215	3.40885	2.14778	0.227853	1.67678	0.780704	---	---	---	---	2870.59	---	15.5042	3.57963	7.19653	1.8629	67.0552	291.792	503.486	761.063	9169.53	95.9859	95.4235	421.262	1323.24	20.0587	1285.1	21.0146	1317.45	20.7554	1773.68	24.4974	1503.55	38.527	0.275459	1773.68	24.4974
NS2A-101.1	ESG32	2013-01-07, 05:01	-8.80231e-06	2.07854	2.44553	0.181017	0.51204	2.07821	2.44558	0.181126	0.515143	12.0169	2.49925	0.481183	2.44558	0.978527	---	---	---	---	1715.14	---	12.0403	2.35011	4.32761	1.18626	37.1365	160.21	302.624	519.924	8903.64	119.72	170.645	248.843	2532.42	51.2156	2474.76	69.9998	2528.95	56.1493	2662.49	8.53556	2571	65.6247	0.0705078	2662.49	8.53556
NS2A-102.1	ESG32	2013-01-07, 07:18	0	2.19368	1.95201	0.195443	0.798175	2.19368	1.95201	0.195443	0.798175	12.2843	2.10889	0.455855	1.95201	0.925609	---	---	---	---	444.932	---	11.4237	1.29013	1.53328	0.795491	10.1489	36.6657	78.2952	186.74	8565.15	60.2904	108.276	132.258	2421.23	39.4012	2275.37	48.4881	2433.01	44.1261	2787.8	13.0722	2314.37	57.4172	0.183813	2787.8	13.0722
NS2A-103.1	ESG32	2013-01-07, 08:04	-2.49637e-05	4.30217	2.29154	0.0895216	1.17381	4.30023	2.29198	0.0898703	1.23139	2.88154	2.60183	0.232546	2.29198	0.880913	---	---	---	---	2447.81	---	42.6895	5.24505	9.90505	0.435203	79.4798	291.942	430.179	622.774	7706.19	48.5183	121.368	208.734	1347.83	27.8763	1342.1	29.8918	1340.35	30.523	1421.94	23.5288	1434.43	44.0203	0.056149	1421.94	23.5288
ns2a-11.1	ESG32	2012-10-06, 21:16	-4.25264e-05	5.23108	1.20198	0.0783155	1.14881	5.22707	1.2032	0.0789179	1.26039	2.0817	1.74249	0.191312	1.2032	0.690505	---	---	---	---	1107.39	0.11352	8.58824	3.1492	4.11493	1.63864	30.9453		177.024	283.147	8797.39	17.8975	84.8933	93.6233	1128.48	12.4558	1126.25	13.1465	1130.95	14.5861	1169.22	24.9583	1111.38	22.7795	0.0367438	1169.22	24.9583
NS2A-11.1	ESG43	2014-06-02, 17:20	2.02642e-05	4.05837	1.19692	0.0906988	0.806912	4.05986	1.1972	0.090416	0.839425	3.07069	1.46216	0.246314	1.1972	0.818786	---	---	---	---	---	---	---	---	---	---	---	---	---	---	11385	69.1695	69.3216	280.715	1419.44	15.2527	1418.26	16.5636	1421.06	15.8398	1433.5	16.014	1372.49	41.5391	0.0106349	1433.5	16.014	1597361600095373
NS2A-12.1	ESG43	2014-06-02, 18:33	2.80471e-05	5.39283	1.40059	0.0786273	2.72449	5.39556	1.4015	0.0782297	2.78653	1.99911	3.11913	0.185338	1.4015	0.449325	---	---	---	---	---	---	---	---	---	---	---	---	---	---	9109.4	19.9359	23.8645	107.511	1096.07	14.1265	1093.16	15.0777	1096.13	14.6779	1151.85	55.3193	1094.26	55.3465	0.0509472	1151.85	55.3193	4.73912e+14
NS2A-12.2	ESG32	2013-01-07, 07:03	-4.28228e-05	4.79811	1.74084	0.102422	1.02085	4.7944	1.7417	0.10301	1.09149	2.9624	2.05544	0.208577	1.7417	0.847358	---	---	---	---	962.762	---	5.53562	0.604513	1.43017	0.318095	18.0951	90.8567	177.072	331.287	11079	54.2635	91.5605	260.362	1221.23	19.3768	1188.03	20.0669	1224.63	20.4679	1678.24	20.1623	1154.43	49.2071	0.292098	1678.24	20.1623
NS2A-13.1	ESG43	2014-06-02, 19:03	0	6.55204	1.20073	0.0766205	1.07119	6.55204	1.20073	0.0766205	1.07119	1.61239	1.6091	0.152624	1.20073	0.746214	---	---	---	---	501.636	0.0164602	9.02286	0.310439	0.915554	0.0630261	7.86932		90.2236	174.15	12308.6	39.2946	59.323	257.46	915.656	10.2495	907.823	10.5859	913.893	10.6773	1110.46	21.3959	967.52	37.5287	0.182481	1110.46	21.3959	1091133258971220
ns2a-13.1	ESG32	2012-10-06, 22:11	-2.0818e-05	5.59998	1.19153	0.076248	1.13779	5.59788	1.19212	0.0765438	1.19702	1.88533	1.68938	0.178639	1.19212	0.705656	---	---	---	---	---	---	---	---	---	---	---	---	---	---	10009	17.9824	32.7453	100.701	1059.54	11.6475	1057.14	12.2269	1057.93	12.2135	1108.46	23.9162	1093.14	15.3242	0.0462969	1108.46	23.9162	4.34295e+14
NS2A-14.1	ESG43	2014-06-02, 19:32	-1.31558e-05	7.60696	1.14917	0.0740882	1.00328	7.60515	1.14941	0.0742757	1.03184	1.3466	1.54462	0.13149	1.14941	0.744141	---	---	---	---	1064.53	0.032895	19.7403	0.321689	1.43909	0.279901	18.9402		196.292	329.259	10774.3	49.9341	56.0117	379.847	796.359	8.61063	788.075	8.80839	795.612	8.82383	1048.09	20.8028	830.671	34.0846	0.248085	1048.09	20.8028	1.48317e+15
ns2a-14.1	ESG32	2012-10-06, 22:29	3.09098e-05	5.3562	1.71393	0.0796389	0.786845	5.35919	1.71423	0.0792012	0.853583	2.03767	1.91499	0.186595	1.71423	0.895164	---	---	---	---	---	---	---	---	---	---	---	---	---	---	11715.2	36.471	90.5905	195.346	1102.9	17.3774	1099.02	18.2275	1100.12	18.6093	1176.31	16.8852	1143	10.45	0.0657047	1176.31	16.8852
NS2A-15.2	ESG32	2013-01-07, 07:48	-4.40979e-05	4.19221	2.87247	0.0884916	1.55891	4.18888	2.87357	0.0891082	1.69437	2.93306	3.33591	0.238727	2.87357	0.861405	---	---	---	---	1366.98	---	21.7792	5.40136	8.05977	2.43584	49.7208	156.153	223.869	333.001	9442.34	27.7035	88.4497	116.139	1380.08	35.6998	1378.04	38.5219	1375.91	40.2264	1405.65	32.4473	1416.18	51.8362	0.0196449	1405.65	32.4473
ns2a-16.1	ESG32	2012-10-06, 23:05	7.45342e-05	5.50757	2.18598	0.0774341	1.51397	5.51499	2.18805	0.0763748	1.82396	1.90944	2.84858	0.181324	2.18805	0.768121	---	---	---	---	969.423	0.0979585	9.40178	3.30725	4.92831	0.656397	32.4093		163.706	247.392	8477.73	9.50799	37.8919	52.3659	1074.2	21.6502	1072.72	22.7182	1067.26	24.2427	1104.04	36.4664	1135.52	22.0207	0.0283733	1104.04	36.4664
NS2A-17.2	ESG32	2013-01-07, 08:19	0	5.91904	2.67474	0.0705384	7.1079	5.91904	2.67474	0.0705384	7.1079	1.64314	7.59451	0.168946	2.67474	0.352194	---	---	---	---	486.504	---	29.8433	1.55941	2.73537	1.2405	14.8772	53.443	82.8139	153.345	8619.99	6.54171	33.5349	38.7206	1006.3	24.9203	1009.03	26.8084	998.964	29.3887	943.174	145.614	1058.85	53.2128	-0.0698249	1009.03	26.8084
NS2A-18.2	ESG32	2013-01-07, 08:49	-0.000120448	6.84751	2.0767	0.0749327	1.93763	6.83265	2.08236	0.0766439	2.46063	1.54664	3.2235	0.146356	2.08236	0.645993	---	---	---	---	711.509	---	3.86588	1.09798	2.43794	0.311274	22.2449	76.8277	120.14	195.617	10729.2	19.1722	50.3944	131.282	880.505	17.1382	871.694	17.5912	877.924	18.1831	1111.07	49.1441	924.833	44.8272	0.215446	1111.07	49.1441
ns2a-19.1	ESG32	2012-10-07, 00:18	-1.70315e-05	5.6747	2.61087	0.0759131	0.733118	5.67296	2.61096	0.0761552	0.764347	1.85094	2.72054	0.176275	2.61096	0.959721	---	---	---	---	1394.6	0.0963431	47.3632	1.14406	2.70952	0.362067	25.2663		249.638	470.612	10861.3	39.7566	107.252	225.607	1046.59	25.2232	1044.11	26.359	1045.76	27.1388	1098.28	15.2946	1058.15	34.7965	0.0493231	1098.28	15.2946
NS2A-2.1	ESG43	2014-06-02, 20:01	0	3.69041	2.66153	0.168668	0.872177	3.69041	2.66153	0.168668	0.872177	6.30172	2.80079	0.270973	2.66153	0.950278	---	---	---	---	---	---	---	---	---	---	---	---	---	---	8383.44	26.0856	87.1072	96.2666	1545.74	36.5796	1402.79	36.4103	1524.54	51.7015	2543.74	14.6179	1699.34	219.717	0.448533	2543.74	14.6179	1.25877e+15
ns2a-2.1	ESG32	2012-10-06, 16:33	-5.07095e-05	3.9709	1.61684	0.0925981	0.82143	3.96727	1.61748	0.0933033	0.897726	3.2427	1.84991	0.252063	1.61748	0.874358	---	---	---	---	716.422	0.251368	23.9362	5.85285	6.56668	2.63081	33.3354		115.283	191.595	9524.36	30.0865	78.707	119.471	1449.1	20.9914	1445.19	22.7954	1448.44	23.1843	1493.23	16.9887	1455.96	30.1024	0.0321714	1493.23	16.9887
NS2A-20.2	ESG32	2013-01-07, 09:20	-0.000239063	5.44936	2.93359	0.0726045	4.03816	5.42595	2.96489	0.0760035	5.8809	1.93134	6.58601	0.1843	2.96489	0.45018	---	---	---	---	696.673	---	4.90279	1.21835	3.07174	0.132861	26.3153	87.0262	129.17	201.909	8884.14	5.55873	13.9747	30.2915	1090.42	29.7433	1090.22	31.1603	1089.1	31.7939	1094.29	117.747	1109.6	106.571	0.00371649	1090.22	31.1603
NS2A-3.2	ESG32	2013-01-07, 05:16	0	5.23468	2.26143	0.079825	1.04105	5.23468	2.26143	0.079825	1.04105	2.10257	2.48955	0.191034	2.26143	0.90837	---	---	---	---	990.86	---	18.7613	0.998681	2.36935	0.278539	22.0166	99.6344	181.206	301.839	9509.53	58.8578	91.7312	308.102	1126.97	23.3823	1123.41	24.587	1124.65	24.4577	1191.81	20.5472	1180.61	37.1173	0.0573874	1191.81	20.5472
NS2A-4.1	ESG43	2014-06-02, 20:16	1.53082e-05	3.56813	1.17836	0.0999361	0.66551	3.56912	1.17852	0.099725	0.683698	3.85252	1.36248	0.280181	1.17852	0.864982	---	---	---	---	---	---	---	---	---	---	---	---	---	---	9293.17	88.6683	225.054	316.38	1592.28	16.6274	1589.47	18.4267	1593.38	18.6166	1618.15	12.7273	1581.69	29.6314	0.0177232	1618.15	12.7273	2267453842402302
ns2a-4.1	ESG32	2012-10-06, 17:31	1.4975e-05	3.42923	1.62136	0.103425	0.487661	3.43016	1.62144	0.10322	0.502113	4.14906	1.69741	0.291532	1.62144	0.955246	---	---	---	---	1265.66	0.0673869	59.9093	0.964958	2.26367	0.702402	23.8473		236.529	460.72	11279.2	75.262	146.14	258.091	1649.18	23.5939	1645.31	26.2957	1649.07	25.6868	1682	9.27079	1650.59	37.6065	0.0218135	1682	9.27079
NS2A-6.1	ESG43	2014-06-02, 21:14	7.13888e-05	8.86777	1.52899	0.0628379	2.56858	8.87921	1.53442	0.0618046	3.10487	0.959726	3.46333	0.112623	1.53442	0.443048	---	---	---	---	---	---	---	---	---	---	---	---	---	---	9602.6	9.92512	47.3508	88.0137	687.961	10.0125	688.483	10.3166	686.86	11.2546	666.421	66.4842	700.869	36.3903	-0.0331051	688.483	10.3166	2.35976e+14
NS2A-6.2	ESG32	2013-01-07, 05:47	-0.000264103	21.6111	2.01848	0.0640807	4.46546	21.5085	2.0735	0.0678745	6.96821	0.435108	7.27017	0.0464932	2.0735	0.285207	---	---	---	---	707.359	---	3.20456	2.67318	4.04508	0.786685	26.0543	80.3875	130.389	241.992	8240.62	4.89548	24.9886	105.797	292.955	5.93848	287.375	5.80751	273.119	6.3417	863.822	144.532	816.785	67.8864	0.667321	863.822	144.532
NS2A-7.1	ESG43	2014-06-02, 21:00	0	5.15092	1.23218	0.0788416	1.05798	5.15092	1.23218	0.0788416	1.05798	2.11043	1.62406	0.19414	1.23218	0.758702	---	---	---	---	---	---	---	---	---	---	---	---	---	---	7815.63	47.8057	94.4874	246.244	1143.76	12.9137	1142.45	13.6609	1143.67	13.7687	1167.3	20.9559	1145.39	32.9775	0.0212845	1167.3	20.9559	1138741868259285
NS2A-7.2	ESG32	2013-01-07, 06:17	-0.000118164	4.0007	2.21543	0.0900722	1.77685	3.99219	2.22054	0.0917187	2.15327	3.16773	3.09312	0.250489	2.22054	0.717897	---	---	---	---	434.29		30.0347	1.86537	3.13243	1.22808	17.0138	44.9082	67.5498	119.101	9674.84	27.7583	80.5748	111.053	1441	28.6738	1439.28	31.1769	1446.48	32.042	1460.74	40.9272	1390.43	53.0565	0.0146921	1460.74	40.9272
NS2A-8.1	ESG43	2014-06-02, 19:47	2.23751e-21	5.17469	1.51701	0.0766007	1.73519	5.17469	1.51701	0.0766007	1.73519	2.04103	2.30482	0.193248	1.51701	0.658188	---	---	---	---	---	---	---	---	---	---	---	---	---	---	8588.17	16.5303	46.2757	85.5392	1138.95	15.8377	1140.52	16.8313	1140.12	17.5016	1109.94	34.6613	1124.56	44.3983	-0.0275491	1109.94	34.6613	3.85687e+14
NS2A-9.1	ESG43	2014-06-02, 17:35	0.000154083	5.14319	2.53507	0.0748769	3.42909	5.15753	2.55036	0.0726769	4.66544	1.94292	5.31702	0.193891	2.55036	0.47966	---	---	---	---	---	---	---	---	---	---	---	---	---	---	10637.4	3.80171	14.3534	19.5529	1142.42	26.7002	1149.7	28.4124	1150.4	30.766	1004.07	94.6887	1072.12	77.5053	-0.145039	1004.07	94.6887	8.18934e+13
NS2A-9.2	ESG32	2013-01-07, 06:32	4.83167e-05	5.03375	1.95839	0.0818337	1.6862	5.03814	1.96033	0.0811512	1.89865	2.22089	2.72906	0.198486	1.96033	0.718318	---	---	---	---	824.585	---	17.4257	0.579521	1.98342	0.185095	18.4429	77.6049	148.273	275.631	11764.9	23.1175	51.1024	116.367	1167.18	20.9288	1163.85	22.1304	1170.23	22.4381	1224.25	37.2983	1120.25	43.9293	0.0493372	1224.25	37.2983
																															12308.6
20-210- Deformed biotite granite- Horse Canyon, Northern Snake Range (39.268112,-114.063042)
Mesozoic domains
20-210-3	ESG25	2014-02-02, 15:21	1e-32	66.2712	1.26883	0.0407473	8.75043	66.2712	1.26883	0.0407473	8.75043	0.0847765	8.84194	0.0150895	1.26883	0.143502	---	1.96284	2.00231	11.0159	222.165	0.0024718	3.00018	0.0538677	0.178015	0.247405	3.01977	17.496	40.121	92.3514	12823.6	1.40455	12.7379	107.407	96.5467	1.21589	97.3966	1.29917	96.6224	1.28484	-304.502	223.855	92.5181	18.1607	n/a	97.3966	1.29917
20-210-2	ESG25	2014-02-02, 14:02	0.000372325	65.5766	1.13814	0.0452735	6.77798	66.0203	1.32409	0.039736	16.0414	0.0829865	16.0959	0.0151469	1.32409	0.0822627	---	2.56181	2.53699	13.2921	272.147	0.00211756	4.06911	0.0496975	0.222469	0.241206	3.46321	22.5978	50.9949	111.93	13445.4	1.74967	18.7496	133.127	96.9108	1.27359	97.8843	1.16691	97.9679	1.16778	-369.218	415.768	49.6453	31.0003	n/a	97.8843	1.16691
20-210-14	ESG25	2014-02-03, 04:51	-0.00050892	65.4616	1.28142	0.0429101	8.56024	64.8657	1.57187	0.0503814	16.376	0.107092	16.4513	0.0154165	1.57187	0.095547	---	13.2064	13.5336	5.62885	857.725	0.0177432	20.1422	1.11118	2.71846	2.16723	21.7433	82.79	145.041	263.392	7405.22	1.08398	53.5047	82.0937	98.6227	1.53842	98.3372	1.32784	96.346	1.69406	211.617	379.487	118.799	12.8304	n/a	98.3372	1.32784
20-210-15	ESG25	2014-02-03, 05:43	1.50368e-20	65.1568	2.44746	0.0432915	5.9704	65.1568	2.44746	0.0432915	5.9704	0.0916103	6.45258	0.0153476	2.44746	0.379299	---	15.5152	15.3408	12.1561	1010.74	0.0351348	30.9415	1.22028	3.21304	2.59078	26.5684	98.2768	173.155	322.164	8081.2	2.76989	138.761	208.893	98.1855	2.38484	98.7492	2.42413	98.1349	2.79481	-151.901	148.188	98.625	7.45653	n/a	98.7492	2.42413
20-210-13	ESG25	2014-02-03, 03:33	8.08337e-05	64.4745	0.768228	0.0479489	3.17807	64.5687	0.782001	0.0467569	4.14378	0.0998447	4.21693	0.0154874	0.782001	0.185443	---	3.83571	3.69692	34.8991	892.293	0.072842	10.8269	0.174499	1.23534	1.19994	15.8924	75.9688	154.384	305.121	12023.6	10.305	195.309	773.403	99.0728	0.768828	99.2251	0.780393	98.8988	0.818575	35.7858	99.2088	103.331	6.43376	n/a	99.2251	0.780393
20-210-1	ESG25	2014-02-02, 13:09	0.000106319	64.0045	1.20001	0.0448681	3.62581	64.1275	1.21532	0.0432937	5.23937	0.0930853	5.37848	0.0155939	1.21532	0.22596	---	5.21209	5.10768	16.8329	1721.32	0.0144429	15.1861	0.242188	1.65901	1.67483	23.37	147.469	305.613	609.237	13414.5	8.6715	89.9873	643.613	99.7492	1.20294	100.325	1.21387	99.4367	1.23405	-151.776	130.04	113.807	12.2977	n/a	100.325	1.21387
20-210-8	ESG25	2014-02-02, 22:21	1e-32	64.2371	3.32683	0.0405551	10.3219	64.2371	3.32683	0.0405551	10.3219	0.0870484	10.8448	0.0155673	3.32683	0.306767	---	12.2548	12.3651	5.55412	743.775	0.0222668	17.355	1.18664	2.64068	2.02579	19.8674	71.6926	127.809	244.926	7667.37	0.964235	49.0775	71.4506	99.5803	3.28741	100.488	3.36402	99.6264	3.85346	-316.611	264.7	99.1951	9.55102	n/a	100.488	3.36402
20-210-12	ESG25	2014-02-03, 02:41	0.000149841	63.8169	2.34626	0.045562	4.26946	63.99	2.36188	0.0433432	6.82653	0.0933922	7.22358	0.0156274	2.36188	0.326969	---	3.4253	3.38379	18.915	558.161	0.00229403	7.84264	0.122634	0.722313	0.570491	9.10453	46.7772	98.9348	214.43	12489.4	4.58709	62.3582	339.75	99.9619	2.34277	100.534	2.35833	100.282	2.41911	-148.937	169.339	89.0769	12.9308	n/a	100.534	2.35833
20210-1.1	ESG43	2014-06-02, 16:35	0	63.5735	2.60435	0.0426021	15.3218	63.5735	2.60435	0.0426021	15.3218	0.0923965	15.5416	0.0157298	2.60435	0.167573	---	---	---	---	---	---	---	---	---	---	---	---	---	---	8333	0.417417	20.9451	26.5367	100.612	2.59994	101.28	2.74315	96.8222	4.40191	-191.902	383.289	127.696	23.2287	n/a	101.28	2.74315	1.04434e+13
20-210-5	ESG25	2014-02-02, 18:24	0.000177	63.3664	0.97384	0.044589	4.78656	63.5695	1.02523	0.0419637	8.08883	0.0910177	8.15355	0.0157308	1.02523	0.12574	---	3.09165	3.28323	15.38	441.732	0.00574999	6.14779	0.110337	0.557719	0.515486	6.83364	36.3839	81.5844	177.546	12940.8	3.79073	38.3624	278.447	100.618	1.02356	101.365	1.01641	100.963	1.02342	-229.813	203.87	84.8664	17.4715	n/a	101.365	1.01641
20-210-11	ESG25	2014-02-03, 01:23	0.000197234	62.8402	2.04957	0.0441859	3.55868	63.0647	2.06508	0.0412579	6.32413	0.0902032	6.65276	0.0158567	2.06508	0.31041	---	6.77897	6.88282	19.1884	1699.76	0.00339389	12.6845	0.189295	1.45864	1.60059	21.5846	139.656	306.919	622.982	12003.4	6.17628	63.1542	449.678	101.417	2.07796	102.259	2.09372	101.956	2.13697	-272.748	160.76	77.2726	16.104	n/a	102.259	2.09372
20210-8.1	ESG43	2014-06-02, 13:49	1.33576e-05	61.3187	1.11427	0.048901	1.2334	61.3335	1.11453	0.0487045	1.30276	0.10949	1.71445	0.0163043	1.11453	0.650078	---	---	---	---	---	---	---	---	---	---	---	---	---	---	16932.2	44.8143	152.683	2747.95	104.257	1.15262	104.183	1.15707	104.221	1.16352	132.608	30.6306	108.373	5.73896	n/a	104.183	1.15707	9.50443e+14
20-210-10	ESG25	2014-02-03, 00:31	-1.19374e-05	59.2652	0.870279	0.0471419	1.18509	59.2525	0.870545	0.0473178	1.23756	0.110108	1.51308	0.0168769	0.870545	0.575347	---	6.24365	6.31133	139.937	3198.08	0.00453259	20.6826	0.245928	2.70908	2.85395	45.2378	291.247	581.527	1043.64	15418.2	45.3557	494.396	3125.19	107.888	0.931396	108.003	0.937489	107.885	0.95823	64.261	29.4708	107.992	3.56961	n/a	108.003	0.937489
Pre-Mesozoic domains
20210-5.1	ESG43	2014-06-02, 15:51	2.67376e-05	5.4248	3.00993	0.0751604	1.4227	5.42741	3.01031	0.0747797	1.51862	1.89973	3.37168	0.18425	3.01031	0.892824	---	---	---	---	---	---	---	---	---	---	---	---	---	---	10523.6	23.8054	64.7425	129.139	1090.15	30.1921	1091.58	31.7907	1093.26	32.6398	1061.71	30.5542	1048.84	45.0045	-0.0281307	1061.71	30.5542	5.49932e+14
20210-2.1	ESG43	2014-06-02, 17:05	-1.58758e-05	5.70514	1.2945	0.075265	1.2126	5.7035	1.29481	0.0754908	1.24509	1.82496	1.79633	0.175331	1.29481	0.720812	---	---	---	---	---	---	---	---	---	---	---	---	---	---	11740.7	39.4641	58.3395	225.148	1041.42	12.4516	1039.55	13.0593	1038.63	13.0004	1080.73	24.9796	1114.83	38.6577	0.0380967	1080.73	24.9796	9.31208e+14
20210-3.1	ESG43	2014-06-02, 16:20	3.813e-05	18.6009	2.51651	0.0762208	1.68529	18.6137	2.51745	0.0756785	1.84374	0.560584	3.1204	0.0537239	2.51745	0.80677	---	---	---	---	---	---	---	---	---	---	---	---	---	---	11489.3	14.1498	52.1768	263.198	337.344	8.27408	328.146	8.14313	337.147	8.56063	1085.7	36.9625	343.693	22.866	0.697758	1085.7	36.9625	1.08041e+15
20210-7.1	ESG43	2014-06-02, 14:19	5.33247e-05	5.45938	2.22274	0.0776324	1.77819	5.46464	2.22483	0.076875	2.05017	1.93966	3.0254	0.182995	2.22483	0.735383	---	---	---	---	---	---	---	---	---	---	---	---	---	---	10708.4	13.0144	26.2019	71.0508	1083.31	22.1856	1081.6	23.3103	1085.67	23.5126	1117.08	40.9098	1040.01	47.9003	0.0317582	1117.08	40.9098	3.11829e+14
20210-4.1	ESG43	2014-06-02, 16:06	0	4.35735	1.72381	0.0921408	0.61435	4.35735	1.72381	0.0921408	0.61435	2.91562	1.83001	0.229497	1.72381	0.941966	---	---	---	---	---	---	---	---	---	---	---	---	---	---	13733.2	104.329	61.9925	454.597	1331.86	20.7423	1321.26	22.1055	1332.82	21.1472	1469.46	11.6632	1281.58	41.9121	0.100854	1469.46	11.6632	2603695737288151
20210-6.1	ESG43	2014-06-02, 15:04	4.60245e-05	3.66666	1.19338	0.106085	0.638719	3.66971	1.19396	0.105455	0.696432	3.96222	1.38223	0.272501	1.19396	0.863792	---	---	---	---	---	---	---	---	---	---	---	---	---	---	12334.2	65.9205	119.958	241.708	1553.48	16.4823	1535.41	17.9706	1556.76	17.7447	1721.47	12.7946	1507.2	27.2402	0.10808	1721.47	12.7946	1.79265e+15
20-210-16	ESG25	2014-02-03, 06:36	3.51497e-05	4.93028	0.990652	0.0799556	1.13258	4.93341	0.991669	0.0794581	1.22345	2.22071	1.57488	0.202699	0.991669	0.629681	---	5.68108	5.77653	27.2392	2238.9	---	21.66	0.29283	1.64285	1.01391	27.307	188.674	425.263	862.359	11684.1	39.2834	100.489	193.678	1189.81	10.7741	1190.22	11.4826	1189.98	16.9395	1182.71	24.1791	1187.54	158.184	-0.00635457	1182.71	24.1791
20-210-17	ESG25	2014-02-03, 07:02	6.55022e-05	3.29185	1.17742	0.107157	1.09043	3.29575	1.1794	0.106261	1.20389	4.44553	1.68533	0.303422	1.1794	0.699802	---	27.6848	27.1997	17.6937	1080.91	0.022974	6.94741	1.06451	3.09793	0.596803	27.8248	111.016	190.537	323.444	8955.24	36.0351	52.4395	118.622	1708.25	17.6987	1704.78	20.0322	1706.77	19.3735	1735.45	22.0788	1732.32	77.6296	0.0176729	1735.45	22.0788
20-210-18	ESG25	2014-02-03, 07:28	0	4.54604	2.10734	0.0869566	0.889322	4.54604	2.10734	0.0869566	0.889322	2.63737	2.2873	0.219972	2.10734	0.921319	---	9.59325	9.53375	64.5982	3020.87	0.0289013	26.4792	2.70291	6.3682	0.302282	64.1879	300.871	539.692	824.394	8907.7	66.7845	137.897	303.605	1281.72	24.4945	1276.34	26.0828	1279.78	26.2326	1358.69	17.1414	1310.92	34.6832	0.0606165	1358.69	17.1414
20-210-4	ESG25	2014-02-02, 17:06	-2.06684e-05	3.33005	1.11949	0.102948	1.08597	3.3288	1.12011	0.103232	1.11689	4.27589	1.5818	0.300408	1.12011	0.708123	---	15.2108	15.6882	16.8312	974.691	0.0155188	49.1653	1.38092	3.42366	1.27855	26.6859	97.4871	173.349	321.683	9741.59	42.0219	80.2091	139.935	1693.33	16.6806	1694.71	18.9185	1688.62	18.2854	1682.22	20.6212	1751.08	37.7017	-0.00742171	1682.22	20.6212
20-210-6	ESG25	2014-02-02, 19:17	0.00012458	5.51591	2.19398	0.0747346	4.86048	5.52834	2.19784	0.0729565	5.18565	1.81958	5.63218	0.180886	2.19784	0.390229	---	33.833	34.504	20.9839	2615.46	0.143595	8.59367	5.82789	12.9881	1.10468	92.5485	299.593	447.523	663.59	7850.07	17.6428	79.6306	97.316	1071.81	21.7025	1074.7	23.2871	1071.24	25.4066	1011.86	105.122	1076.21	51.2724	-0.062104	1074.7	23.2871
20-210-7	ESG25	2014-02-02, 20:35	0	4.02018	1.09215	0.0901616	1.18771	4.02018	1.09215	0.0901616	1.18771	3.09227	1.61352	0.248745	1.09215	0.676875	---	19.2776	19.9725	13.4625	1083.34	0.0178238	12.273	1.4706	3.98175	0.867258	32.9011	114.858	192.66	331.584	9705.46	36.1078	56.5561	145.16	1432	14.0243	1432.33	15.3465	1432.11	14.9339	1428.12	22.6749	1430.06	35.5291	-0.00294496	1428.12	22.6749
20-210-9	ESG25	2014-02-02, 23:13	2.61621e-05	8.05904	6.46551	0.083963	1.33302	8.06284	6.46569	0.0835946	1.41022	1.42952	6.61769	0.124026	6.46569	0.977031	---	8.35799	8.62741	27.8915	952.48	0.0225359	27.3981	0.622339	1.71077	0.666886	17.6166	88.2533	178.498	362.158	12248.8	30.1107	79.011	242.663	753.693	45.9905	736.12	46.2003	727.694	48.8242	1282.29	27.4746	1270.32	110.552	0.425932	1282.29	27.4746
SCKG- Deformed biotite granite- Smith Creek, Northern Snake Range (39.330548,-114.227668)
Mesozoic domains
SCKG-3.1	ESG43	2014-06-03, 01:38	-0.000348855	66.763	1.43278	0.0517466	6.15172	66.3452	1.56348	0.0568275	10.4852	0.1181	10.6012	0.0150727	1.56348	0.147482	---	---	---	---	---	---	---	---	---	---	---	---	---	---	9342.16	1.84649	54.6674	123.277	96.4397	1.49659	95.3971	1.40996	96.2817	1.69563	483.883	231.536	98.573	15.3681	n/a	95.3971	1.40996	4.25333e+13
SCKG-6	ESG25	2014-02-02, 18:51	6.81463e-05	66.9041	3.13211	0.0495348	2.76608	66.9865	3.13454	0.0485321	3.50279	0.099895	4.70052	0.0149284	3.13454	0.666849	---	5.33534	5.52687	31.0714	1415.14	0.0106468	10.0954	0.13109	0.846577	1.05038	14.8626	116.266	266.265	508.613	10985.1	9.01898	61.7893	703.826	95.5233	2.97214	95.4549	2.97902	95.658	3.01724	124.265	82.4856	85.7928	11.9158	n/a	95.4549	2.97902
SCKG-13	ESG25	2014-02-03, 02:15	-9.98272e-05	65.8033	0.818649	0.048639	3.42507	65.6849	0.838176	0.050105	4.42103	0.105176	4.49978	0.0152242	0.838176	0.18627	---	4.88594	4.95338	28.4683	931.809	0.0289611	12.3651	0.223415	1.224	0.968661	14.0953	76.1841	171.554	350.503	11657.2	6.7368	97.581	516.488	97.4019	0.810263	97.1498	0.815538	96.994	0.840749	198.857	102.689	110.873	9.43249	n/a	97.1498	0.815538
SCKG-1	ESG25	2014-02-02, 13:35	-0.000568943	64.0605	1.02223	0.0506852	5.69855	63.4094	1.2497	0.0589496	10.9469	0.128182	11.018	0.0157705	1.2497	0.113423	---	25.4282	27.0706	12.7596	1714.42	0.0218803	41.9932	1.84149	3.75941	3.04398	39.2512	164.074	303.409	547.278	8497.76	2.50802	142.249	187.649	100.87	1.25076	99.5297	1.07147	100.643	1.36771	564.287	238.438	102.574	8.6146	n/a	99.5297	1.07147
SCKG-12	ESG25	2014-02-03, 00:57	-0.000198988	63.763	0.908629	0.0490005	4.83567	63.5348	0.976578	0.0519163	7.21126	0.112666	7.27709	0.0157394	0.976578	0.134199	---	4.77042	4.68994	8.75478	504.019	0.00528674	10.9164	0.196798	0.684698	0.753489	9.17754	44.2449	89.2074	186.437	10688.9	3.33177	55.5671	247.607	100.672	0.975508	100.198	0.950892	100.356	0.991156	280.727	165.032	109.438	14.2111	n/a	100.198	0.950892
SCKG-9	ESG25	2014-02-02, 21:55	7.52311e-05	63.8742	0.737921	0.0463854	2.99711	63.9611	0.750345	0.045274	3.93666	0.0975966	4.00753	0.0156345	0.750345	0.187234	---	8.70203	8.73245	31.4429	2190.7	0.0121202	18.382	0.328629	1.51669	1.60019	23.7567	178.371	416.678	812.713	12393.9	9.21152	102.489	683.569	100.007	0.744605	100.344	0.755864	100.364	0.796402	-41.9431	95.6529	85.0291	11.9356	n/a	100.344	0.755864
SCKG-11	ESG25	2014-02-03, 00:05	-3.93369e-22	63.584	0.976496	0.0493763	1.82205	63.584	0.976496	0.0493763	1.82205	0.107071	2.06722	0.0157272	0.976496	0.472372	---	3.49753	3.63751	79.0041	2298.15	0.00875084	3.68297	0.0453427	0.484829	0.737389	13.2586	157.132	452.511	1026.2	17785.6	18.4233	21.8711	1365.94	100.595	0.974684	100.432	0.981761	100.668	0.977484	164.723	42.587	71.5609	10.9306	n/a	100.432	0.981761
SCKG-3	ESG25	2014-02-02, 15:47	1e-32	63.3487	1.02114	0.0480552	2.61894	63.3487	1.02114	0.0480552	2.61894	0.104593	2.81097	0.0157856	1.02114	0.36327	---	9.41638	9.38191	41.9824	2898.65	0.00649901	17.13	0.313608	1.60876	1.9397	28.274	233.189	528.304	1029.08	13029.4	12.4716	91.526	919.744	100.966	1.02297	100.966	1.03717	100.852	1.05882	100.959	61.9399	108.232	12.9519	n/a	100.966	1.03717
SCKG-6.1	ESG43	2014-06-03, 01:09	0.000478387	63.036	3.95918	0.0507978	7.57411	63.5851	4.05388	0.0437172	18.5951	0.0947979	19.0318	0.015727	4.05388	0.213005	---	---	---	---	---	---	---	---	---	---	---	---	---	---	8393.52	1.52458	71.4834	96.1038	100.594	4.04629	101.125	4.01078	102.314	4.72914	-127.668	459.362	87.4211	12.6184	n/a	101.125	4.01078	3.74213e+13
SCKG-9.1	ESG43	2014-06-02, 22:42	0.000368096	62.4631	1.47282	0.0523277	6.50459	62.8809	1.61761	0.0469006	13.751	0.10284	13.8458	0.0159031	1.61761	0.11683	---	---	---	---	---	---	---	---	---	---	---	---	---	---	9238.66	1.83025	63.478	114.323	101.711	1.63238	101.856	1.55148	103.753	1.92285	43.1303	328.765	80.0721	12.5034	n/a	101.856	1.55148	4.31444e+13
SCKG-14	ESG25	2014-02-03, 03:06	3.29422e-05	61.9247	0.694703	0.0452065	2.07942	61.9615	0.697246	0.0447196	2.3688	0.0995123	2.46928	0.016139	0.697246	0.282368	---	11.958	12.3708	72.5083	4745.11	0.00459333	20.2298	0.358057	2.47579	3.23462	53.5044	393.275	851.069	1566.42	14055.3	23.4772	146.651	1686.45	103.208	0.713886	103.634	0.725748	103.234	0.740995	-71.9712	57.8899	101.365	12.6459	n/a	103.634	0.725748
SCKG-7	ESG25	2014-02-02, 20:09	5.23664e-05	61.9563	1.37591	0.0435288	2.82433	62.0149	1.37916	0.0427528	3.40374	0.0950539	3.67253	0.0161252	1.37916	0.375534	---	2.64933	2.52803	21.6676	1072.03	0.00240222	4.11345	0.0241621	0.319675	0.579658	11.1873	84.0271	202.557	420.288	15132.8	11.9466	37.522	856.848	103.12	1.41088	103.793	1.42871	103.397	1.41986	-183.074	84.9998	62.7354	16.0794	n/a	103.793	1.42871
SCKG-8	ESG25	2014-02-02, 21:01	-3.4153e-22	61.4779	1.15713	0.0488557	1.6789	61.4779	1.15713	0.0488557	1.6789	0.109571	2.03904	0.016266	1.15713	0.567489	---	2.41805	2.55282	58.8117	2168.44	0.00291113	4.00327	0.0466325	0.591127	0.756	15.3376	157.837	429.608	986.035	16941.1	17.0093	20.254	1218.45	104.014	1.19392	103.92	1.20045	103.966	1.19747	139.889	39.4215	122.271	12.6661	n/a	103.92	1.20045
Pre-Mesozoic domains
SCKG-10	ESG25	2014-02-02, 22:47	0.00027793	13.346	2.63082	0.080528	1.95904	13.4133	2.63262	0.0765792	2.29997	0.787187	3.49579	0.0745531	2.63262	0.753084	---	22.7157	23.3385	187.922	1957.14	0.459837	91.3831	18.0895	27.0049	14.0708	108.33	197.696	321.059	735.117	8433.56	53.3436	435.841	711.922	463.528	11.7745	452.133	11.6802	435.708	13.4225	1109.38	45.9467	736.971	28.8484	0.592447	1109.38	45.9467
SCKG-15	ESG25	2014-02-03, 04:25	0	6.11343	1.39987	0.0777477	2.15788	6.11343	1.39987	0.0777477	2.15788	1.75349	2.57218	0.163574	1.39987	0.544238	---	26.9072	27.0734	10.5174	724.218	0.0135788	14.5902	1.68905	3.97426	1.11374	25.7671	84.5616	120.712	189.66	8766.65	12.1015	39.457	73.9819	976.609	12.6861	969.401	13.273	990.125	13.9544	1139.57	42.9164	810.431	33.231	0.149326	1139.57	42.9164
SCKG-16	ESG25	2014-02-03, 05:17	0	6.06995	1.01037	0.0733693	1.41119	6.06995	1.01037	0.0733693	1.41119	1.6666	1.7356	0.164746	1.01037	0.582144	---	8.59766	8.46254	34.1169	396.184	0.00758803	11.3332	0.270878	0.730092	0.116122	7.38068	35.8745	71.9141	152.202	10943	27.7517	35.5767	168.452	983.098	9.2126	981.372	9.66679	982.21	9.56504	1023.29	28.5577	1011.89	36.6208	0.0409643	1023.29	28.5577
SCKG-2	ESG25	2014-02-02, 14:55	7.05001e-05	4.06923	1.2061	0.0887857	1.26648	4.07442	1.20834	0.0877983	1.43774	2.97113	1.87808	0.245434	1.20834	0.643393	---	10.4864	10.8805	20.242	1050.84	0.0128239	38.9362	1.01011	2.82393	1.18836	27.0431	110.713	186.556	324.988	10831.3	36.3553	113.904	147.938	1414.88	15.3505	1417.98	16.7553	1415.1	17.7763	1377.24	27.6408	1413.03	41.5298	-0.0295815	1377.24	27.6408
SCKG-4	ESG25	2014-02-02, 16:40	1.44269e-05	3.74871	0.984266	0.103059	0.902411	3.74969	0.984611	0.102861	0.92468	3.7823	1.35074	0.266689	0.984611	0.728943	---	15.2618	15.7539	104.822	1400.71	0.0127357	9.77641	0.490207	2.02065	0.455715	24.3476	128.533	264.425	527.819	11675.3	49.4059	57.1531	185.209	1523.97	13.3634	1508.43	14.6112	1517.14	14.0416	1675.57	17.0868	1682.05	37.1159	0.0997514	1675.57	17.0868
SCKG-5	ESG25	2014-02-02, 17:32	0	3.6782	2.38869	0.10746	0.546792	3.6782	2.38869	0.10746	0.546792	4.0282	2.45047	0.271872	2.38869	0.974787	---	9.68807	10.2803	139.722	764.256	0.0611701	3.66717	0.329919	1.03798	0.105652	11.4393	66.9096	143.709	296.169	12270.7	141.504	72.1706	520.479	1550.3	32.9154	1527.99	35.7007	1550.48	33.5745	1755.98	10.0022	1540.75	86.8241	0.129838	1755.98	10.0022
SCKG-2.1	ESG43	2014-06-03, 03:36	2.01266e-05	8.94715	1.62484	0.0807665	1.19221	8.95041	1.62525	0.0804819	1.24802	1.23982	2.04914	0.111727	1.62525	0.793135	---	---	---	---	---	---	---	---	---	---	---	---	---	---	8995.04	30.9041	153.092	276.503	682.768	10.5292	667.69	10.5771	632.31	12.0202	1207.97	24.5746	1245.78	36.4018	0.447261	1207.97	24.5746	1.37406e+15
SCKG-10.1	ESG43	2014-06-02, 22:28	-0.000125764	5.99302	2.12272	0.0752802	3.09706	5.97945	2.13477	0.0770659	3.80212	1.77706	4.36043	0.16724	2.13477	0.489579	---	---	---	---	---	---	---	---	---	---	---	---	---	---	10865.3	5.27158	43.1618	31.5927	996.884	19.7174	991.225	20.5382	968.392	27.0058	1122.03	75.8133	1115.29	49.7757	0.116576	1122.03	75.8133	1.67353e+14
SCKG-7.1	ESG43	2014-06-03, 00:54	8.38104e-05	4.4657	1.43371	0.0866756	1.35869	4.47246	1.43637	0.0854983	1.59277	2.6358	2.14478	0.22359	1.43637	0.669707	---	---	---	---	---	---	---	---	---	---	---	---	---	---	12079.9	24.6197	31.1491	109.944	1300.82	16.9201	1299.03	18.1503	1301.64	17.7503	1326.02	30.8403	1280.53	62.1538	0.0203529	1326.02	30.8403	575908169072640
SCKG-8.1	ESG43	2014-06-02, 22:57	0	4.10404	2.82695	0.0841672	2.14344	4.10404	2.82695	0.0841672	2.14344	2.8277	3.54767	0.243663	2.82695	0.796846	---	---	---	---	---	---	---	---	---	---	---	---	---	---	8455.23	10.2438	27.0174	42.0411	1405.71	35.7044	1414.43	39.0184	1401.56	39.7892	1295.57	41.681	1449.22	75.3097	-0.0917429	1295.57	41.681	2.30008e+14
SCKG-5.1	ESG43	2014-06-03, 01:24	0	3.49871	1.56735	0.0999883	1.38417	3.49871	1.56735	0.0999883	1.38417	3.94042	2.09105	0.285819	1.56735	0.749549	---	---	---	---	---	---	---	---	---	---	---	---	---	---	8334.7	20.3135	61.889	71.0711	1620.6	22.4593	1620.33	25.1347	1628.76	26.0875	1623.06	25.7505	1557.87	47.5254	0.00168051	1623.06	25.7505	5.2594e+14
SCKG-11.1	ESG43	2014-06-02, 22:13	0	2.63613	2.06511	0.208913	0.650124	2.63613	2.06511	0.208913	0.650124	10.927	2.16503	0.379344	2.06511	0.95385	---	---	---	---	---	---	---	---	---	---	---	---	---	---	9180.97	48.7677	66.2126	128.558	2073.22	36.6119	1841.9	38.3429	2111.72	39.0621	2896.43	10.5446	1509.54	51.0062	0.36408	2896.43	10.5446	1.89776e+15
SCKG-4.1	ESG43	2014-06-03, 03:21	0	1.75531	1.35503	0.224696	0.485263	1.75531	1.35503	0.224696	0.485263	17.65	1.4393	0.569701	1.35503	0.941451	---	---	---	---	---	---	---	---	---	---	---	---	---	---	11172.2	81.1263	405.711	142.401	2906.59	31.7029	2814.22	53.404	2923.52	51.4411	3013.95	7.79126	2872.01	42.4312	0.066268	3013.95	7.79126	3.06417e+15
12EGSS1- Lexington pluton- Lexington Creek, Southern Snake Range (38.859183,-114.206641)
Mesozoic domains
ss1-10.1	ESG32	2012-10-07, 16:10	-4.16662e-05	68.6161	2.65649	0.0488244	0.993918	68.5646	2.65676	0.0494368	1.15981	0.099415	2.89888	0.0145848	2.65676	0.916477	---	---	---	---	987.33	---	4.62835	0.161071	0.947016	0.458981	19.4804		157.798	266.912	12003.9	40.2543	105.64	2762.09	93.3406	2.46197	93.1657	2.46341	93.2751	2.47465	167.582	27.0942	104.28	6.15618	0.44406	93.1657	2.46341	8.49983e+14
SS1-10.2	ESG32	2013-03-31, 07:30	3.77495e-05	66.7862	3.53674	0.0499417	1.67603	66.8317	3.53707	0.0493869	1.87309	0.10189	4.00242	0.014963	3.53707	0.883733	---	6.55782	6.34402	2.62872	1452.19	0.00238597	7.64526	0.287473	1.72591	0.498483	26.1694	130.874	223.173	414.35	14783.9	43.0849	97.0316	2877.47	95.7429	3.36147	95.575	3.36465	95.8137	3.38132	165.221	43.7762	82.3055	10.491	n/a	95.575	3.36465
SS1-108.1	ESG32	2013-01-06, 22:08	-2.32949e-05	65.9823	2.66127	0.0485003	1.06433	65.9546	2.66144	0.0488429	1.16699	0.102108	2.90605	0.0151619	2.66144	0.915827	---	---	---	---	4559.38	---	9.12102	1.57785	8.02973	1.63057	108.393	518.276	672.717	988.85	12489.6	84.4354	375.568	5571.25	97.0066	2.56244	96.9039	2.56645	96.9459	2.58885	139.277	27.4045	102.736	5.61331	n/a	96.9039	2.56645
SS1-108.2	ESG32	2013-03-31, 08:35	-2.44121e-05	66.3731	2.60778	0.0485031	1.36739	66.3438	2.60797	0.0488622	1.45276	0.101548	2.9853	0.015073	2.60797	0.873604	---	17.1433	18.6524	3.91134	3671.24	0.0370792	8.42877	1.34149	6.36596	1.06013	79.7417	375.383	582.413	970.285	14336	66.4089	220.533	4407.76	96.4417	2.49645	96.336	2.50071	96.3661	2.51504	140.2	34.1096	106.089	6.28385	n/a	96.336	2.50071
SS1-109.1	ESG32	2013-01-06, 22:54	0	69.5355	2.02888	0.0514615	8.8719	69.5355	2.02888	0.0514615	8.8719	0.102042	9.10093	0.0143811	2.02888	0.222931	---	---	---	---	246.533	---	4.9595	0.534597	1.41434	0.798907	10.4669	29.3709	30.6717	39.2976	8574.12	1.06682	22.4545	74.1816	92.0465	1.85424	91.6437	1.92006	92.3842	2.0619	260.556	203.775	85.2127	13.8079	n/a	91.6437	1.92006
SS1-109.2	ESG32	2013-03-31, 09:18	-0.000395524	71.4845	3.52736	0.038021	8.7817	70.9778	3.5979	0.043874	15.2505	0.0852287	15.6692	0.0140889	3.5979	0.229616	---	20.6109	21.321	0.648807	500.993	0.00557169	17.6351	0.468811	1.52805	0.983189	13.9904	49.7207	85.5696	145.353	10563.8	2.00699	79.4564	143.469	90.1891	3.22232	90.6251	3.20224	90.8063	3.48704	-118.835	376.094	83.6443	10.2769	n/a	90.6251	3.20224
ss1-12.1	ESG32	2012-10-07, 17:04	0	67.7527	2.01692	0.04968	1.67579	67.7527	2.01692	0.04968	1.67579	0.101101	2.62226	0.0147596	2.01692	0.769154	---	---	---	---	1045.57	0.0147699	3.22992	0.31983	1.75385	0.631522	22.4425		167.772	279.279	11072.8	11.365	73.3472	770.012	94.4509	1.89111	94.2485	1.89391	94.381	1.92088	179.036	39.0658	99.0971	4.67995	0.473578	94.2485	1.89391	2.42931e+14
SS1-12.2	ESG32	2013-01-06, 20:52	-8.26105e-05	68.353	2.9197	0.0479792	2.80718	68.2513	2.92349	0.0491937	3.68121	0.0993803	4.70086	0.0146517	2.92349	0.621906	---	---	---	---	542.056	---	1.54314	0.0910535	0.558176	0.125989	8.11524	52.615	84.2185	145.68	15827	11.1843	42.4839	764.483	93.766	2.7214	93.6191	2.72426	93.6571	2.73912	156.055	86.179	106.247	20.3673	n/a	93.6191	2.72426
SS1-12.3	ESG32	2013-03-31, 07:51	4.03222e-05	67.5116	2.91708	0.048962	2.43793	67.5607	2.91799	0.0483686	2.758	0.098712	4.01512	0.0148015	2.91799	0.72675	---	11.4878	11.653	0.841861	1756.12	0.0118191	6.2842	0.580179	2.65962	0.747621	35.4567	168.252	286.312	520.665	12671.9	18.7576	106.008	1266.36	94.7173	2.74364	94.6665	2.75119	94.9259	2.78188	116.309	65.0428	78.8996	7.43232	n/a	94.6665	2.75119
SS1-120.1	ESG32	2013-01-07, 03:45	-0.000352725	72.5182	2.89585	0.0503785	5.75348	72.0594	2.96416	0.055524	10.5698	0.106241	10.9776	0.0138774	2.96416	0.27002	---	---	---	---	283.99	---	14.4728	0.614767	1.15517	0.818585	8.69536	29.5209	48.9939	91.2395	8211.54	2.78038	75.3312	201.629	88.8446	2.61543	88.0085	2.55589	88.014	2.74743	432.416	235.491	102.293	13.4604	n/a	88.0085	2.55589
ss1-13.1	ESG32	2012-10-07, 17:23	1.16134e-05	67.9014	1.50619	0.0482644	1.05211	67.9156	1.50634	0.0480935	1.11433	0.0976377	1.87371	0.0147241	1.50634	0.803935	---	---	---	---	1034.58	0.449247	20.1714	0.718722	1.83857	1.3749	23.4659		170.235	263.33	12047.8	29.0326	334.189	1971.35	94.2259	1.40904	94.2059	1.41309	94.2119	1.44812	102.84	26.3455	94.7461	1.85149	n/a	94.2059	1.41309
ss1-14.1	ESG32	2012-10-07, 17:41	0.000236322	69.7768	1.63646	0.0480441	4.82279	70.0757	1.69161	0.0445498	9.45182	0.0876556	9.602	0.0142703	1.69161	0.176173	---	---	---	---	481.848	0.0437887	15.3532	1.35604	2.39915	1.88471	17.84		80.629	133.28	7820.7	1.45395	57.1745	101.452	91.342	1.53426	91.7108	1.51589	92.0965	1.64506	-81.2724	231.403	83.4926	4.82395	n/a	91.7108	1.51589	3.45026e+13
SS1-14.2	ESG32	2013-01-06, 22:38	-0.000147987	69.4611	1.6792	0.047883	3.75776	69.2761	1.7002	0.0500564	5.6219	0.0996271	5.87337	0.014435	1.7002	0.289476	---	---	---	---	456.768	---	18.646	0.842969	2.07846	1.26725	16.0636	50.029	73.8797	129.906	8836.15	6.70315	113.679	465.608	92.3888	1.55959	92.1437	1.55298	91.9371	1.62088	196.6	130.636	103.825	9.86375	n/a	92.1437	1.55298	1.48519e+14
SS1-14.3	ESG32	2013-03-31, 08:56	0	70.0027	2.38267	0.0469415	3.96428	70.0027	2.38267	0.0469415	3.96428	0.0924577	4.62522	0.0142852	2.38267	0.515147	---	21.1457	20.8062	4.40391	617.077	0.0149538	31.0573	1.05248	2.73914	1.36496	21.2775	63.569	105.4	189.334	10416.9	8.42028	147.399	589.442	91.4365	2.16325	91.5392	2.18045	91.299	2.26156	45.2117	94.7427	94.8322	5.42158	n/a	91.5392	2.18045
ss1-15.1	ESG32	2012-10-07, 17:59	0.000185242	68.7086	1.51017	0.0468827	3.03287	68.9391	1.52869	0.0441424	5.46313	0.0882858	5.67297	0.0145056	1.52869	0.269468	---	---	---	---	372.111	0.0150386	12.7163	0.231106	0.939872	0.774174	11.7536		66.3429	108.157	10327.9	3.58864	72.0425	246.571	92.8371	1.40902	93.2615	1.41076	93.2233	1.48682	-103.817	134.334	84.7287	7.04575	n/a	93.2615	1.41076	8.04658e+13
SS1-15.3	ESG32	2013-03-31, 09:40	7.26364e-05	67.1302	2.25203	0.0480297	3.32897	67.2183	2.25586	0.0469589	4.10336	0.0963232	4.68257	0.0148769	2.25586	0.481756	---	17.0339	16.5065	1.43579	654.511	0.0104741	39.1738	0.807616	2.41529	1.26662	20.7957	67.4722	114.44	206.648	11388.4	11.7669	244.28	789.916	95.1962	2.13171	95.31	2.14371	95.1088	2.25012	46.0951	98.0503	96.9266	5.08519	n/a	95.31	2.14371
ss1-16.1	ESG32	2012-10-07, 18:35	5.91441e-05	67.6801	2.1608	0.0490961	0.85022	67.7524	2.16113	0.0482256	1.07659	0.0981418	2.41444	0.0147596	2.16113	0.895085	---	---	---	---	2108.67	0.0421748	15.3663	0.314239	2.39858	1.21714	34.1895		349.143	525.43	14144.8	45.9021	351.59	3106.66	94.4513	2.02634	94.4165	2.03058	94.5558	2.06485	109.321	25.4225	88.6254	2.80307	n/a	94.4165	2.03058	9.85939e+14
ss1-2.1	ESG32	2012-10-07, 13:20	1.95412e-05	64.5833	1.64607	0.0479532	1.06661	64.6061	1.64625	0.0476654	1.1553	0.101726	2.01119	0.0154784	1.64625	0.818549	---	---	---	---	1574.89	0.318372	34.7918	0.951332	3.57047	2.15215	35.8462		258.151	407.461	13649.7	41.1217	535.091	2655.78	99.0159	1.6176	99.0582	1.62324	98.6976	1.67134	81.6612	27.4223	108.852	1.88385	n/a	99.0582	1.62324
SS1-20.1	ESG32	2013-01-07, 00:25	0	71.6152	2.31814	0.0483654	5.2401	71.6152	2.31814	0.0483654	5.2401	0.0931174	5.72996	0.0139635	2.31814	0.404565	---	---	---	---	100.314	---	0.812986	0.0294971	0.167936	0.0692331	1.01181	7.21116	18.8284	53.6955	10153.9	2.96798	7.23686	212.552	89.3919	2.05793	89.3325	2.07954	89.1891	2.0741	116.154	123.583	127.426	27.3447	n/a	89.3325	2.07954	6.26337e+13
ss1-22.1	ESG32	2012-10-08, 05:03	0	66.6253	1.61285	0.0483989	1.14052	66.6253	1.61285	0.0483989	1.14052	0.100161	1.97536	0.0150093	1.61285	0.816481	---	---	---	---	955.94	---	26.9961	0.728879	2.6391	1.60233	28.3999		149.827	233.929	11202.4	23.4906	428.52	1565.07	96.0373	1.53745	95.9853	1.54163	95.6254	1.60618	117.788	26.8899	105.292	0.603678	n/a	95.9853	1.54163
ss1-4.1	ESG32	2012-10-07, 14:02	-2.63819e-05	69.5151	2.28987	0.046857	1.64478	69.482	2.29036	0.0472458	1.8262	0.0937545	2.9293	0.0143922	2.29036	0.781882	---	---	---	---	2189.2	0.0322511	46.8478	1.88109	5.87547	4.58627	70.6578		360.19	537.325	10503.1	13.6507	383.351	948.928	92.1169	2.09481	92.1877	2.1025	91.7419	2.24677	60.6304	43.5181	97.7062	3.66385	n/a	92.1877	2.1025
ss1-5.1	ESG32	2012-10-07, 14:21	2.29878e-05	65.8278	1.49159	0.0487767	0.848957	65.8551	1.49178	0.0484384	0.945594	0.101415	1.76623	0.0151848	1.49178	0.844615	---	---	---	---	1938.63	0.0459288	16.9573	0.427762	1.96145	1.24732	31.3137		317.691	492.774	14223.8	46.8654	391.354	3085.04	97.152	1.43843	97.0975	1.44173	97.2246	1.46797	119.711	22.2862	93.5469	1.62393	n/a	97.0975	1.44173
SS1-5.3	ESG32	2013-03-31, 06:03	-2.3446e-05	66.6347	3.04064	0.0475145	1.8896	66.6065	3.04094	0.0478598	2.00905	0.0990731	3.64466	0.0150136	3.04094	0.834353	---	3.05624	3.23597	2.50502	1955.15	0.00396529	14.342	0.203559	1.5606	0.80268	25.6117	176.258	344.599	611.217	18994.3	33.4814	144.889	2231.02	96.0643	2.89959	96.0755	2.90844	96.014	2.92832	91.3135	47.6012	100.992	7.43292	n/a	96.0755	2.90844
ss1-6.1	ESG32	2012-10-07, 14:57	-3.58969e-05	70.5243	1.55882	0.0501117	1.84367	70.4786	1.56016	0.0506385	2.09891	0.099066	2.61525	0.0141887	1.56016	0.596564	---	---	---	---	563.119	---	25.5345	0.962856	2.8649	1.59567	20.8561		93.1845	144.16	9942.86	9.87847	231.026	696.672	90.8234	1.40706	90.5145	1.40794	90.6855	1.49098	223.401	48.5345	93.3577	3.33125	0.594835	90.5145	1.40794
SS1-6.3	ESG32	2013-03-31, 06:47	9.32404e-05	65.8142	2.88091	0.0488479	3.75249	65.9251	2.88584	0.0474742	4.83319	0.0992906	5.62919	0.0151687	2.88584	0.512655	---	2.29048	2.34605	0.587549	317.193	0.00557151	1.1603	0.0561996	0.357747	0.0790988	4.59235	28.3506	53.5137	103.371	16707.4	8.80213	18.4707	579.305	97.0497	2.77972	97.109	2.79179	97.1483	2.79451	72.1127	114.927	77.2549	34.5171	n/a	97.109	2.79179
ss1-8.1	ESG32	2012-10-07, 15:33	-0.00032026	71.8084	2.41742	0.0490216	3.19106	71.3957	2.44009	0.053704	5.78274	0.103714	6.27647	0.0140064	2.44009	0.388767	---	---	---	---	185.619	---	1.07212	0.0432579	0.251571	0.131735	3.95829		28.1443	42.5592	12103.7	3.26952	10.2475	234.779	89.6649	2.17276	89.022	2.14867	89.0198	2.15626	357.675	130.537	183.727	46.7906	n/a	89.022	2.14867
SS1-8.2	ESG32	2013-01-06, 19:05	-0.000242235	74.7227	6.30936	0.0498876	2.77076	74.3974	6.31437	0.0534304	4.60053	0.0990221	7.81256	0.0134413	6.31437	0.808233	---	---	---	---	1009.45	---	2.47038	0.37396	2.03504	0.467473	22.8817	109.188	153.681	253.592	13216.3	10.7599	76.3092	804.005	86.0712	5.39873	85.4752	5.37053	85.3366	5.45469	346.134	104.063	134.988	19.8998	0.753057	85.4752	5.37053
ss1-9.1	ESG32	2012-10-07, 15:52	-8.81426e-05	49.7802	0.895219	0.0475992	1.68914	49.7011	0.899905	0.0488956	2.243	0.135645	2.41679	0.0201203	0.899905	0.372356	---	---	---	---	389.206	---	0.875407	0.106336	0.348846	0.122335	4.71129		67.5349	138.109	13373.3	12.1379	27.1959	604.229	128.416	1.14419	128.373	1.14842	128.088	1.14483	141.804	52.648	175.051	17.3858	n/a	128.373	1.14842	2.57467e+14
SS1-9.2	ESG32	2013-01-06, 19:20	-3.65789e-05	47.8135	3.82327	0.0472618	1.92854	47.782	3.82384	0.0478005	2.21349	0.137933	4.41829	0.0209284	3.82384	0.865457	---	---	---	---	811.901	---	1.28681	0.104868	0.733165	0.285225	10.0636	68.7129	142.797	297.791	11650.3	24.3374	75.2935	1163.66	133.521	5.05311	133.671	5.07722	133.437	5.10139	88.3751	52.4739	141.79	14.4407	n/a	133.671	5.07722
SS1-9.3	ESG32	2013-03-31, 07:08	-6.06666e-05	46.5411	3.65521	0.0509293	2.96254	46.4902	3.65685	0.0518184	3.37591	0.153682	4.97688	0.0215099	3.65685	0.734768	---	2.88303	2.74696	0.683065	490.177	0.00826932	1.41866	0.0764713	0.450235	0.150495	6.66958	37.257	82.9347	181.691	14862.9	13.3679	35.8203	622.156	137.192	4.96388	136.687	4.96709	137.002	5.00228	276.407	77.3189	158.204	21.9055	n/a	136.687	4.96709	2.83325e+14
Pre-Mesozoic domains
ss1-1.1	ESG32	2012-10-07, 13:01	1.80883e-05	1.98418	2.54518	0.185593	0.50612	1.98483	2.54529	0.185371	0.513886	12.8772	2.59664	0.503821	2.54529	0.980221	---	---	---	---	470.205	0.153419	36.2396	3.57935	4.84206	1.27279	26.5006		69.953	117.933	8705.66	38.7168	78.704	76.8213	2630.2	54.9712	2593.88	80.3515	2624.11	63.4805	2700.81	8.48409	2673.94	71.7206	0.039591	2700.81	8.48409
SS1-101.1	ESG32	2013-01-06, 16:48	-7.55431e-05	9.93507	1.95753	0.0849231	2.11267	9.92155	1.96226	0.0859836	2.42057	1.19492	3.11603	0.100791	1.96226	0.629732	---	---	---	---	2274.14	---	11.0056	2.54934	13.1796	11.2152	146.817	283.388	320.984	512.552	9566.41	19.8306	397.391	197.018	619.041	11.5822	599.876	11.5175	699.989	25.3093	1336.97	46.7971	424.803	47.7615	0.551318	1336.97	46.7971
SS1-102.1	ESG32	2013-01-06, 17:34	-0.000359038	7.89273	11.7539	0.105661	6.76487	7.84191	11.7627	0.110542	7.13441	1.9436	13.7572	0.12752	11.7627	0.855021	---	---	---	---	774.882	---	23.924	2.01199	3.78101	2.41701	33.1739	111.963	147.639	278.886	11080.8	6.24597	43.0118	49.2978	773.702	85.7592	730.874	83.6485	738.744	100.392	1807.55	129.678	1013.35	154.788	0.595655	1807.55	129.678
SS1-103.1	ESG32	2013-01-06, 19:35	0	4.6623	2.04713	0.0836538	1.60701	4.6623	2.04713	0.0836538	1.60701	2.47393	2.60255	0.214486	2.04713	0.786588	---	---	---	---	965.229	---	6.7097	0.548113	1.53444	0.358676	18.3649	92.0134	183.307	330.808	8702.85	21.1287	37.3095	98.5084	1252.68	23.3062	1250.63	24.8749	1252.55	24.7535	1283.67	31.3025	1255.03	51.883	0.0257361	1283.67	31.3025
SS1-104.1	ESG32	2013-01-06, 20:21	0	6.08782	4.58292	0.0721511	2.28796	6.08782	4.58292	0.0721511	2.28796	1.63411	5.1223	0.164262	4.58292	0.8947	---	---	---	---	396.454	---	22.7865	1.31543	1.41535	0.336846	9.3774	39.5448	70.4231	134.196	8836.23	9.96488	30.253	60.6644	980.421	41.682	980.044	43.47	978.675	45.0814	989.32	46.5405	1003.38	58.223	0.00937599	989.32	46.5405
SS1-105.1	ESG32	2013-01-06, 20:36	-0.000256057	5.47237	2.36257	0.0776777	2.80146	5.44719	2.38487	0.0812939	4.11145	2.05772	4.75306	0.183581	2.38487	0.501753	---	---	---	---	755.541	---	4.59625	1.11671	2.4705	0.367136	21.2227	78.7358	128.877	214.195	7428.85	6.9663	20.4924	38.1222	1086.51	23.8458	1079.06	24.8102	1078.44	25.8953	1227.7	80.7279	1185.3	74.4232	0.121072	1227.7	80.7279
SS1-106.1	ESG32	2013-01-06, 21:22	6.74015e-05	5.6299	3.6896	0.0751411	2.08797	5.63675	3.69161	0.0741806	2.48294	1.81452	4.44893	0.177407	3.69161	0.829775	---	---	---	---	470.26	---	5.17276	0.815219	1.78341	0.0673752	12.2511	49.5008	86.0849	147.638	8534.85	12.9969	16.672	73.1711	1052.79	35.8574	1053.14	37.6123	1047.6	37.1844	1045.51	50.0779	1209	81.7187	-0.00730112	1045.51	50.0779
SS1-107.1	ESG32	2013-01-06, 21:53	5.29914e-05	3.21124	3.17494	0.110565	1.56052	3.21431	3.17639	0.109844	1.70406	4.71181	3.60461	0.311108	3.17639	0.8812	---	---	---	---	470.196	---	27.9997	0.439782	1.15184	0.40326	9.27127	41.7549	83.5108	168.786	9382.26	18.5011	45.9932	59.4113	1746.16	48.5875	1739.38	54.9545	1744.54	54.7669	1796.02	31.0174	1760.52	76.6011	0.0315384	1796.02	31.0174
ss1-11.1	ESG32	2012-10-07, 16:46	2.36655e-05	3.78115	1.75413	0.0967772	0.544126	3.78277	1.75426	0.0964494	0.572046	3.51554	1.84518	0.264357	1.75426	0.950729	---	---	---	---	760.429	---	17.0387	0.749162	1.96493	0.137512	18.1094		137.735	216.338	10471.6	55.8415	83.2691	211.145	1512.09	23.6447	1507.85	25.8502	1513.91	25.0562	1555.72	10.736	1479.43	38.4895	0.0307719	1555.72	10.736
SS1-11.2	ESG32	2013-01-06, 20:06	1.89431e-05	5.3799	2.98025	0.0806858	0.757581	5.38175	2.98035	0.080418	0.796022	2.0603	3.08483	0.185813	2.98035	0.966133	---	---	---	---	1889.2	---	1.82854	0.544173	2.57097	0.0708127	29.8585	183.025	315.787	507.798	15868	99.9395	64.1513	537.665	1098.66	30.1055	1092.93	31.4951	1098.85	30.6339	1206.4	15.6779	1087.08	44.9878	0.0940605	1206.4	15.6779		mixed age
SS1-110.1	ESG32	2013-01-06, 23:09	0	3.87959	1.97485	0.0944732	1.23665	3.87959	1.97485	0.0944732	1.23665	3.35756	2.3301	0.257759	1.97485	0.847541	---	---	---	---	1729.28	---	123.606	0.930638	2.45319	0.627111	24.7158	134.211	308.433	603.276	8162.46	31.8733	108.275	123.655	1478.37	26.0897	1474.82	28.4819	1465.71	30.1214	1516.77	23.3291	1572.92	40.2393	0.0276611	1516.77	23.3291
SS1-111.1	ESG32	2013-01-07, 00:10	9.39835e-05	5.37951	2.18504	0.0883398	2.33121	5.38865	2.19164	0.0870222	2.8142	2.22665	3.56693	0.185575	2.19164	0.614432	---	---	---	---	572.326	---	26.5833	0.539601	1.20237	0.289019	11.2932	50.7275	101.314	209.668	10240.6	11.0725	29.5594	59.5647	1097.36	22.1145	1082.67	23.0347	1085.55	24.1495	1360.15	54.2318	1254.83	60.0546	0.204002	1360.15	54.2318
SS1-112.1	ESG32	2013-01-07, 00:40	4.52547e-05	5.7878	2.53536	0.0740453	4.21388	5.79253	2.53668	0.0733998	4.34453	1.74714	5.03087	0.172636	2.53668	0.504223	---	---	---	---	682.933	---	56.3869	0.905254	1.98124	0.416966	14.9354	61.3981	121.063	245.272	10169.1	22.1994	61.5552	128.486	1026.62	24.0742	1026.73	25.4661	1024.94	25.9974	1024.13	87.9073	1049.8	41.4775	-0.00254098	1024.13	87.9073
SS1-113.1	ESG32	2013-01-07, 01:27	3.51026e-05	5.79258	1.78499	0.0848303	1.40959	5.79625	1.78612	0.0843364	1.53496	2.00618	2.35507	0.172525	1.78612	0.758416	---	---	---	---	1083.25	---	86.2025	1.38447	2.66457	0.192767	23.0521	107.831	200.243	369.059	10440.7	31.666	73.4262	183.428	1026.01	16.9418	1012.37	17.5328	1000.17	18.2985	1299.48	29.8322	1452.68	51.5922	0.220944	1299.48	29.8322
SS1-114.1	ESG32	2013-01-07, 01:43	-6.3625e-05	4.3716	2.38882	0.1212	1.16597	4.36658	2.3902	0.122052	1.25716	3.85392	2.70065	0.229012	2.3902	0.885046	---	---	---	---	741.428	---	10.243	0.682486	1.69978	0.827024	15.5576	71.6484	132.678	237.345	8249.36	24.7601	48.6247	108.241	1329.32	28.7114	1268.99	29.4524	1321.07	30.7398	1985.66	22.3693	1455.17	51.4621	0.360922	1985.66	22.3693	9.4825e+14
SS1-115.1	ESG32	2013-01-07, 01:58	-9.00695e-05	4.22106	2.36583	0.0846844	2.30942	4.21421	2.37139	0.0859488	2.70523	2.81207	3.59747	0.237293	2.37139	0.659184	---	---	---	---	839.489	---	11.265	0.599896	1.64151	0.480186	16.4292	80.2973	153.234	281.505	9898.77	10.0083	21.6844	42.2455	1372.61	29.3179	1375.42	31.7814	1371.08	31.7457	1336.19	52.3061	1393.01	69.836	-0.0293596	1336.19	52.3061
SS1-116.1	ESG32	2013-01-07, 02:28	-4.67982e-05	5.76421	4.4853	0.0708032	1.76195	5.75935	4.4861	0.0714724	1.97907	1.71107	4.90324	0.173631	4.4861	0.914925	---	---	---	---	1027.49	---	8.05625	3.07898	6.00848	0.752859	36.1558	116.924	170.515	267.744	9902.37	22.1163	49.7114	127.483	1032.08	42.7841	1034.88	44.8947	1031.51	45.3455	970.068	40.376	1041.94	58.5099	-0.0668153	970.068	40.376
SS1-117.1	ESG32	2013-01-07, 02:44	-1.3283e-05	3.12559	1.80742	0.11016	0.771372	3.12484	1.80758	0.11034	0.787127	4.86864	1.97152	0.320016	1.80758	0.916843	---	---	---	---	1858.64	---	12.3331	1.74391	4.40641	1.25397	43.6438	181.847	327.022	520.507	8659	74.4876	62.8892	232.818	1789.81	28.2493	1787.75	32.2832	1786.7	29.3396	1804.23	14.3129	1874.9	51.3537	0.00913674	1804.23	14.3129
SS1-118.1	ESG32	2013-01-07, 02:59	-1.18868e-05	5.83886	2.80921	0.0779722	0.605655	5.8376	2.80925	0.0781408	0.623165	1.84563	2.87754	0.171303	2.80925	0.976269	---	---	---	---	2864.82	---	21.2932	3.65404	6.07287	1.85467	53.8416	248.495	495.545	928.281	8235.09	153.593	413.141	896.808	1019.29	26.4853	1013.16	27.5192	1013.54	28.4348	1149.59	12.3754	1101.75	32.2785	0.118678	1149.59	12.3754
SS1-119.1	ESG32	2013-01-07, 03:14	0	5.48092	3.20263	0.0702168	4.62545	5.48092	3.20263	0.0702168	4.62545	1.7664	5.62597	0.182451	3.20263	0.569257	---	---	---	---	221.9	---	7.05936	0.385023	0.792056	0.497558	6.68543	26.6789	39.6543	73.2984	8907.98	3.17896	11.2974	17.4236	1080.35	31.8557	1087.32	33.9333	1079.74	35.9178	933.808	94.8956	1086.48	78.7481	-0.164392	1087.32	33.9333
SS1-121.1	ESG32	2013-01-07, 04:00	2.22004e-05	9.68577	3.99607	0.154716	1.05272	9.68966	3.99627	0.154432	1.07103	2.19751	4.1373	0.103203	3.99627	0.965912	---	---	---	---	1083.16	---	33.6117	3.42539	6.0394	2.32088	34.7332	117.39	185.397	315.317	11243.1	69.3572	196.777	671.778	633.151	24.0996	561.143	21.906	533.454	27.1663	2394.85	18.2215	2720.51	179.273	0.765687	2394.85	18.2215	7296386701675504
SS1-122.1	ESG32	2013-01-07, 04:15	-3.16545e-05	5.15553	1.68226	0.08857	0.777411	5.15259	1.68258	0.0890126	0.824635	2.38192	1.87379	0.194077	1.68258	0.897955	---	---	---	---	1571.08	---	21.4299	2.76664	12.9847	10.0207	111.713	192.624	233.058	374.102	11290.9	94.3392	187.53	486.369	1143.42	17.6294	1127.79	18.3671	1146.43	18.6672	1403.6	15.7963	1090.35	27.6866	0.196503	1403.6	15.7963
SS1-13.2	ESG32	2013-01-06, 21:37	-4.62202e-05	5.89872	4.32448	0.0773332	1.67799	5.8938	4.32529	0.0779887	1.86258	1.82447	4.70928	0.16967	4.32529	0.91846	---	---	---	---	317.539	---	16.6948	0.390579	0.847366	0.295055	7.54021	32.059	55.9854	105.638	10112.1	20.8949	30.9733	123.253	1010.29	40.4459	1004.01	42.0029	1008.82	41.9684	1145.72	37.0101	1050.24	69.4712	0.12369	1145.72	37.0101
SS1-15.2	ESG32	2013-01-06, 23:24	0	5.12212	3.10737	0.0821119	1.41576	5.12212	3.10737	0.0821119	1.41576	2.21033	3.4147	0.195232	3.10737	0.91	---	---	---	---	697.044	---	17.4298	0.586029	1.49737	0.144722	12.9252	67.4102	126.294	224.835	9987.89	26.1268	72.8519	133.825	1149.65	32.7197	1144.04	34.4107	1148.32	35.7744	1247.33	27.7201	1165.9	62.1646	0.0828142	1247.33	27.7201	6.88314e+14
SS1-16.2	ESG32	2013-01-06, 23:54	0.000537276	4.82786	3.30624	0.0834945	4.04149	4.87514	3.378	0.075854	8.4807	2.14532	9.1287	0.205122	3.378	0.370042	---	---	---	---	890.325	---	6.02292	1.46766	3.18642	0.736401	20.752	94.2649	154.164	250.185	8910.81	3.40711	17.4708	16.449	1202.78	37.0646	1209.34	39.015	1194.05	45.25	1090.35	169.9	1253.37	92.4418	-0.109129	1209.34	39.015	8.9877e+13
ss1-17.1	ESG32	2012-10-07, 18:54	-4.32379e-06	3.60702	2.33033	0.113092	0.436771	3.60674	2.33034	0.113151	0.439569	4.32557	2.37144	0.277259	2.33034	0.982671	---	---	---	---	206.901	0.0145318	7.14486	0.121809	0.37236	0.188566	3.38308		41.5301	105.909	9973.84	76.5325	166.372	276.054	1577.54	32.6095	1546.13	35.2727	1579.97	35.5734	1849.84	7.94869	1549.63	36.1424	0.164181	1849.84	7.94869
ss1-18.1	ESG32	2012-10-07, 19:16	0	4.08245	1.68167	0.0900847	0.582806	4.08245	1.68167	0.0900847	0.582806	3.04251	1.7798	0.244951	1.68167	0.944867	---	---	---	---	456.84	---	56.0423	0.416897	1.09171	0.41494	6.80807		82.226	198.121	9912.84	54.6233	99.0728	222.997	1412.39	21.3298	1411.21	23.0969	1414.54	22.852	1426.5	11.129	1378.7	42.9418	0.0107147	1426.5	11.129
ss1-19.1	ESG32	2012-10-07, 19:34	2.17837e-05	5.19227	1.627	0.0783203	1.14941	5.19432	1.62747	0.0780114	1.2205	2.07077	2.03428	0.192518	1.62747	0.800024	---	---	---	---	500.106	---	11.9474	0.463516	1.17962	0.0972409	10.1149		91.3081	163.313	8913.54	15.3057	48.9839	79.4714	1135	16.9371	1134.38	17.8878	1134.53	18.7965	1146.3	24.2497	1139.98	33.5933	0.0103934	1146.3	24.2497
SS1-2.2	ESG32	2013-01-06, 15:46	-7.26106e-05	4.13727	2.78342	0.090744	1.40825	4.13186	2.78496	0.0917557	1.59404	3.06189	3.20888	0.242022	2.78496	0.867889	---	---	---	---	497.842	---	47.3103	1.17402	2.57498	1.05399	16.0177	50.0503	80.8133	149.176	10414.2	34.8994	86.1515	144.388	1397.2	34.9834	1391.87	37.7143	1390.5	38.3049	1461.51	30.2947	1473.18	54.2135	0.0476456	1461.51	30.2947
ss1-20.2	ESG32	2012-10-07, 19:52	0	4.02017	2.50919	0.0912835	1.31404	4.02017	2.50919	0.0912835	1.31404	3.13075	2.83244	0.248745	2.50919	0.885874	---	---	---	---	573.538	---	4.25074	0.814669	1.22712	0.791389	12.1213		110.181	225.724	8354.71	10.8844	24.1511	43.7572	1432	32.2205	1430.31	34.9929	1436.67	34.9772	1451.7	25.0066	1373.96	45.0401	0.0147301	1451.7	25.0066	2.68158e+14
ss1-21.1	ESG32	2012-10-08, 04:45	-9.38881e-06	4.97495	1.84648	0.0787847	0.757342	4.97411	1.84655	0.0789177	0.774489	2.18756	2.0024	0.201041	1.84655	0.922172	---	---	---	---	1816.79	0.0462579	96.7968	3.89899	7.4491	1.31201	58.3967		322.826	501.603	6916.22	38.0865	144.489	189.478	1180.91	19.9254	1181.59	21.12	1183.17	22.4401	1169.21	15.3365	1161.78	23.491	-0.0105913	1169.21	15.3365
SS1-22.2	ESG32	2013-01-07, 01:12	0	3.05021	5.04179	0.14033	2.45539	3.05021	5.04179	0.14033	2.45539	6.34342	5.6079	0.327846	5.04179	0.899051	---	---	---	---	990.063	---	14.8707	0.708624	2.08828	0.489593	20.4756	93.0738	180.757	312.586	9547.01	85.8178	106.673	261.762	1827.94	80.2464	1758.71	88.5595	1821.18	85.0813	2230.54	42.5048	1948.67	120.952	0.211532	2230.54	42.5048	2.64084e+15
ss1-3.1	ESG32	2012-10-07, 13:44	3.46295e-05	2.73054	2.32327	0.149214	3.4362	2.73225	2.32348	0.148767	3.45195	7.50738	4.16107	0.365999	2.32348	0.558385	---	---	---	---	862.123	0.0613055	11.7083	0.5567	1.62835	0.47926	16.8209		155.9	270.061	9116.27	40.8707	64.8431	111.599	2010.55	40.1316	1941.25	47.9414	2008.12	43.5688	2331.06	59.1192	2040.94	51.9805	0.167224	2331.06	59.1192
SS1-3.2	ESG32	2013-01-06, 16:02	9.32935e-06	2.41844	2.57912	0.157538	0.391837	2.41885	2.57915	0.157419	0.395822	8.97325	2.60935	0.41342	2.57915	0.988427	---	---	---	---	559.236	---	12.6399	0.179472	0.446196	0.0869743	7.57569	45.637	105.091	224.526	11027.4	279.072	161.103	674.919	2230.54	48.6311	2174.47	59.3769	2227.9	50.2031	2427.39	6.71177	2316.66	78.7881	0.104193	2427.39	6.71177	7393169636095407
SS1-4.2	ESG32	2013-01-06, 16:17	7.17064e-05	5.59116	2.0564	0.0760425	2.11164	5.59841	2.06048	0.0750217	2.53957	1.84767	3.27032	0.178622	2.06048	0.630055	---	---	---	---	1505.17	---	13.2678	3.64589	6.28876	0.320858	43.5819	159.56	259.274	394.074	8148.52	17.3297	58.5282	96.8932	1059.44	20.1302	1059.02	21.1528	1060.57	22.2913	1068.21	51.0455	1047.24	42.3687	0.0086024	1068.21	51.0455
SS1-5.2	ESG32	2013-01-06, 17:03	0	5.10628	1.8719	0.0767713	1.53693	5.10628	1.8719	0.0767713	1.53693	2.07298	2.42202	0.195837	1.8719	0.772869	---	---	---	---	1291.65	---	5.34083	0.552262	1.97678	0.0565157	20.3915	113.797	231.954	415.586	12663	34.849	65.0923	177.949	1152.92	19.7617	1155.05	20.9736	1150.34	21.0367	1114.39	30.6807	1200.9	54.7652	-0.0364879	1114.39	30.6807
SS1-6.2	ESG32	2013-01-06, 17:18	-2.4152e-05	3.37436	4.05646	0.10724	1.98462	3.37289	4.0567	0.10757	2.00126	4.39734	4.52348	0.296482	4.0567	0.89681	---	---	---	---	546.005	---	7.60622	0.527281	1.20596	0.163267	11.5412	53.271	94.0485	162.649	10182	51.115	62.9856	172.48	1673.84	59.8029	1663.41	66.7069	1667.91	62.9863	1757.86	36.5995	1790.87	82.6047	0.0537302	1757.86	36.5995
ss1-7.1	ESG32	2012-10-07, 15:15	-8.32317e-05	24.7308	6.51463	0.066348	1.27995	24.6937	6.51506	0.0675441	1.53548	0.37714	6.69356	0.0404962	6.51506	0.973333	---	---	---	---	521.618	0.0574432	24.7258	0.421315	1.04111	0.488779	9.97013		99.0993	216.848	10548.2	13.7316	79.4032	339.593	255.908	16.3459	250.872	16.1405	245.261	17.0298	853.692	31.8992	540.684	43.6498	0.706132	853.692	31.8992
SS1-7.2	ESG32	2013-01-06, 18:49	4.78213e-05	4.81544	1.96571	0.0815275	3.62648	4.8196	1.9676	0.0808517	3.75433	2.31302	4.23869	0.207486	1.9676	0.464202	---	---	---	---	1226.91	---	69.7422	3.01175	5.23765	1.26762	35.5419	126.428	210.826	356.484	9065.97	25.6237	230.337	123.389	1215.41	21.7953	1215.31	23.5393	1230.67	31.3964	1216.99	73.8297	1171.4	32.8503	0.00137427	1216.99	73.8297
12EGNS3A- Deadman leucogranite- Deadman Canyon, Northern Snake Range (39.31456,-114.1991)
Dark rims
NS3A-108.1	ESG32	2013-03-30, 22:25	-4.27758e-05	72.2245	3.07486	0.0456336	1.93714	72.1688	3.07534	0.0462648	2.13876	0.0883898	3.74594	0.0138564	3.07534	0.820981	---	1.886	1.92305	115.657	1874.79	0.0148457	3.24701	0.182388	1.19016	0.242543	23.8887	157.485	310.591	610.103	20848.5	44.886	82.4568	3241.87	88.7109	2.70948	88.8778	2.72173	88.6422	2.7179	10.3931	51.452	105.981	14.9109	n/a	88.8778	2.72173		black rim
ns3a-13.1	ESG32	2012-10-07, 05:27	-5.88801e-06	70.3743	1.24315	0.0479481	0.753119	70.3668	1.24319	0.0480348	0.773036	0.0941216	1.46394	0.0142112	1.24319	0.849211	---	---	---	---	2435.91	0.0494017	6.03183	0.276065	2.37735	0.655053	40.5273		361.804	549.503	18380.2	65.3347	315.922	4597.88	90.9667	1.12295	90.9465	1.12589	90.9091	1.13495	99.9554	18.2863	96.2932	1.06227	n/a	90.9465	1.12589		black rim
ns3a-19.1	ESG32	2012-10-07, 12:07	3.06693e-05	68.9389	1.58506	0.0489251	1.32936	68.9771	1.58517	0.0484738	1.37792	0.0968954	2.10034	0.0144976	1.58517	0.754719	---	---	---	---	4476.74	0.450666	75.6743	9.15166	25.8215	13.3392	216.292		627.921	817.177	12414.4	96.1425	3447.52	6627.96	92.7863	1.46028	92.7202	1.46434	92.5486	1.60603	121.43	32.4652	95.4862	2.58232	n/a	92.7202	1.46434		black rim
ns3a-5.1	ESG32	2012-10-07, 02:25	0	76.7296	1.62801	0.0489046	1.32106	76.7296	1.62801	0.0489046	1.32106	0.0878796	2.09657	0.0130328	1.62801	0.776509	---	---	---	---	1350.36	0.0161617	2.30906	0.0451571	0.707043	0.25441	18.4768		206.624	356.393	17739.9	19.6312	47.404	1506.3	83.472	1.35017	83.3495	1.35256	83.4372	1.35711	142.236	31.0058	90.5351	5.56819	n/a	83.3495	1.35256		black rim
ns3a-6.1	ESG32	2012-10-07, 03:02	0	70.7177	1.54387	0.04775	0.733378	70.7177	1.54387	0.04775	0.733378	0.0930993	1.7092	0.0141407	1.54387	0.903268	---	---	---	---	2760.74	0.180137	7.09069	0.415236	2.26286	0.643763	46.168		436.494	824.893	21222.7	74.7047	258.651	5282.94	90.5185	1.38772	90.5288	1.39151	90.4226	1.39847	85.8705	17.3939	102.992	1.82373	n/a	90.5288	1.39151		black rim
ns3a-7.1	ESG32	2012-10-07, 03:20	4.05573e-05	70.3491	1.60477	0.0481851	1.15186	70.4007	1.60533	0.0475877	1.37422	0.0932006	2.11319	0.0142044	1.60533	0.759671	---	---	---	---	1212.14	0.0189781	3.25789	0.172336	0.877698	0.230114	17.7912		202.004	361.678	20183.1	29.4321	65.5012	2070.52	90.9233	1.44937	90.9526	1.45388	90.9574	1.4574	77.785	32.6424	84.0254	9.33851	n/a	90.9526	1.45388		black rim
NS3A-8.2	ESG32	2013-03-30, 14:19	0.000371581	75.7098	3.63054	0.0485624	1.80582	76.221	3.63536	0.0430583	4.11663	0.0778902	5.49204	0.0131197	3.63536	0.661934	---	1.6937	1.89813	82.9424	1394.36	0.0211608	3.42222	0.106505	1.04739	0.185529	19.4118	120.588	224.391	418.103	19935.6	31.2524	62.1647	2366.11	84.0253	3.0348	84.5024	3.05553	84.2294	3.0641	-165.326	102.445	34.2724	38.3886	n/a	84.5024	3.05553		black rim
ns3a-9.1	ESG32	2012-10-07, 03:57	-1.58958e-05	71.5053	1.04034	0.0483137	0.887436	71.4848	1.04054	0.0485476	0.946314	0.0936387	1.40649	0.013989	1.04054	0.739808	---	---	---	---	3284.61	0.427475	12.6823	0.633032	4.157	1.36037	77.2691		476.334	675.071	16993.5	50.9849	350.918	3645.69	89.5539	0.925397	89.4749	0.927629	89.5534	0.939665	125.016	22.2812	89.5888	2.61328	n/a	89.4749	0.927629		black rim
Mesozoic domains
ns3a-10.1	ESG32	2012-10-07, 04:15	-0.0015828	83.9667	1.54016	0.0479804	9.46524	81.6344	2.49643	0.0706381	22.9268	0.119307	23.0623	0.0122497	2.49643	0.108247	---	---	---	---	56.711	0.0155028	2.02281	0.0758029	0.368174	0.260526	2.86797		5.6166	5.58781	8887.68	0.436221	9.81704	36.628	78.4871	1.94749	76.2806	1.24419	75.7425	1.26215	946.068	469.475	141.334	38.4149	n/a	76.2806	1.24419	9.70965e+12
NS3A-10.2	ESG32	2013-03-30, 14:40	0	75.9338	4.54456	0.0501169	10.3012	75.9338	4.54456	0.0501169	10.3012	0.0910018	11.2592	0.0131694	4.54456	0.403632	---	8.86288	8.66356	1.2469	94.6072	0.00272106	3.14127	0.132468	0.584867	0.303919	5.14524	11.965	9.37454	8.9799	10496.6	0.943891	15.5506	71.6732	84.341	3.80796	84.0943	3.84164	85.1549	3.96103	199.406	239.247	61.0515	11.5034	n/a	84.0943	3.84164	2.07232e+13
ns3a-106.1	ESG32	2013-01-20, 22:08	0	87.6064	2.50077	0.0476344	14.5995	87.6064	2.50077	0.0476344	14.5995	0.0749698	14.8121	0.0114147	2.50077	0.168833	---	---	---	---	59.9536	0.00543756	4.09506	0.126207	0.494914	0.392826	3.7294	8.62893	8.03291	8.85828	9029.97	0.275075	7.95045	24.0984	73.167	1.8194	73.1546	1.92523	72.986	2.12382	80.1176	346.635	76.5058	16.8134	n/a	73.1546	1.92523
NS3A-106.2	ESG32	2013-03-30, 16:06	0	83.1795	5.59153	0.0541248	17.302	83.1795	5.59153	0.0541248	17.302	0.0897184	18.1831	0.0120222	5.59153	0.307513	---	9.42221	10.2978	0.429446	167.034	0.0152909	6.87669	1.27589	2.57026	1.38425	14.3509	22.9263	19.9511	23.3418	8070.93	0.310173	10.7061	25.8001	77.0379	4.28196	76.4219	4.34597	76.6797	4.70947	375.268	389.357	82.2186	15.9611	n/a	76.4219	4.34597
ns3a-11.1	ESG32	2012-10-07, 04:51	0	77.9646	1.77351	0.0469645	6.08897	77.9646	1.77351	0.0469645	6.08897	0.0830565	6.34199	0.0128263	1.77351	0.279645	---	---	---	---	90.0221	0.0326111	4.9326	0.182236	0.387239	0.298296	3.35542		16.7667	31.1098	8255.45	1.08098	17.2559	84.2779	82.1581	1.44783	82.2294	1.48003	82.0052	1.49896	46.3825	145.489	86.7976	3.05617	n/a	82.2294	1.48003	2.37578e+13
NS3A-11.3	ESG32	2013-03-30, 15:24	0.000349779	76.0758	1.86953	0.0413251	6.97712	76.5592	1.97456	0.0361	16.6377	0.0650146	16.7544	0.0130618	1.97456	0.117853	---	6.79754	6.92809	1.05936	168.052	0.00472937	0.925452	0.0799475	0.423851	0.192213	4.74081	17.5661	25.5112	48.7185	12565	2.34306	6.7953	178.25	83.6565	1.64118	84.841	1.60654	84.1249	1.57804	-624.532	454.642	5.07302	89.3127	n/a	84.841	1.60654
NS3A-11.4	ESG32	2013-03-30, 15:45	0.000524322	76.7585	4.66125	0.0409136	8.59093	77.4919	4.75819	0.0330522	26.3056	0.0588092	26.7325	0.0129046	4.75819	0.177993	---	18.1324	17.985	1.41197	227.54	0.00794635	12.022	0.408432	1.1789	0.679487	8.10622	23.6671	35.0433	52.7247	8993.02	1.59639	70.6415	122.537	82.656	3.90783	84.1317	3.92051	84.5969	4.41221	-871.995	758.129	62.9677	13.8463	n/a	84.1317	3.92051
NS3A-110.1	ESG32	2013-03-30, 23:10	0.00157745	80.1226	5.27348	0.0685807	13.8947	82.4708	6.0336	0.0452774	57.2497	0.0756977	57.5668	0.0121255	6.0336	0.10481	---	12.4706	12.5589	4.15597	31.943	0.00906476	1.65502	0.182412	0.612535	0.192569	3.81184	5.2923	2.85741	2.93131	9862.11	0.503883	10.7541	40.3724	77.6959	4.65972	77.9147	4.1962	79.2541	4.44872	-41.7604	1391	41.6797	55.2558	n/a	77.9147	4.1962	1.09291e+13
NS3A-112.1	ESG32	2013-03-31, 00:15	0	75.2665	2.97162	0.0567955	23.3292	75.2665	2.97162	0.0567955	23.3292	0.104043	23.5177	0.0132861	2.97162	0.126357	---	9.25796	9.23125	0.14404	37.3465	0.0158411	4.11023	0.134505	0.340377	0.229269	2.20092	4.66364	4.25492	5.37424	9561.79	0.225057	5.54096	16.9393	85.0838	2.51176	84.1432	2.84407	82.4033	3.15064	482.641	515.267	134.961	31.7293	n/a	84.1432	2.84407
NS3A-114.1	ESG32	2013-03-31, 00:58	0	76.0174	1.17992	0.0479053	2.75775	76.0174	1.17992	0.0479053	2.75775	0.0868904	2.99957	0.0131549	1.17992	0.393362	---	30.9794	30.7621	24.9326	1112.35	0.0102101	23.0335	2.56917	7.12491	2.1812	54.5129	139.578	183.225	260.912	10951	19.1206	799.545	1453.5	84.2489	0.987599	84.2296	0.99869	83.5296	1.10502	93.564	65.313	91.9253	2.48225	n/a	84.2296	0.99869	4.52426e+14
ns3a-115.1	ESG32	2012-10-08, 04:27	-0.000364406	69.8478	1.83404	0.0503344	2.63933	69.3914	1.85718	0.0556494	4.86148	0.110575	5.20414	0.014411	1.85718	0.356866	---	---	---	---	399.532	---	0.513761	0.0847003	0.492583	0.283735	8.34906		57.5302	78.4154	11872.2	4.6857	7.32331	327.286	92.2363	1.7008	91.362	1.67414	91.6748	1.67462	437.439	108.217	252.263	76.4756	0.791144	91.362	1.67414		mixed age
NS3A-115.3	ESG32	2013-03-31, 01:41	0	76.8141	2.62977	0.0451021	4.59579	76.8141	2.62977	0.0451021	4.59579	0.0809574	5.295	0.0130184	2.62977	0.496651	---	6.63897	6.52801	1.64134	557.877	0.00358122	1.45276	0.222736	1.09907	0.382577	12.2395	55.9906	67.3175	87.4386	13765.5	6.78984	25.9894	521.556	83.3807	2.1786	83.6449	2.20007	83.3782	2.19747	-51.1982	111.867	83.7007	11.4684	n/a	83.6449	2.20007	1.44358e+14
ns3a-15.1	ESG32	2012-10-07, 10:35	7.36866e-05	73.8963	2.57394	0.0502832	2.75991	73.9947	2.57739	0.0491998	3.58315	0.0916778	4.41383	0.0135145	2.57739	0.583934	---	---	---	---	141.961	---	2.59373	0.0837216	0.421348	0.331449	4.9827		16.5072	21.4924	11727.9	4.4987	7.56653	332.437	86.5365	2.21548	86.3848	2.21821	86.6147	2.22342	156.346	83.8789	64.5452	32.5956	n/a	86.3848	2.21821	9.44516e+13
ns3a-16.1	ESG32	2012-10-07, 10:53	0.000503739	77.4071	1.36878	0.0452246	4.22624	78.1174	1.46775	0.0377143	12.6811	0.066567	12.7657	0.0128012	1.46775	0.114976	---	---	---	---	156.551	---	3.93876	0.114375	0.353512	0.300814	3.40352		25.2357	46.6779	9839.39	2.13887	20.3853	165.564	81.9984	1.19591	82.9946	1.14737	83.0318	1.14751	-506.469	338.063	29.0847	22.5675	n/a	82.9946	1.14737
NS3A-16.2	ESG32	2013-03-30, 17:43	0.000312954	77.5432	2.79889	0.0425021	6.43208	77.9837	2.85597	0.0378369	14.3729	0.0668979	14.6539	0.0128232	2.85597	0.194896	---	3.49074	3.42373	4.07448	174.537	0.00924388	5.05399	0.0628291	0.356734	0.213716	3.53937	16.003	28.3058	54.8049	11324.4	2.58818	11.0777	200.696	82.138	2.33096	83.124	2.33265	82.4672	2.32276	-497.824	382.477	44.1508	54.6819	n/a	83.124	2.33265
NS3A-18.2	ESG32	2013-03-30, 19:26	0.000536919	75.5758	1.46878	0.0468967	6.57205	76.3154	1.62366	0.0389032	16.712	0.0702869	16.7907	0.0131035	1.62366	0.0966998	---	5.64337	5.34221	0.554091	205.925	0.0066223	0.623741	0.0734824	0.570736	0.319855	6.68217	27.2116	24.566	30.5393	13340.4	3.02408	3.12738	228.547	83.922	1.35378	84.8238	1.28057	84.6701	1.2413	-424.422	438.052	-269.468	-287.033	n/a	84.8238	1.28057	6.36158e+13
NS3A-19.2	ESG32	2013-03-30, 20:13	-0.000545351	66.2426	3.46037	0.0442706	6.83642	65.5969	3.52836	0.0522582	12.1434	0.109843	12.6457	0.0152446	3.52836	0.279017	---	2.86908	2.66763	3.74483	188.962	0.00156645	1.41324	0.032731	0.299774	0.287907	4.6985	21.1199	22.2002	28.3916	14435.5	3.06383	0.661718	202.956	97.5316	3.41536	97.0234	3.35919	96.4623	3.3198	295.731	277.16	2102.61	1415.22	n/a	97.0234	3.35919		met. overgrowth?
ns3a-21.1	ESG32	2012-10-08, 03:50	0.000127127	69.5539	1.01098	0.0460617	3.62174	69.7139	1.03681	0.0441812	5.70301	0.0873815	5.79649	0.0143443	1.03681	0.178869	---	---	---	---	921.219	---	0.214273	0.0324206	0.203049	0.27974	4.43789		204.126	722.404	12250.4	2.76819	1.43318	192.539	91.8127	0.945177	92.2258	0.946557	91.95	0.92504	-101.655	140.174	-26.9159	-182.076	n/a	92.2258	0.946557		met. overgrowth?
ns3a-22.1	ESG32	2012-10-08, 04:09	0.00044093	74.1577	1.04118	0.0490114	3.79998	74.7527	1.13957	0.0424753	9.98751	0.078345	10.0523	0.0133774	1.13957	0.113364	---	---	---	---	250.662	---	0.672661	0.17047	0.381302	0.266058	6.15072		30.4419	36.2482	11759.8	2.23814	8.67041	165.975	85.6649	0.969757	86.2157	0.914855	86.0889	0.906747	-199.361	250.214	33.9037	48.7226	n/a	86.2157	0.914855	4.73893e+13
ns3a-3.1	ESG32	2012-10-07, 01:49	0	75.0796	1.79352	0.0515752	4.6355	75.0796	1.79352	0.0515752	4.6355	0.0947153	4.97037	0.0133192	1.79352	0.360843	---	---	---	---	70.8671	0.0160328	0.940798	0.14559	0.571141	0.184169	4.83228		7.00451	7.35839	10804.6	1.53882	8.92903	115.534	85.2943	1.5197	84.895	1.53606	85.1308	1.53843	265.623	106.374	98.7045	1.95683	n/a	84.895	1.53606	3.26676e+13
NS3A-3.3	ESG32	2013-03-30, 13:57	-0.000936719	80.7404	4.95363	0.0367382	22.3571	79.3979	5.22534	0.050488	31.2008	0.0876758	31.6354	0.0125948	5.22534	0.165174	---	10.2047	10.1954	0.731708	34.4974	0.0140339	1.42383	0.231037	0.51824	0.168874	3.21894	5.09546	3.12968	3.62623	9658.3	0.746811	10.1314	60.2978	80.6842	4.18975	80.4044	4.04492	79.5625	4.03017	216.513	722.383	122.37	56.4942	n/a	80.4044	4.04492
Pre-Mesozoic domains
ns3a-1.1	ESG32	2012-10-07, 01:13	-5.12884e-05	6.05238	2.75962	0.0741001	1.32072	6.04678	2.76039	0.0748304	1.47737	1.7063	3.13088	0.165377	2.76039	0.881667	---	---	---	---	346.57	0.0151758	9.75689	0.328618	0.853597	0.232433	7.22373		61.3688	120.339	9861.25	15.1134	30.0026	91.4722	986.59	25.2521	983.245	26.2598	985.723	26.4854	1063.07	29.7182	1004.37	29.9593	0.0750929	1063.07	29.7182
NS3A-101.1	ESG32	2013-01-20, 18:39	0	10.8929	0.811718	0.076126	1.30712	10.8929	0.811718	0.076126	1.30712	0.963585	1.53865	0.0918028	0.811718	0.527552	---	---	---	---	1088.42	0.0475555	6.97262	1.2006	2.83072	0.426774	24.2313	109.391	176.698	282.796	11064	32.3667	54.4797	352.568	566.191	4.39982	554.436	4.44314	547.122	4.59844	1097.51	26.1585	1363.84	35.426	0.494826	1097.51	26.1585
NS3A-102.1	ESG32	2013-01-20, 18:54	1.35169e-05	5.23789	1.64753	0.0797332	0.917552	5.23917	1.64771	0.0795419	0.950922	2.09332	1.90242	0.19087	1.64771	0.866112	---	---	---	---	1086.98	0.0197674	22.5481	1.05458	2.90635	0.285978	25.5645	109.999	203.807	357.147	8546.61	50.1128	74.7371	262.485	1126.09	17.0244	1122.88	17.9128	1127.09	17.7686	1184.79	18.7875	1101.84	29.563	0.0522597	1184.79	18.7875
ns3a-103.1	ESG32	2013-01-20, 19:40	2.37398e-06	3.84982	2.91167	0.104961	0.338954	3.84999	2.91167	0.104929	0.340486	3.75783	2.93151	0.259741	2.91167	0.993232	---	---	---	---	190.837	0.0302131	3.097	0.0768052	0.14122	0.108592	1.54104	11.4483	36.7152	117.621	12018	289.2	15.7311	1113.37	1488.52	38.7008	1466.18	41.6132	1488.79	38.7746	1712.27	6.26255	1346.35	73.1254	0.143719	1712.27	6.26255
ns3a-104.1	ESG32	2013-01-20, 19:54	-7.88747e-05	6.06794	1.22025	0.0734747	1.64964	6.05931	1.22439	0.0745981	1.93993	1.69749	2.294	0.165035	1.22439	0.533734	---	---	---	---	1179.85	0.0232776	15.4119	1.86969	4.47983	0.810748	39.3437	133.944	191.165	280.487	10215.8	19.0237	88.8192	115.434	984.699	11.1809	981.559	11.6713	975.811	13.0111	1056.82	39.0595	1057.21	30.7152	0.0712122	1056.82	39.0595
ns3a-105.1	ESG32	2013-01-20, 20:10	0	6.83983	7.72522	0.0899891	6.79487	6.83983	7.72522	0.0899891	6.79487	1.81404	10.2883	0.146202	7.72522	0.750874	---	---	---	---	425.328	0.0106958	6.017	0.250556	0.688742	0.061762	8.31749	39.6888	78.2212	145.361	11564.5	19.9229	34.3375	136.269	879.641	63.5218	856.51	64.3966	877.004	66.1367	1424.47	129.788	949.963	140.134	0.398716	1424.47	129.788
NS3A-107.1	ESG32	2013-03-30, 22:03	0	6.11282	4.12529	0.0720363	2.56368	6.11282	4.12529	0.0720363	2.56368	1.62484	4.857	0.163591	4.12529	0.84935	---	24.1296	23.2179	4.88265	1141.86	0.0217241	10.3087	1.86677	5.17879	0.740058	41.5183	127.187	189.572	291.603	9912.17	13.8496	32.6888	84.6601	976.7	37.3879	976.305	39.0029	976.502	39.6721	986.081	52.1748	980.114	53.0012	0.00991429	986.081	52.1748
NS3A-109.1	ESG32	2013-03-30, 22:49	7.27168e-05	4.17641	6.1325	0.105641	5.20001	4.1819	6.13297	0.104645	5.28515	3.45021	8.09606	0.239126	6.13297	0.757525	---	16.4044	18.5163	5.251	1185.57	0.0126601	13.2665	1.0112	2.77836	0.342475	24.2437	106.99	215.867	403.237	11425	32.423	68.253	135.412	1382.15	76.2957	1353.38	81.1132	1374.74	82.7128	1707.28	97.2708	1482.71	134.385	0.207287	1707.28	97.2708
ns3a-11.2	ESG32	2013-01-20, 21:53	0	4.76373	1.32445	0.0753687	1.5168	4.76373	1.32445	0.0753687	1.5168	2.18145	2.01366	0.20992	1.32445	0.65773	---	---	---	---	312.546	---	8.26479	0.177876	0.537525	0.0365864	6.80877	31.4802	59.4175	103.818	12476.9	21.4417	26.7144	102.142	1228.39	14.8132	1237.44	15.9587	1226.94	16.0057	1077.48	30.4455	1266.98	118.9	-0.148457	1077.48	30.4455	4.21254e+14
NS3A-111.1	ESG32	2013-03-30, 23:54	2.98503e-05	7.06459	5.34465	0.077767	0.708468	7.0684	5.34469	0.0773433	0.747033	1.5087	5.39665	0.141475	5.34469	0.990373	---	18.2997	18.8008	56.4488	1929.09	0.0471643	28.2078	0.901484	3.07893	0.390905	31.8265	163.243	354.194	698.706	11289.4	162.033	337.964	1144.7	852.996	42.7025	842.805	43.6253	850.359	44.6909	1129.19	14.8799	912.479	49.8482	0.253618	1129.19	14.8799
NS3A-113.1	ESG32	2013-03-31, 00:37	-2.24669e-05	4.49967	2.20438	0.0854891	1.42359	4.49784	2.20475	0.0858046	1.46464	2.63031	2.6469	0.222329	2.20475	0.832955	---	8.36026	8.71796	11.6285	2006.33	0.228996	10.0461	6.26836	9.27959	0.89449	63.0626	195.018	332.185	519.979	8423.36	40.2675	92.6054	181.191	1294.17	25.8515	1291.44	27.6543	1287.84	27.96	1332.94	28.3319	1378.02	38.8581	0.0311376	1332.94	28.3319
NS3A-116.1	ESG32	2013-03-31, 02:03	1.68396e-05	3.75927	2.77917	0.115927	3.38434	3.76041	2.77921	0.115699	3.39344	4.24226	4.38628	0.265928	2.77921	0.633614	---	9.35777	9.80045	94.6391	1434.47	0.0583092	61.5933	1.64926	3.57498	0.269181	27.9127	101.081	238.087	506.705	8001.29	187.731	159.344	705.73	1520.1	37.6353	1479.45	40.8065	1514.15	38.9569	1890.02	61.0671	1710.01	88.7949	0.217228	1890.02	61.0671
NS3A-117.1	ESG32	2013-03-31, 02:26	0	6.57945	5.57174	0.0708767	7.19546	6.57945	5.57174	0.0708767	7.19546	1.4853	9.10049	0.151988	5.57174	0.612246	---	11.7241	12.7634	5.42585	471.03	0.0131729	30.4993	0.749484	1.64488	0.255279	11.1623	41.9909	79.3107	150.176	10774	25.4511	74.1545	167.454	912.1	47.3884	910.547	49.4086	911.643	51.0059	952.969	147.185	918.885	96.5501	0.0445153	910.547	49.4086
ns3a-12.1	ESG32	2012-10-07, 05:09	-3.15132e-05	7.34246	2.732	0.0942919	1.79855	7.33828	2.7322	0.0947293	1.80896	1.77988	3.27677	0.136272	2.7322	0.833808	---	---	---	---	52.0598	0.0327292	0.638193	0.011431	0.0102274	0.0800659	0.238111		11.8926	48.6032	11236.4	32.3706	1.9822	237.68	823.545	21.1229	795.343	21.1288	822.369	21.139	1521.88	34.1023	1778.33	235.068	0.477393	1521.88	34.1023
ns3a-12.2	ESG32	2013-01-20, 22:38	0	3.73385	0.758741	0.105429	0.56327	3.73385	0.758741	0.105429	0.56327	3.89317	0.944966	0.26782	0.758741	0.802929	---	---	---	---	369.463	0.0206461	7.79264	0.115752	0.510017	0.321567	6.41681	31.0983	68.2058	149.48	11404.9	133.876	51.3253	499.874	1529.73	10.3323	1509.68	11.2469	1529.7	10.4892	1721.01	10.3488	1531.51	37.648	0.122789	1721.01	10.3488
ns3a-14.1	ESG32	2012-10-07, 05:45	0	3.98151	1.03783	0.0912334	0.652355	3.98151	1.03783	0.0912334	0.652355	3.15942	1.22583	0.251161	1.03783	0.846635	---	---	---	---	1684.04	0.0322775	6.62325	2.55903	5.47684	1.24278	44.1135		305.077	468.893	8406.09	46.8106	60.7945	186.377	1444.46	13.4303	1443.92	14.6316	1443.98	14.0629	1450.65	12.4163	1454.85	13.286	0.00463713	1450.65	12.4163
NS3A-15.2	ESG32	2013-03-30, 17:15	0	3.36613	5.3648	0.102555	0.271275	3.36613	5.3648	0.102555	0.271275	4.20074	5.37165	0.297077	5.3648	0.998724	---	10.4861	10.7696	74.215	974.048	0.0186419	24.9502	0.509101	1.80256	0.737052	20.2349	84.3422	171.5	337.15	14219.8	642.102	287.108	2161.4	1676.8	79.2091	1677.61	88.8623	1675.75	80.6479	1670.06	5.01633	1735.67	90.3278	-0.00452314	1670.06	5.01633	1.44039e+16
ns3a-17.1	ESG32	2012-10-07, 11:30	-7.58778e-06	3.1051	1.90336	0.111345	0.409305	3.10467	1.90339	0.111448	0.414062	4.94945	1.9479	0.322095	1.90339	0.977146	---	---	---	---	611.528	---	17.6798	0.604684	1.56508	0.259778	12.5636		112.702	267.557	9695.61	93.373	63.5879	289.932	1799.95	29.8928	1796.69	34.1493	1799.06	30.7805	1822.37	7.5125	1830.31	28.7684	0.014089	1822.37	7.5125
NS3A-17.2	ESG32	2013-03-30, 18:19	0	3.17914	3.1549	0.108975	0.58932	3.17914	3.1549	0.108975	0.58932	4.72628	3.20947	0.31455	3.1549	0.982997	---	6.3376	6.34469	22.6121	1745.28	0.0876422	32.2198	4.7605	7.31041	1.08667	46.9899	157.991	307.634	606.079	8536.23	119.639	156.607	380.35	1763.06	48.665	1760.51	55.2566	1758.58	51.574	1781.57	10.746	1841.78	59.1919	0.0118192	1781.57	10.746
ns3a-18.1	ESG32	2012-10-07, 11:48	1.04318e-05	6.54911	1.06886	0.0733858	0.638616	6.55034	1.06894	0.073237	0.655976	1.54159	1.25417	0.152664	1.06894	0.85231	---	---	---	---	1248.92	0.0307194	18.5579	0.654473	2.30385	0.104556	25.5416		211.92	320.179	12649	68.3227	120.252	447.453	915.878	9.12652	911.827	9.44338	915.742	9.54426	1019.64	13.2821	919.298	25.1591	0.105734	1019.64	13.2821	1.73825e+15
ns3a-2.1	ESG32	2012-10-07, 01:31	-1.53419e-06	3.14007	1.47356	0.112117	0.261052	3.13998	1.47357	0.112138	0.261655	4.92412	1.49662	0.318473	1.47357	0.984598	---	---	---	---	2670.3	0.165757	50.8984	9.05435	16.0155	2.48232	103.536		462.321	771.073	8073.55	239.955	348.466	753.476	1782.27	22.9451	1774.93	26.0563	1780.66	24.5421	1833.57	4.74084	1807.39	38.0364	0.031982	1833.57	4.74084
ns3a-20.1	ESG32	2012-10-07, 12:43	1.12216e-05	4.39262	2.32466	0.105884	1.20819	4.39351	2.3247	0.10573	1.21453	3.31809	2.62285	0.227608	2.3247	0.886327	---	---	---	---	952.117	0.0158369	2.85141	1.21687	2.15768	0.245928	23.3396		168.586	314.715	10260.2	66.3042	69.0121	291.249	1321.95	27.7852	1288.34	29.0948	1314.82	28.7856	1726.25	22.2996	1533.88	40.6015	0.253676	1726.25	22.2996
NS3A-20.2	ESG32	2013-03-30, 20:35	8.89677e-06	3.84032	3.80775	0.10049	0.583543	3.84094	3.80777	0.100367	0.590699	3.60294	3.85331	0.260353	3.80777	0.98818	---	3.69043	3.73563	28.9213	392.558	0.00245654	4.09124	0.0271097	0.177546	0.0936306	2.48765	24.3984	93.6214	296.735	14205.3	159.939	14.4883	614.218	1491.65	50.706	1478.16	54.8985	1491.79	50.8747	1630.09	10.9791	1447.29	102.274	0.0932063	1630.09	10.9791
NS3A-21.2	ESG32	2013-03-30, 20:58	0	4.93625	5.95564	0.0893685	6.10913	4.93625	5.95564	0.0893685	6.10913	2.49626	8.53177	0.202583	5.95564	0.698054	---	10.6918	11.5537	14.5082	646.848	0.00952816	15.0338	0.520542	1.70755	0.46488	14.1223	54.1495	109.382	205.884	8802.86	73.6053	283.401	363.334	1189.18	64.6747	1175.02	68.1522	1184.08	73.9187	1411.24	116.901	1231.2	115.499	0.167382	1411.24	116.901
NS3A-22.2	ESG32	2013-03-30, 21:20	0	4.61865	1.6274	0.0959339	2.26848	4.61865	1.6274	0.0959339	2.26848	2.8639	2.79185	0.216513	1.6274	0.582911	---	10.761	10.9111	36.14	3223.69	0.0264249	46.6598	1.90968	6.86278	1.3969	77.0363	321.004	583.536	884.44	9458.22	60.9823	164.409	281.656	1263.42	18.6715	1242.83	19.8741	1251.51	20.5045	1545.66	42.6306	1399.43	29.4107	0.195923	1545.66	42.6306	1868225191966903
NS3A-3.2	ESG32	2013-01-20, 19:09	-1.3994e-05	10.3283	4.57187	0.0834785	1.10478	10.3257	4.57194	0.0836755	1.12676	1.11733	4.70874	0.0968458	4.57194	0.970948	---	---	---	---	2034.75	0.0379138	12.6435	1.74504	4.51229	0.987294	49.2802	212.51	373.884	597.104	9869.88	55.5827	156.76	574.075	595.897	26.0228	578.654	25.7959	579.064	27.273	1284.17	21.9462	992.468	52.5124	0.549395	1284.17	21.9462	2.89268e+15
ns3a-4.1	ESG32	2012-10-07, 02:07	1.27011e-05	4.82396	1.71463	0.0829094	0.547088	4.82507	1.71468	0.0827303	0.562458	2.36408	1.80457	0.207251	1.71468	0.950185	---	---	---	---	2521.38	0.238598	12.7138	5.01108	10.8557	2.77462	87.0567		439.166	695.034	7315.7	86.1376	173.478	415.525	1214.16	18.9758	1211.16	20.1047	1214.1	20.1644	1262.01	10.9897	1215.03	15.6215	0.0402922	1262.01	10.9897
ns3a-5.2	ESG32	2013-01-20, 20:40	2.03354e-05	3.78778	3.71828	0.110631	3.80666	3.78918	3.71837	0.110354	3.82171	4.01556	5.33214	0.26391	3.71837	0.697349	---	---	---	---	1069.29	0.0214	13.2884	0.768989	2.65133	0.310032	27.1067	111.176	197.415	335.201	10338	70.2999	100.628	266.281	1509.81	50.0506	1478.73	54.2229	1508.29	52.8487	1804.46	69.4912	1538.45	60.386	0.180512	1804.46	69.4912
ns3a-6.2	ESG32	2013-01-20, 20:55	0	5.13223	1.04626	0.0777265	0.790613	5.13223	1.04626	0.0777265	0.790613	2.08816	1.31138	0.194847	1.04626	0.797828	---	---	---	---	2476.22	0.0110808	19.8438	3.40859	8.13797	0.392195	69.032	268.887	429.75	648.422	11874.2	76.529	201.838	392.764	1147.58	10.9986	1148.05	11.6463	1148.02	11.936	1139.03	15.7252	1141.8	19.102	-0.0079251	1139.03	15.7252
ns3a-7.2	ESG32	2013-01-20, 21:09	-2.41717e-05	5.244	1.79838	0.0780632	1.23943	5.24171	1.79891	0.0784059	1.30854	2.06242	2.22449	0.190777	1.79891	0.808685	---	---	---	---	1036.46	0.0135026	11.9662	1.46679	3.67872	0.237682	31.297	115.608	183.31	299.951	9835.87	27.9056	65.1556	146.337	1125.58	18.579	1123.92	19.5857	1126.3	19.9021	1156.31	25.9606	1114.73	32.5257	0.0280125	1156.31	25.9606
ns3a-8.1	ESG32	2012-10-07, 03:39	2.08384e-05	5.7114	2.5756	0.0761103	0.808736	5.71355	2.57574	0.075814	0.857981	1.82955	2.71488	0.175023	2.57574	0.948749	---	---	---	---	714.714	0.0647288	21.7044	0.531269	1.55747	0.199655	15.2038		124.256	221.954	10927.7	34.897	65.4685	199.311	1039.73	24.7325	1037.38	25.8379	1037.92	26.0086	1089.29	17.1913	1076.99	36.7332	0.047659	1089.29	17.1913
ns3a-9.2	ESG32	2013-01-20, 21:39	6.61993e-06	3.42539	2.50271	0.108426	0.560638	3.4258	2.50274	0.108336	0.567325	4.36024	2.56624	0.291903	2.50274	0.975257	---	---	---	---	2009.03	0.0290062	1.407	0.587673	2.23494	0.131931	30.6886	182.858	371.343	653.135	12461	115.243	69.4307	394.753	1651.03	36.4538	1636.46	40.3326	1649.89	37.3555	1770.82	10.3587	1699.11	57.2478	0.0758731	1770.82	10.3587
ELM89DM- Deadman leucogranite- Deadman Canyon, Northern Snake Range (39.32240,-114.191541)
Mesozoic domains
ELM89_DM_1.1	ESG29	2012-08-07, 11:14	0.000123657	81.0407	1.51268	0.0479705	1.75996	81.2219	1.51681	0.0461457	2.6999	0.0783355	3.0968	0.0123119	1.51681	0.489799	---	---	---	---	2076.83	0.0851431	32.5198	7.68439	18.7136	8.85095	139.017	293.747	307.903	403.087	9938.65	11.3695	350.385	921.393	78.8833	1.18922	79.0242	1.19316	79.0114	1.28523	4.18813	65.0275	76.8487	3.89097	n/a	79.0242	1.19316
ELM89_DM_10.1	ESG29	2012-08-07, 14:40	8.16144e-05	82.4996	0.908407	0.0508569	2.74831	82.6213	0.920309	0.0496577	3.7142	0.0828697	3.82652	0.0121034	0.920309	0.240508	---	---	---	---	383.355	0.0155278	2.44369	0.132156	0.565847	0.151726	7.31838	36.7276	73.193	147.507	13472.5	5.01876	38.5973	414.046	77.5552	0.709472	77.3589	0.712282	77.6068	0.719607	177.988	86.6014	74.0582	10.201	n/a	77.3589	0.712282
ELM89_DM_102	ESG29	2013-03-31, 17:25	0	89.6366	2.66014	0.0539125	18.4642	89.6366	2.66014	0.0539125	18.4642	0.0829288	18.6548	0.0111562	2.66014	0.142598	---	8.09224	8.30857	2.52303	144.488	0.00219828	2.42671	0.210114	0.68072	0.517896	5.6011	15.0736	22.3514	37.6968	8983.88	0.381639	8.98273	34.2088	71.519	1.89199	70.956	2.07149	71.835	2.07286	366.416	416.16	64.116	14.9192	n/a	70.956	2.07149
ELM89_DM_105	ESG29	2013-03-31, 22:28	-0.000272245	82.8623	4.27356	0.0474991	6.48176	82.4571	4.30145	0.0514904	9.74215	0.0860992	10.6495	0.0121275	4.30145	0.403911	---	10.0613	9.66942	12.0637	1104.65	0.0253957	10.8211	0.412375	1.72969	1.30945	23.6277	105.921	199.301	312.45	11563	3.35977	56.4187	278.398	77.7088	3.32254	77.3385	3.30437	78.2448	3.39781	261.844	223.712	61.263	14.2804	n/a	77.3385	3.30437
ELM89_DM_109	ESG29	2013-04-01, 00:17	0.000907148	83.4514	3.16853	0.0430814	12.5867	84.8406	3.57934	0.0294208	50.796	0.0478136	50.922	0.0117868	3.57934	0.0702907	---	14.1445	14.3431	4.17141	449.005	0.00851715	6.64933	0.65519	1.98794	1.68699	16.9488	47.3613	67.9371	101.335	8494.5	0.909265	25.5534	75.8794	75.5384	2.688	77.2087	2.4888	76.8177	2.62363	---	---	52.4292	25.0091	n/a	77.2087	2.4888
ELM89_DM_110	ESG29	2013-04-01, 00:38	0.00101498	83.3761	3.23402	0.0430319	13.1793	84.932	3.73405	0.0277162	60.0362	0.044995	60.1522	0.0117741	3.73405	0.0620767	---	14.6468	14.821	5.02247	527.209	0.00696051	7.75787	0.736009	2.28131	1.86264	19.8772	53.1949	77.0138	115.213	8488.37	0.964533	35.6299	80.4189	75.4575	2.80119	77.2829	2.54531	78.9123	2.71662	---	---	28.8165	20.8437	n/a	77.2829	2.54531
ELM89_DM_111	ESG29	2013-04-01, 00:59	0.000253994	84.5915	5.15091	0.0382793	7.02271	84.9811	5.17146	0.0344776	13.5675	0.0559391	14.5196	0.0117673	5.17146	0.35617	---	20.9505	19.883	15.2716	603.04	0.0146965	13.4507	1.03648	2.90241	2.20797	24.6419	65.8863	92.6189	148.748	8295.49	2.57764	96.775	218.046	75.4142	3.87729	76.6162	3.93826	76.9705	4.18598	-751.894	380.954	54.4595	7.01355	n/a	76.6162	3.93826
ELM89_DM_112	ESG29	2013-04-01, 01:42	-0.000480163	81.1532	2.82961	0.0484794	6.18912	80.4559	2.89412	0.0554843	10.3484	0.0950853	10.7455	0.0124292	2.89412	0.269334	---	13.8615	13.6994	16.8694	670.074	0.0320071	12.814	0.620511	2.04107	1.3295	21.0885	75.2183	103.404	143.875	10830.7	3.7192	84.7693	301.825	79.6298	2.2904	78.866	2.24101	79.7079	2.36993	430.819	230.622	77.9227	17.0208	n/a	78.866	2.24101
ELM89_DM_113	ESG29	2013-04-01, 02:03	-0.00136529	89.5326	3.89405	0.045095	16.8172	87.3793	4.57724	0.0647834	31.792	0.102225	32.1198	0.0114444	4.57724	0.142505	---	17.0855	16.5893	2.52858	328.92	0.00955283	6.2833	0.478029	1.305	1.27731	12.5139	35.5676	47.3936	69.4085	8529.87	0.519276	15.8488	46.4922	73.3561	3.33866	71.8086	2.86336	72.3951	2.99758	766.394	669.74	90.4692	37.5815	n/a	71.8086	2.86336
ELM89_DM_114	ESG29	2013-04-01, 02:25	-0.00045995	83.7828	3.98481	0.0480957	8.49969	83.093	4.069	0.0548112	14.2266	0.0909508	14.797	0.0120347	4.069	0.274988	---	30.8017	31.66	10.2687	865.056	0.0144453	15.5709	1.48123	4.36745	3.96926	40.507	99.2654	125.022	171.437	8052.39	1.77382	88.5406	148.616	77.1176	3.11922	76.4365	3.05742	78.339	3.38484	403.556	318.563	65.1784	9.11642	n/a	76.4365	3.05742
ELM89_DM_115	ESG29	2013-04-01, 03:08	0	84.2747	2.82984	0.0461879	3.95581	84.2747	2.82984	0.0461879	3.95581	0.0755671	4.86379	0.011866	2.82984	0.581819	---	15.5509	15.6932	27.832	1861.38	0.0202902	28.2331	1.19429	4.41613	2.22245	45.3329	190.903	339.495	548.97	11597.9	10.3674	303.819	873.711	76.0426	2.13924	76.1692	2.15346	76.6118	2.276	6.39313	95.2366	66.1073	4.46126	n/a	76.1692	2.15346
ELM89_DM_117	ESG29	2013-04-01, 03:51	-0.00305271	93.5603	2.47701	0.0305271	18.4239	88.6743	4.44847	0.0740392	40.062	0.115124	40.3082	0.0112772	4.44847	0.110361	---	7.98378	7.92196	1.74968	96.5407	0.00570523	3.21656	0.152281	0.55919	0.402576	3.99897	10.3393	13.8757	21.6274	9396.83	0.482057	14.5868	45.1014	72.2908	3.19787	69.9471	1.78912	69.1627	1.86766	1041.66	808.471	131.095	58.09	n/a	69.9471	1.78912
ELM89_DM_118	ESG29	2013-04-01, 04:34	0	86.5114	2.14437	0.0453976	9.11218	86.5114	2.14437	0.0453976	9.11218	0.0723538	9.3611	0.0115592	2.14437	0.229073	---	12.1821	12.3831	8.64382	423.33	0.0244498	4.6493	0.675875	2.17224	1.31799	18.1052	45.1397	61.9393	92.6784	8555.64	1.59397	38.0574	137.897	74.0878	1.57963	74.2791	1.63004	74.3483	1.69071	-35.3219	221.127	68.2931	8.1487	n/a	74.2791	1.63004
ELM89_DM_119	ESG29	2013-04-01, 04:55	0	88.2664	2.7314	0.0440547	18.9041	88.2664	2.7314	0.0440547	18.9041	0.0688174	19.1004	0.0113293	2.7314	0.143002	---	8.87542	8.99676	1.77716	218.665	0.0073021	3.04188	0.28052	0.852383	0.704058	7.08527	22.4074	34.3798	57.9699	9104.41	0.362464	8.19751	31.9934	72.623	1.97249	72.927	2.11706	72.0907	2.2001	-108.705	465.28	85.4108	18.8866	n/a	72.927	2.11706
ELM89_DM_120	ESG29	2013-04-01, 05:38	-0.000336182	82.2915	4.06442	0.0461421	18.9886	81.7951	4.10893	0.0510733	19.5672	0.0860929	19.994	0.0122257	4.10893	0.205509	---	12.6578	12.2047	5.83131	271.08	0.00746496	9.74171	0.602816	1.83367	1.24164	15.3258	32.7534	38.9962	56.8111	9485.97	2.03893	90.1006	167.787	78.3339	3.19921	78.0017	3.26513	79.0352	3.46707	243.135	450.848	70.6512	8.09551	n/a	78.0017	3.26513
ELM89_DM_121	ESG29	2013-04-01, 06:00	0	87.5449	2.1288	0.0383921	10.5987	87.5449	2.1288	0.0383921	10.5987	0.0604661	10.8104	0.0114227	2.1288	0.196921	---	17.1483	17.4255	2.78131	404.427	0.0109807	12.41	0.862755	2.70883	2.07692	20.3085	47.0547	59.0501	82.2242	9279.89	1.97868	122.561	173.223	73.2182	1.54985	74.0317	1.61135	75.7067	1.82679	-459.214	279.804	53.1325	4.46191	n/a	74.0317	1.61135
ELM89_DM_123	ESG29	2013-04-01, 07:05	-0.000400063	85.7342	5.99391	0.050016	8.17246	85.1195	6.03665	0.0558497	12.6635	0.0904676	14.0287	0.0117482	6.03665	0.430307	---	20.0741	17.3205	10.6477	886.525	0.0771439	21.395	5.29458	11.4132	7.08824	64.1932	122.248	126.284	170.617	8766.67	1.63609	96.6461	140.269	75.2923	4.51869	74.5285	4.46513	76.1643	5.04226	445.432	281.499	68.0428	8.21204	n/a	74.5285	4.46513
ELM89_DM_2.1	ESG29	2012-08-07, 11:33	0.00283748	82.083	2.58026	0.0529689	6.07458	86.514	3.29021	0.00920386	193.087	0.0146685	193.115	0.0115588	3.29021	0.0170376	---	---	---	---	281.989	0.018601	5.88732	0.556023	1.52925	1.17527	11.8125	32.0767	42.0178	65.6185	8068.17	0.838845	18.1912	68.855	74.0856	2.42362	77.5487	2.01618	77.5449	2.11851	---	---	-6.60877	-36.6546	n/a	77.5487	2.01618
ELM89_DM_2.2	ESG29	2013-03-31, 18:30	0.0121189	61.4822	3.10732	0.132423	23.1624	78.6969	12.9309	0.0723344	72.236	0.126733	73.3842	0.012707	12.9309	0.176209	---	2267.49	2360.16	55.6083	151.178	0.0336802	3.32191	0.20613	0.732023	0.58766	5.71313	15.5592	24.3856	45.3168	8815.38	0.368196	6.29875	22.6375	81.3984	10.4594	93.3083	4.8467	93.8244	4.03869	994.48	1468.23	-195.023	-239.313	n/a	93.3083	4.8467
ELM89_DM_3	ESG29	2012-08-07, 11:52	0.000962686	85.811	2.1769	0.0462037	7.90151	87.3284	2.27724	0.031747	21.0685	0.0501243	21.1912	0.011451	2.27724	0.107461	---	---	---	---	605.712	0.00948788	7.6806	0.589527	2.38108	1.43019	24.1122	67.2447	98.2711	154.226	10088.2	2.58929	49.2819	222.189	73.3986	1.66198	74.8096	1.65585	74.4652	1.67835	-989.614	623.151	43.6028	14.2302	n/a	74.8096	1.65585
ELM89_DM_4	ESG29	2012-08-07, 12:11	0.0018507	80.5365	1.96194	0.0473319	5.67774	83.3198	2.41688	0.0191182	64.0266	0.0316374	64.0722	0.0120019	2.41688	0.0377212	---	---	---	---	392.033	0.0165945	11.8966	0.877623	2.41249	1.88667	18.3973	43.3718	56.73	79.5821	8431.02	1.13748	60.0603	91.6089	76.9089	1.84775	79.5787	1.57644	80.7249	1.87829	---	---	43.3477	11.3304	n/a	79.5787	1.57644
ELM89_DM_6	ESG29	2012-08-07, 13:25	0.000704574	82.6799	1.23872	0.0455331	8.65117	83.745	1.78723	0.0349939	32.5708	0.0576148	32.6198	0.011941	1.78723	0.05479	---	---	---	---	106.448	0.00793488	4.05432	0.196219	0.610635	0.503645	4.67998	12.3913	15.4897	23.3632	8293.38	0.512836	17.6511	42.4013	76.5208	1.35952	77.6943	1.02831	77.9741	1.08116	-710.347	906.42	55.5653	15.6507	n/a	77.6943	1.02831
ELM89_DM_7.1	ESG29	2012-08-07, 13:43	-4.0418e-13	80.9665	1.99694	0.0480388	1.41667	80.9665	1.99694	0.0480388	1.41667	0.0818066	2.44841	0.0123508	1.99694	0.815607	---	---	---	---	1324.93	0.0245037	32.1624	2.74524	8.32334	3.24125	74.5562	185.109	198.618	232.504	12132.2	17.9749	794.797	1455.37	79.1307	1.57054	79.0897	1.57414	78.8159	1.72735	100.152	33.5103	82.5144	2.0554	n/a	79.0897	1.57414
ELM89_DM_7.2	ESG29	2013-03-31, 19:36	-0.000294555	85.2281	3.42863	0.0457731	13.2979	84.7774	3.46918	0.0500989	14.8268	0.0814797	15.2272	0.0117956	3.46918	0.227828	---	27.8858	27.6655	9.01206	705.696	0.0149675	14.8018	1.54863	4.35533	2.81434	37.7623	86.9401	97.7347	128.111	9291.09	2.95562	162.188	251.902	75.5944	2.60719	75.3587	2.63337	77.0914	2.89129	198.573	344.405	62.1672	6.19586	n/a	75.3587	2.63337
ELM89_DM_8.1	ESG29	2012-08-07, 14:02	0.000246562	81.6415	1.99028	0.0429277	5.98006	82.0064	2.03987	0.0392586	11.4579	0.0660067	11.6381	0.0121942	2.03987	0.175275	---	---	---	---	682.828	0.0192285	12.4066	0.709142	2.64929	1.97629	27.0849	77.3728	104.271	142.339	9778.24	1.65099	58.3822	134.789	78.1332	1.58419	78.928	1.58352	78.4152	1.67651	-400.646	298.877	74.2385	5.73818	n/a	78.928	1.58352
ELM89_DM_9.1	ESG29	2012-08-07, 14:21	0.00177121	83.76	1.8821	0.0486727	4.87855	86.5263	2.18062	0.0217551	44.0875	0.0346668	44.1413	0.0115572	2.18062	0.0494009	---	---	---	---	329.008	0.0088015	17.8631	1.51653	3.5457	2.53885	22.0042	42.245	45.9683	61.3333	8778.25	1.90916	156.754	159.911	74.0752	1.60606	76.4034	1.44923	75.383	1.75049	---	---	66.825	5.68806	n/a	76.4034	1.44923
ELM89_DM_9.2	ESG29	2013-03-31, 21:24	0.000895362	84.7862	3.50691	0.0304245	16.1375	86.1789	3.8727	0.0167363	88.3307	0.0267769	88.4156	0.0116038	3.8727	0.0438011	---	11.9316	12.3855	2.79065	515.002	0.00561264	7.93765	0.774964	2.48062	1.93815	21.2209	56.7268	75.0058	111.366	8634.28	0.962812	37.5447	81.6332	74.372	2.86365	77.1655	2.73284	76.5168	2.92013	---	---	46.5767	18.1792	n/a	77.1655	2.73284
ELM89_DM-1.2	ESG29	2013-03-31, 18:08	0.00056415	92.147	3.30607	0.0531	9.09856	93.095	3.46247	0.0447607	21.755	0.0662936	22.0288	0.0107417	3.46247	0.157179	---	7.56712	7.3749	5.86238	662.591	0.00483253	8.50581	0.4577	1.98738	1.48478	19.6139	68.6559	112.137	186.253	10357.8	1.55139	42.1267	142.956	68.8763	2.37212	69.099	2.31277	70.5167	2.4228	-69.7251	531.431	34.7932	16.1546	n/a	69.099	2.31277
Pre-Mesozoic domains
ELM89_DM_10.2	ESG29	2013-03-31, 21:45	0	5.2095	4.55078	0.0724237	3.85347	5.2095	4.55078	0.0724237	3.85347	1.91684	5.96312	0.191957	4.55078	0.763154	---	4.77384	4.67032	136.322	2580.55	0.0466974	14.7634	0.352755	1.77746	0.500269	28.3132	200.743	506.962	1182.71	16110.5	328.526	368.144	1711.46	1131.97	47.244	1138.96	50.2625	1138.48	48.6782	996.987	78.2936	919.957	49.9387	-0.142407	996.987	78.2936
ELM89_DM_101	ESG29	2013-03-31, 17:04	0	4.79534	3.64106	0.0831363	1.47037	4.79534	3.64106	0.0831363	1.47037	2.39041	3.92674	0.208536	3.64106	0.927247	---	4.66154	4.54408	57.0482	1077.27	0.022971	13.2467	0.457662	1.44184	0.183311	16.425	86.6117	199.308	394.321	13342.3	99.7513	150.772	478.342	1221.01	40.5011	1217.81	42.9464	1228.02	42.3381	1271.57	28.6901	1066.28	41.4566	0.0422749	1271.57	28.6901
ELM89_DM_103	ESG29	2013-03-31, 19:58	7.81843e-05	4.74179	3.68419	0.0791014	1.90854	4.74849	3.68554	0.0779926	2.18425	2.26464	4.28418	0.210593	3.68554	0.860268	---	16.3473	16.4101	6.35747	521.996	0.0073493	8.10041	0.374284	0.964198	0.0787999	10.4261	47.8945	95.1501	178.118	11079.8	22.4748	33.2725	106.571	1231.98	41.33	1237.28	44.1827	1243.14	43.2147	1145.82	43.401	982.254	54.7087	-0.0798216	1145.82	43.401
ELM89_DM_106	ESG29	2013-03-31, 22:50	1.24349e-05	5.1508	2.23039	0.0755562	2.39032	5.15196	2.23051	0.0753793	2.40794	2.01735	3.28228	0.194101	2.23051	0.679561	---	7.48264	7.529	34.206	137.66	0.00452564	16.2277	0.0621573	0.20582	0.143357	1.83637	9.1281	25.0022	78.8415	11572.1	79.142	98.8726	407.645	1143.55	23.3727	1147.1	24.8678	1150.87	24.1877	1077.76	48.3307	932.908	30.4932	-0.0643419	1077.76	48.3307
ELM89_DM_107	ESG29	2013-03-31, 23:11	0	4.2331	5.40019	0.0826177	4.85474	4.2331	5.40019	0.0826177	4.85474	2.69101	7.26158	0.236233	5.40019	0.743666	---	26.24	26.0977	63.6775	997.332	0.00923438	53.2211	0.873372	2.4338	0.779929	22.0116	92.3712	174.981	323.713	10765.7	22.4331	75.0649	94.9617	1367.09	66.5224	1375.15	72.4491	1387.93	74.9313	1259.35	94.8912	1192.94	83.2435	-0.0919572	1259.35	94.8912
ELM89_DM_108	ESG29	2013-03-31, 23:55	1.8906e-05	4.07791	3.02109	0.098933	0.847999	4.07931	3.02118	0.098672	0.870881	3.3351	3.1442	0.24514	3.02118	0.960876	---	4.79121	4.39051	3.59585	299.678	0.0038585	1.21202	0.0943703	0.46638	0.182742	6.20583	34.3102	31.3934	55.8609	12770.6	89.5338	9.70119	365.111	1413.36	38.3434	1397.02	41.0483	1417.58	38.4687	1598.36	16.2534	209.9	93.7507	0.125966	1598.36	16.2534
ELM89_DM_116	ESG29	2013-04-01, 03:30	8.34191e-07	3.32002	5.25133	0.103026	1.30608	3.32007	5.25133	0.103015	1.30629	4.27813	5.41136	0.301198	5.25133	0.970426	---	46.8241	47.8959	242.322	3079.85	0.543902	220.352	24.229	39.2502	9.79297	200.691	416.434	431.597	532.62	10414.5	904.234	3288.54	3002.08	1697.25	78.3603	1699.59	88.3278	1754.05	91.5537	1678.34	24.13	1354.66	79.1276	-0.0126642	1678.34	24.13
ELM89_DM_122	ESG29	2013-04-01, 06:44	0	3.34675	3.61319	0.104359	0.657871	3.34675	3.61319	0.104359	0.657871	4.29939	3.67259	0.298797	3.61319	0.983825	---	9.81536	9.97785	72.1601	2127.73	0.0183641	16.1192	2.35027	5.90472	0.916239	55.1241	220.033	395.877	599.645	9462.3	137.508	125.786	460.205	1685.34	53.5852	1683.26	60.0945	1693.04	55.5528	1702.24	12.1155	1477.72	55.8309	0.0111534	1702.24	12.1155
ELM89_DM_5.1	ESG29	2012-08-07, 12:30	8.27524e-06	3.99817	1.73596	0.103577	1.38547	3.99877	1.73598	0.103464	1.38829	3.56749	2.22283	0.250077	1.73598	0.780977	---				365.967	0.0336609	1.44245	0.291589	1.37828	0.0920766	16.5109	49.9897	47.1922	59.2265	12634.9	165.702	63.8625	662.506	1438.87	22.3872	1415.7	24.0438	1438.53	22.6901	1686.36	25.6185	1464.6	30.4173	0.160501	1686.36	25.6185
ELM89_DM_5.2	ESG29	2013-03-31, 18:53	1.23308e-05	4.28062	4.18459	0.0993259	3.36047	4.28157	4.18461	0.0991557	3.36845	3.19313	5.37191	0.233559	4.18461	0.77898	---	5.02945	4.94236	16.1857	233.663	0.0286897	0.579677	0.138154	0.898802	0.117974	14.0037	38.4312	20.5714	17.471	12197.2	236	19.5168	1010.23	1353.13	51.0752	1332.08	54.3617	1353.21	51.2209	1607.48	62.7916	1322.23	95.6171	0.171324	1607.48	62.7916
ELM89_DM_8.2	ESG29	2013-03-31, 21:02	1.65733e-05	3.18445	4.62489	0.10746	0.770809	3.1854	4.62493	0.107234	0.786953	4.64161	4.69141	0.313932	4.62493	0.985831	---	6.33466	6.37797	75.8254	1783.97	0.0172962	0.819227	0.513319	2.11563	0.0406646	28.6869	165.983	304.866	490.757	12652.6	104.415	38.8526	332.505	1760.03	71.2339	1761.1	81.0278	1763.73	72.3292	1752.13	14.4023	1519.63	93.0711	-0.00511769	1752.13	14.4023
TUNG- Tungstonia pluton- Tungstonia Canyon, Kern Mountains (39.68211,-114.1722)
Dark rims
TUNG-115TR	ESG11	2012-08-14; 3:29:50 AM	---	---	---	---	---	---	---	---	---	---	---	---	---	---	193.716	1.75202	1.49168	20.4294	4775.59	0.00240742	4.66133	0.154857	2.02988	0.497758	38.0169	380.698	886.612	1887.84	19189.3	---	64.6409	4326.81	---	---	---	---	---	---	---	---	---	---	---
TUNG-116TR	ESG11	2012-08-14; 4:02:08 AM	---	---	---	---	---	---	---	---	---	---	---	---	---	---	331.979	2.82852	3.05238	41.2552	8114.24	0.0225832	11.0546	0.78013	4.34543	1.55279	84.8891	714.805	1495.98	2673.43	17388	---	185.98	7039.27	---	---	---	---	---	---	---	---	---	---	---
TUNG-3.2R	ESG11	2011-05-04, 18:04	-2.18136e-05	82.2801	1.96006	0.0467052	0.9397	82.2467	1.96026	0.047027	1.05079	0.0788369	2.22414	0.0121585	1.96026	0.881358	---	---	---	---	6537.17	0.150003	20.1979	0.683919	4.57629	2.30477	75.2145	593.507	1248.55	2167.95	16316.6	55.8154	300.259	4592.5	77.9063	1.51798	77.9614	1.52247	77.9249	1.5332	49.5581	25.0924	76.1202	3.22457	n/a	77.9614	1.52247
TUNG-105TR	ESG11	2012-08-13; 10:44:30 PM	---	---	---	---	---	---	---	---	---	---	---	---	---	---	155.075	---	1.67866	87.1949	4907.27	0.0446606	4.66865	0.260773	0.752123	0.431156	42.7661	433.685	944.873	2352.54	23297.3	---	81.2888	8029.74	---	---	---	---	---	---	---	---	---	---	---
tung-103	ESG11	2013-12-13, 20:30	0.000439589	88.3175	1.88171	0.0477312	1.92658	89.0453	1.89456	0.0411995	4.82896	0.0637944	5.18731	0.0112302	1.89456	0.36523	---	3.05109	2.9658	33.0868	5450.4	0.015611	9.8245	0.291947	2.87681	1.552	59.0998	419.27	940.928	1653.01	15964.8	31.6602	114.264	2796.15	71.9913	1.35633	72.5586	1.36275	72.5553	1.36773	-276.348	122.841	-15.0232	-24.5798	n/a	72.5586	1.36275
TUNG-103TR	ESG11	2012-08-13; 6:41:05 PM	---	---	---	---	---	---	---	---	---	---	---	---	---	---	267.801	2.40913	2.06089	22.3549	5850.14	0.0101145	7.27576	0.309816	2.78579	0.912861	55.7172	498.688	1084.76	1946.77	16990.7	---	78.693	3243.13	---	---	---	---	---	---	---	---	---	---	---
TUNG-9R	ESG11	2012-08-14; 12:49:12 AM	---	---	---	---	---	---	---	---	---	---	---	---	---	---	129.992	2.90094	2.53849	355.111	4794.53	0.0257157	5.69167	0.285732	2.46544	0.422389	44.2809	420.771	874.383	2016.62	21800.9	---	110.892	8522.36	---	---	---	---	---	---	---	---	---	---	---
TUNG-8R	ESG11	2012-08-13; 11:17:16 PM	---	---	---	---	---	---	---	---	---	---	---	---	---	---	272.403	---	2.79988	83.7156	7514.78	0.00153636	11.9497	0.686293	4.94992	1.82263	88.8324	672.085	1324.43	2249.44	16782.5	---	433.765	8813.86	---	---	---	---	---	---	---	---	---	---	---
TUNG-5R	ESG11	2012-08-13; 10:22:53 PM	---	---	---	---	---	---	---	---	---	---	---	---	---	---	182.441	---	1.6817	30.2324	5541.4	0.00199522	5.06945	0.25974	2.40117	0.439583	45.3231	464.065	1030.25	2308.39	20704.5	---	79.9246	6533.01	---	---	---	---	---	---	---	---	---	---	---
"Inner rim" domains- magmatic ages
TUNG-9.1	ESG11	2011-05-04, 21:07	0.000225454	96.8301	3.15231	0.0479494	4.22735	97.2379	3.18032	0.0446138	8.78606	0.0632608	9.34395	0.0102841	3.18032	0.340362	---	---	---	---	1289.97	0.107363	12.1778	0.527804	2.28809	1.84512	31.5146	133.179	221.38	368.676	8978.85	2.896	101.641	280.42	65.9567	2.08694	66.1838	2.08592	66.1737	2.21529	-77.7633	214.958	62.3864	5.95789	n/a	66.1838	2.08592
tung-9.2	ESG11	2013-12-13, 23:07	0.00196693	91.1156	1.64454	0.0451305	5.2476	94.5749	2.07549	0.0149439	71.8324	0.0217866	71.8624	0.0105736	2.07549	0.0288815	---	13.4915	13.2406	20.3913	1821.2	0.0161731	19.6114	0.756196	3.58405	2.56741	46.8743	176.429	298.859	488.319	8972.04	4.28581	156.465	390.504	67.8041	1.39989	70.5686	1.17505	70.0628	1.27722	---	---	34.3539	13.7179	---	70.5686	1.17505
TUNG-9T	ESG11	2012-08-14; 12:27:28 AM	---	---	---	---	---	---	---	---	---	---	---	---	---	---	286.42	12.8655	13.0448	11.935	1783.54	0.00296194	20.3715	0.854342	3.82239	2.86485	50.7081	195.292	314.196	499.591	9470.41	---	140.121	304.899	---	---	---	---	---	---	---	---	---	---	---	69.5	1.9		age from wa of .1 and .2, sqrt mswd propogated into err
TUNG-28.1	ESG11	2011-05-05, 08:44	0.000142884	96.1499	2.75262	0.0483781	4.02511	96.4061	2.75906	0.0462685	5.31579	0.0661732	5.98916	0.0103728	2.75906	0.460676	---	---	---	---	994.997	0.0152422	22.1705	0.686734	2.55908	1.75071	27.205	99.1232	175.516	316.295	9424.36	9.5852	252.609	921.615	66.5229	1.82597	66.6144	1.83452	66.6338	1.91336	10.5866	127.877	64.0735	3.88281	n/a	66.6144	1.83452	2.13451e+14
TUNG-27.1	ESG11	2011-05-05, 07:52	-0.00035018	96.1967	2.61967	0.046187	3.80048	95.5741	2.65934	0.0513243	7.81028	0.074043	8.25061	0.0104631	2.65934	0.322321	---	---	---	---	819.524	0.00917133	17.4297	0.323927	1.65994	1.25558	18.4712	79.8311	155.358	290.346	9093.43	4.00843	177.071	385.597	67.0989	1.77514	66.7657	1.74912	66.8873	1.88803	254.42	179.59	69.8035	5.33695	n/a	66.7657	1.74912	9.31887e+13
TUNG-27.1T	ESG11	2012-08-14; 7:15:32 AM	---	---	---	---	---	---	---	---	---	---	---	---	---	---	143.038	10.2055	9.57023	3.08398	1097.85	0.00184463	23.398	0.47674	2.67021	1.78305	27.8854	111.954	196.793	335.997	9314.96	---	206.678	322.23	---	---	---	---	---	---	---	---	---	---	---	66.7657	1.74912		age from 27.1
TUNG-4.2	ESG11	2012-01-22, 20:19	0.000847519	94.0404	3.03761	0.0517652	8.3868	95.555	3.43839	0.0391388	34.6711	0.0564749	34.8412	0.0104652	3.43839	0.0986875	---	---	---	---	712.961	0.00860983	8.98462	0.497285	1.75105	1.28399	18.7655	70.785	128.286	219.868	9668.24	0.947329	33.9444	89.0872	67.1123	2.29561	67.8109	2.08637	67.6277	2.30117	-408.621	905.859	59.0883	19.6788	n/a	67.8109	2.08637
TUNG-335	ESG11	2014-03-30, 19:19	0.0016328	93.9736	1.30656	0.0494497	3.46663	96.9169	2.25616	0.0246868	61.1718	0.035121	61.2134	0.0103181	2.25616	0.0368573	---	---	---	---	---	---	---	---	---	---	---	---	---	---	7859.32	2.34485	75.7751	220.354	66.174	1.48536	68.0597	0.898188	67.9447	0.981401	---	---	35.339	22.4458	---	68.0597	0.898188
TUNG-22.1	ESG11	2011-05-05, 04:58	-0.000227972	93.7688	2.4254	0.0490959	3.02331	93.3728	2.44371	0.0524357	5.29714	0.0774297	5.83364	0.0107098	2.44371	0.418899	---	---	---	---	957.227	0.0324701	14.9731	0.235861	1.31374	1.06461	16.8567	92.2681	182.813	337.103	9840.52	6.1855	161.802	580.006	68.6724	1.66925	68.2382	1.65406	68.1898	1.73232	303.464	120.734	79.1357	5.80426	n/a	68.2382	1.65406
TUNG-25.2	ESG11	2011-05-05, 06:43	1e-32	92.3514	2.03956	0.0480432	3.10857	92.3514	2.03956	0.0480432	3.10857	0.0717281	3.71793	0.0108282	2.03956	0.548574	---	---	---	---	612.324	0.00976566	13.9178	0.304466	1.53107	1.05541	16.728	62.042	109.287	197.821	9494.34	5.06125	126.205	467.414	69.4279	1.40842	69.3735	1.41579	69.2989	1.4783	100.366	73.5282	72.3223	3.24336	n/a	69.3735	1.41579
TUNG-25.3	ESG11	2011-05-05, 07:00	-0.000322127	93.8981	1.86182	0.0454159	3.67126	93.3389	1.90886	0.0501487	7.41163	0.0740796	7.65349	0.0107136	1.90886	0.249411	---	---	---	---	2290.08	0.0138785	33.3992	1.01327	3.47649	2.73547	45.7441	231.876	427.88	710.862	8792.66	3.76456	174.755	353.485	68.6973	1.30437	68.4604	1.27808	68.1861	1.39051	200.883	172.089	74.7293	4.67124	n/a	68.4604	1.27808	8.82662e+13
TUNG-25T	ESG11	2012-08-14; 6:11:01 AM	---	---	---	---	---	---	---	---	---	---	---	---	---	---	243.622	15.3342	15.2297	3.31964	1979.1	0.00336682	29.5612	0.769779	3.32373	2.52924	42.31	201.648	360.848	610.307	9036.49	---	135.818	276.648	---	---	---	---	---	---	---	---	---	---	---	68.4604	1.27808		age from .3
TUNG-23.1	ESG11	2011-05-05, 05:34	0.000142273	92.6145	2.84965	0.0475408	3.39165	92.8602	2.86197	0.045438	5.84732	0.0674669	6.51015	0.0107689	2.86197	0.439617	---	---	---	---	1915.1	0.0215384	22.2309	0.990166	4.2011	2.64692	48.8321	197.379	334.729	536.274	9017.13	4.49781	178.65	416.563	69.0495	1.96563	69.2209	1.9704	69.0077	2.1177	-33.167	141.84	69.6243	4.07813	n/a	69.2209	1.9704
TUNG-14.1	ESG11	2011-05-05, 00:36	-0.000346415	92.5154	2.14996	0.0468375	3.80029	91.9232	2.1971	0.0519158	7.6708	0.0778709	7.97925	0.0108786	2.1971	0.275352	---	---	---	---	477.024	0.0501135	12.0203	0.389003	1.37919	0.940042	13.6665	49.9917	82.5238	136.977	9389.07	3.5044	104.68	324.211	69.7496	1.52421	69.356	1.49378	69.2503	1.57236	280.705	175.549	79.0351	7.23911	n/a	69.356	1.49378
TUNG-348	ESG11	2014-03-31, 00:42	-0.000649458	91.8334	2.02124	0.0490639	3.12573	90.7375	2.29706	0.058505	14.8095	0.0889012	14.9866	0.0110208	2.29706	0.153274	---	---	---	---	---	---	---	---	---	---	---	---	---	---	9237.32	3.0285	135.697	278.118	70.656	1.61415	69.6739	1.40958	69.7244	1.55507	547.774	323.475	81.8081	10.9077	n/a	69.6739	1.40958
TUNG-1.2	ESG11	2011-05-04, 16:25	0.000248816	92.1511	1.56839	0.0461114	3.86354	92.5795	1.60247	0.0424199	7.48479	0.0631766	7.65441	0.0108015	1.60247	0.209353	---	---	---	---	2460.03	0.0133095	29.4948	0.951938	4.22755	3.1634	56.4014	251.351	433.193	702.573	9640.93	5.38683	217.37	496.402	69.2577	1.1039	69.6927	1.10015	69.2966	1.21146	-202.631	187.635	68.7354	5.27696	n/a	69.6927	1.10015
TUNG-1.2T	ESG11	2012-08-13; 8:22:53 PM	---	---	---	---	---	---	---	---	---	---	---	---	---	---	382.435	19.58	19.7945	4.80635	2384.76	0.0040581	34.5582	1.15757	4.73018	3.39085	61.761	249.441	409.865	660.945	9479.11	---	209.342	429.067	---	---	---	---	---	---	---	---	---	---	---	70.8	1.2		age from wa of .2 and .3, sqrt mswd propogated into err
tung-1.3	ESG11	2013-12-13, 22:15	0.00157002	88.7879	1.59666	0.0492589	3.58339	91.4578	1.78766	0.0254712	26.6925	0.0383998	26.7523	0.010934	1.78766	0.0668224	---	13.6936	13.9172	27.4741	1406.92	0.0103902	28.5829	0.814861	3.27725	2.05833	34.3716	132.926	241.954	416.525	9488.33	8.4608	247.635	751.216	70.1026	1.2464	72.0371	1.15699	71.9776	1.23094	---	---	35.9358	10.9623	---	72.0371	1.15699
TUNG-21.1	ESG11	2011-05-05, 04:41	-0.000154447	92.0639	1.97747	0.0455391	3.64145	91.8002	1.9981	0.047815	5.8725	0.0718162	6.20312	0.0108932	1.9981	0.322112	---	---	---	---	2289.36	0.0214967	32.1754	0.886178	3.6308	3.1346	52.5554	226.886	404.576	666.771	8889.93	4.51781	196.086	415.927	69.8425	1.38799	69.8086	1.38303	69.9695	1.49924	89.095	139.197	68.2652	4.09474	n/a	69.8086	1.38303
TUNG-21T	ESG11	2012-08-14; 4:56:02 AM	---	---	---	---	---	---	---	---	---	---	---	---	---	---	296.459	18.4899	18.8662	8.50172	2188.39	0.00190717	33.6176	1.05883	4.12487	3.2772	55.5847	235.068	397.36	657.263	9082	---	187.175	367.659	---	---	---	---	---	---	---	---	---	---	---	69.8086	1.38303		age from 21.1
TUNG-16.2	ESG11	2011-05-05, 02:04	1e-32	91.5059	2.85166	0.0459265	3.70747	91.5059	2.85166	0.0459265	3.70747	0.0692015	4.67732	0.0109283	2.85166	0.609678	---	---	---	---	1964.72	0.0901355	23.5419	0.701433	2.83295	2.54337	39.2072	188.105	363.884	644.662	8936.69	3.77461	146.881	345.4	70.0659	1.98722	70.1986	2.00009	69.9448	2.14389	-7.291	89.4903	71.7478	3.33705	n/a	70.1986	2.00009
TUNG-16.2T	ESG11	2012-08-14; 3:08:21 AM	---	---	---	---	---	---	---	---	---	---	---	---	---	---	284.489	11.1173	11.2395	5.4238	1688.12	0.00538957	19.9909	0.611571	2.50322	1.98813	33.2047	164.513	317.713	572.365	9386.59	---	90.2887	272.862	---	---	---	---	---	---	---	---	---	---	---	70.1986	2.00009		age from 16.2
TUNG-15.2	ESG11	2011-05-05, 01:11	1e-32	91.2675	2.93381	0.0476709	1.92573	91.2675	2.93381	0.0476709	1.92573	0.0720177	3.50937	0.0109568	2.93381	0.835994	---	---	---	---	1359.92	0.0108675	16.5855	0.720055	2.83375	1.51079	33.2445	131.143	234.14	407.219	12541.2	16.0044	290.38	1460.68	70.248	2.04975	70.2273	2.05436	69.7646	2.11968	81.9367	45.707	85.1512	3.64933	n/a	70.2273	2.05436	3.50805e+14
TUNG-108.1	ESG11	2012-01-22, 22:55	-0.00070589	90.9001	2.87299	0.045867	4.49564	89.7157	2.96989	0.0561587	11.0556	0.0863078	11.4475	0.0111463	2.96989	0.259435	---	---	---	---	2130.78	0.0217396	21.9752	0.548938	3.1126	2.56563	44.0815	210.076	393.551	677.201	10255.1	3.31825	101.005	301.629	71.4563	2.11046	70.6708	2.03121	69.7942	2.14633	457.682	245.236	101.111	11.7013	n/a	70.6708	2.03121
tung-108.2	ESG11	2013-12-13, 22:41	0.00224964	92.1541	1.81214	0.0466454	5.26693	96.178	2.27872	0.0119968	97.7386	0.0171985	97.7652	0.0103974	2.27872	0.0233081	---	15.22	14.8492	21.2376	2256.7	0.0167735	24.973	0.635713	2.82786	2.60745	46.1163	210.064	391.159	661.667	8638.75	3.95832	146.725	364.776	66.6798	1.51162	69.6437	1.27566	69.8132	1.38129	---	---	20.4558	14.5333	---	69.6437	1.27566
TUNG-108T	ESG11	2012-08-13; 11:29:48 PM	---	---	---	---	---	---	---	---	---	---	---	---	---	---	316.385	---	16.3552	14.6709	2455.17	0.0023996	28.8084	0.804845	3.65428	2.95826	52.742	246.073	444.506	744.153	9147.49	---	152.546	345.103	---	---	---	---	---	---	---	---	---	---	---	69.9342	1.08028		age from wa of .1 and .2
TUNG-2.1	ESG11	2011-05-04, 17:11	-0.000171557	90.4846	2.32139	0.045733	3.21755	90.1969	2.33225	0.0482596	4.78086	0.0737723	5.31941	0.0110869	2.33225	0.438443	---	---	---	---	1057.83	0.00447604	20.8072	0.591443	2.22495	1.60435	25.4013	104.366	196.021	362.912	9404.79	7.92396	211.748	716.996	71.0772	1.6486	71.0052	1.6474	70.8398	1.72119	110.987	112.86	75.9278	4.52054	n/a	71.0052	1.6474
TUNG-2.1T	ESG11	2012-08-13; 8:12:06 PM	---	---	---	---	---	---	---	---	---	---	---	---	---	---	304.673	17.6956	17.4505	10.7296	1984.76	0.00406659	30.4526	1.2067	4.70544	3.00781	51.7869	208.367	340.136	533.343	9368.27	---	297.99	468.166	---	---	---	---	---	---	---	---	---	---	---	71.0052	1.6474		age from 2.1
tung-205.1	ESG11	2013-12-14, 02:37	0.00168111	90.5451	1.59075	0.043804	4.11429	93.4669	1.82542	0.0181027	41.9429	0.0267047	41.9826	0.010699	1.82542	0.0434804	---	20.4196	20.292	25.424	2003.51	0.0285014	29.1836	1.31799	5.41049	3.54188	68.014	220.637	311.364	467.463	9304.81	6.4247	285.519	581.725	68.6037	1.24567	71.1296	1.13863	69.9653	1.25649	---	---	52.3982	8.2682	---	71.1296	1.13863
TUNG-8.1	ESG11	2011-05-04, 20:31	1e-32	90.2553	2.48773	0.0452558	5.67149	90.2553	2.48773	0.0452558	5.67149	0.0691358	6.19311	0.0110797	2.48773	0.401693	---	---	---	---	2366.22	0.00784489	32.3205	1.0574	4.32151	3.37914	57.624	249.212	408.523	653.241	10015.2	5.83811	205.91	526.92	71.0314	1.75737	71.2275	1.78014	71.2032	1.88192	-42.9209	137.832	68.4206	2.79411	n/a	71.2275	1.78014
TUNG-8.1T	ESG11	2012-08-13; 10:55:20 PM	---	---	---	---	---	---	---	---	---	---	---	---	---	---	227.581	---	11.553	6.87065	983.725	0.00200456	27.1692	0.713791	2.75758	1.84543	27.9464	101.71	175.246	311.723	10009.7	---	214.748	794.69	---	---	---	---	---	---	---	---	---	---	---	71.2275	1.78014		age from 8.1
TUNG-11.1	ESG11	2011-05-04, 21:59	1e-32	90.0002	2.08344	0.0456568	1.8705	90.0002	2.08344	0.0456568	1.8705	0.069946	2.79991	0.0111111	2.08344	0.74411	---	---	---	---	1868.61	0.00443216	40.8368	1.47118	5.28617	2.983	52.7345	201.973	321.854	500.23	9351.61	15.1296	969.469	1361.67	71.2316	1.4759	71.3928	1.48384	71.1674	1.6791	-21.5289	45.2724	71.7391	1.83546	n/a	71.3928	1.48384
TUNG-11T	ESG11	2012-08-14; 1:21:22 AM	---	---	---	---	---	---	---	---	---	---	---	---	---	---	428.879	20.6396	20.4289	11.6629	2152.61	0.00245695	53.3641	1.46378	5.68681	3.25976	56.6175	227.173	374.851	611.544	9883.33	---	878.68	1704.71	---	---	---	---	---	---	---	---	---	---	---	71.3928	1.48384		age from 11.1
TUNG-17.2	ESG11	2011-05-05, 02:39	0.000231757	89.7186	2.53798	0.0481155	3.01079	90.1069	2.55637	0.044687	6.34754	0.0683792	6.84297	0.0110979	2.55637	0.373576	---	---	---	---	2358.3	0.0154943	34.2979	1.23354	4.472	3.18314	57.9899	257.07	421.176	673.347	9266.72	4.96417	233.361	445.379	71.1477	1.8088	71.3952	1.80991	71.2174	1.98399	-73.7532	155.178	70.3764	3.82242	n/a	71.3952	1.80991
TUNG-17.2T	ESG11	2012-08-14; 4:12:58 AM	---	---	---	---	---	---	---	---	---	---	---	---	---	---	290.973	13.9471	13.1183	3.24833	1612.24	0.00535917	24.8537	0.932703	3.39255	2.23877	40.6145	172.449	287.877	459.729	9788.17	---	145.96	320.393	---	---	---	---	---	---	---	---	---	---	---	71.3952	1.80991		age from 17.2
TUNG-13.2	ESG11	2011-05-05, 00:19	0.000381302	89.9172	1.81641	0.0457691	2.78285	90.5592	1.85117	0.0400956	7.81117	0.0610472	8.02752	0.0110425	1.85117	0.230603	---	---	---	---	1690.09	0.0439718	24.2369	0.849726	2.90159	2.03126	34.5664	160.621	299.14	517.113	9779.43	8.52019	207.565	766.111	70.7943	1.30335	71.4484	1.29797	71.0719	1.35293	-345.919	201.5	64.5859	6.45607	n/a	71.4484	1.29797	1.90262e+14
TUNG-26.1	ESG11	2011-05-05, 07:35	-0.000188304	88.6028	1.59517	0.0525183	3.6938	88.2937	1.63288	0.055267	6.06629	0.0863053	6.28221	0.0113258	1.63288	0.259922	---	---	---	---	1021.49	0.0229157	12.3668	0.371621	1.98103	1.45577	24.8635	111.699	184.3	304.807	9387.48	3.43807	87.603	304.623	72.6007	1.17883	71.8907	1.156	72.1433	1.21622	422.068	135.398	82.2126	6.9178	n/a	71.8907	1.156
TUNG-19.1	ESG11	2011-05-05, 03:32	0.000100193	89.4666	1.93911	0.0445528	2.89048	89.6336	1.94807	0.0430675	4.57305	0.0662491	4.97069	0.0111565	1.94807	0.391911	---	---	---	---	773.659	0.0149697	16.2097	0.443243	1.97041	1.2283	19.5383	78.1621	142.002	268.993	9800.31	6.64937	163.451	594.896	71.5214	1.38559	71.9164	1.39412	71.7395	1.45026	-164.793	113.792	66.7124	4.10758	n/a	71.9164	1.39412
TUNG-19.1T	ESG11	2012-08-14; 4:23:37 AM	---	---	---	---	---	---	---	---	---	---	---	---	---	---	245.451	14.279	14.4575	18.9918	1316.29	0.00531295	22.4964	0.983837	3.38888	2.04172	37.1679	139.629	228.732	383.855	9483.87	---	205.168	619.544	---	---	---	---	---	---	---	---	---	---	---	71.9164	1.39412		age from 19.1
TUNG-307	ESG11	2014-03-30, 06:54	0.000132087	88.5886	1.69541	0.0520931	2.39098	88.8067	1.81839	0.0501525	10.6517	0.077866	10.8058	0.0112604	1.81839	0.168278	---	---	---	---	---	---	---	---	---	---	---	---	---	---	9662.9	4.69201	29.9474	415.658	72.1836	1.30526	71.9408	1.22037	72.4088	1.23652	201.055	247.312	52.6091	41.8478	n/a	71.9408	1.22037
TUNG-20.1	ESG11	2011-05-05, 03:49	0.000142598	88.6291	2.65186	0.047437	3.35387	88.8647	2.66516	0.0453292	5.84162	0.0703314	6.42087	0.0112531	2.66516	0.415077	---	---	---	---	968.953	0.00699248	17.2141	0.26887	1.79289	1.56038	22.2109	96.7943	181.686	324.435	9761.94	4.61715	181.269	409.214	72.1367	1.91184	72.3312	1.91633	72.5251	2.06311	-38.987	141.859	66.9729	3.97043	n/a	72.3312	1.91633
tung-202	ESG11	2013-12-13, 19:10	0.00151967	89.0528	1.61049	0.0401517	4.95625	91.6422	1.87983	0.0168843	48.8194	0.0254032	48.8555	0.010912	1.87983	0.0384774	---	8.98235	8.6271	13.1438	1049.09	0.0182014	18.5753	0.412898	1.84192	1.46419	21.4164	94.9442	193.941	361.851	9466.6	5.34995	145.893	476.428	69.9623	1.30806	72.6473	1.17934	71.861	1.23972	---	---	32.5694	14.1563	---	72.6473	1.17934
tung-119.2	ESG11	2013-12-14, 00:52	0.00118492	87.805	1.59911	0.0466099	8.80729	89.7829	1.78657	0.0287288	26.8345	0.0441189	26.8939	0.011138	1.78657	0.0664306	---	11.4651	11.5435	10.4683	629.753	0.0114286	15.2021	0.456614	1.61531	1.08242	19.1314	58.9914	106.837	193.075	8856.88	6.14252	138.085	539.344	71.4031	1.26863	73.0834	1.22359	73.2954	1.22811	---	---	26.4399	14.1661	---	73.0834	1.22359
tung-123.2	ESG11	2013-12-14, 01:45	0.000988185	87.1725	1.84008	0.0471278	2.97472	88.804	1.91193	0.0322808	13.7305	0.0501202	13.863	0.0112608	1.91193	0.137916	---	5.45136	5.63937	12.9505	1388.51	0.0079436	12.3995	0.321748	1.16658	0.899326	19.094	119.029	246.834	447.626	12028.3	11.1702	90.2872	973.731	72.1858	1.37244	73.5638	1.35463	73.3787	1.36932	-940.567	401.724	-8.25284	-25.5639	n/a	73.5638	1.35463	2.39177e+14	mixed with dark rim
Interior domains with Mesozoic ages																			4.06772		606.44										749.923			327.792
TUNG-317	ESG11	2014-03-30, 12:28	-0.000486436	82.5209	1.65986	0.0499081	2.28403	81.7815	1.75118	0.0569931	7.92632	0.0960878	8.11747	0.0122277	1.75118	0.21573	---	---	---	---	---	---	---	---	---	---	---	---	---	---	9413.01	6.60634	76.7756	545.161	78.3468	1.36369	77.4225	1.28472	77.6794	1.31681	490.305	174.836	107.69	21.1599	0.842093	77.4225	1.28472		mixed analysis?
TUNG-322	ESG11	2014-03-30, 14:29	-6.95014e-05	82.3267	2.67452	0.04621	4.50001	82.2205	3.38561	0.0472349	35.1476	0.0792108	35.3103	0.0121624	3.38561	0.0958816	---	---	---	---	---	---	---	---	---	---	---	---	---	---	9207.83	1.42666	14.605	117.452	77.931	2.62256	77.9658	2.08664	78.2258	2.12407	60.0816	837.65	63.1985	83.0472	n/a	77.9658	2.08664		mixed analysis older into younger
TUNG-302	ESG11	2014-03-29, 12:04	-0.000582379	82.5078	1.88337	0.0421346	3.96255	81.6244	2.29963	0.0506853	20.8246	0.0856177	20.9512	0.0122512	2.29963	0.109761	---	---	---	---	---	---	---	---	---	---	---	---	---	---	8575.14	2.63617	39.4717	217.505	78.4967	1.79419	78.1928	1.47565	77.8385	1.51105	225.539	481.354	100.812	37.257	n/a	78.1928	1.47565		mixed analysis?
TUNG-102.2	ESG11	2012-01-22, 19:21	-0.0009454	81.2547	4.74685	0.0386339	10.0212	79.8429	5.05499	0.0524826	26.9295	0.0906318	27.3998	0.0125246	5.05499	0.18449	---	---	---	---	59.3323	0.0110677	3.93636	0.122859	0.375867	0.156496	2.7374	6.75702	7.64655	9.77711	9512.21	0.854223	9.73816	69.4096	80.2373	4.03085	79.746	3.78939	78.1288	3.82752	305.504	613.559	172.882	68.3163	n/a	79.746	3.78939		migmatite zircon in metaseds?, low TE, Th/U, high Hf/Yb
TUNG-102.2T	ESG11	2012-08-13; 6:52:23 PM	---	---	---	---	---	---	---	---	---	---	---	---	---	---	29.4716	8.241	8.26972	1.6618	155.606	0.00263826	4.8344	0.165665	0.551139	0.334701	5.95548	16.7999	23.6645	32.2012	9844.17	---	13.9999	159.327	---	---	---	---	---	---	---	---	---	---	---	79.746	3.78939		migmatite zircon in metaseds?, low TE, Th/U, high Hf/Yb, age from 102.2
TUNG-346	ESG11	2014-03-31, 00:03	-0.000859717	79.0552	1.40184	0.0439624	2.88789	77.8123	1.67902	0.0564923	13.0211	0.100102	13.1289	0.0128514	1.67902	0.127888	---	---	---	---	---	---	---	---	---	---	---	---	---	---	9166.45	3.87728	110.422	306.519	82.3179	1.37335	81.4071	1.14366	81.036	1.22597	470.806	288.181	103.585	14.4373	n/a	81.4071	1.14366		mixed analysis?
TUNG-12.1	ESG11	2011-05-04, 22:34	-0.000224757	74.404	2.67279	0.0453847	4.33757	74.0947	2.70492	0.048693	7.87339	0.0906109	8.32508	0.0134962	2.70492	0.324913	---	---	---	---	333.394	0.00944795	3.00341	0.0629699	0.408528	0.404931	7.11872	35.4557	52.8378	83.7325	11254.3	2.88153	15.8356	214.397	86.4205	2.32201	86.3195	2.30657	86.0682	2.315	132.051	185.14	116.308	33.5419	n/a	86.3195	2.30657	6.15979e+13	metamorphic overgrowth, low Ti, Th/U, Yb/Gd, TE ppm, hi Hf/Yb
TUNG-12.1T	ESG11	2012-08-14; 1:42:40 AM	---	---	---	---	---	---	---	---	---	---	---	---	---	---	52.6189	4.86976	4.65916	3.46943	494.687	0.00286053	3.83975	0.116827	0.613449	0.60137	11.0571	54.528	73.3163	106.228	11447.5	---	19.3943	251.369	---	---	---	---	---	---	---	---	---	---	---	86.3195	2.30657		metamorphic overgrowth, low Ti, Th/U, Yb/Gd, TE ppm, hi Hf/Yb
TUNG-24.1	ESG11	2011-05-05, 06:09	-0.000123819	68.5231	1.60056	0.0473138	2.22302	68.366	1.60875	0.0491354	3.37662	0.0990959	3.74027	0.0146272	1.60875	0.430117	---	---	---	---	453.317	0.0163229	5.52582	0.0977107	0.54759	0.264108	8.61451	42.8654	73.6297	119.965	11932.8	11.7066	50.7999	802.175	93.6098	1.49507	93.4656	1.49379	93.4286	1.50005	153.276	79.0889	111.593	16.5497	n/a	93.4656	1.49379	2.49108e+14	appears to be mixed domains in CL, hi Hf/Yb and Th/U consistent with crustal anatexis
TUNG-113	ESG11	2012-01-23, 00:52	9.14343e-05	63.8219	3.47808	0.0483943	2.73849	63.9312	3.48229	0.0470456	4.02609	0.101463	5.32314	0.0156418	3.48229	0.65418	---	---	---	---	1034.42	0.0299218	6.60726	0.0973405	0.564487	0.174384	10.6837	78.5919	202.398	411.307	11012.4	7.48794	57.9542	477.895	100.053	3.45724	100.178	3.47029	100.322	3.52643	50.5055	96.1241	86.2963	8.9597	n/a	100.178	3.47029		migmatite zircon?, Low Ti ppm and Th/U, moderate Hf/Yb and Yb/Gd
TUNG-113T	ESG11	2012-08-14; 2:03:58 AM	---	---	---	---	---	---	---	---	---	---	---	---	---	---	7.82697	4.43868	4.63166	12.7341	1127.3	0.0123802	7.18934	0.134913	0.810907	0.180993	10.9136	87.1887	221.037	459.368	11790.8	---	63.0345	552.594	---	---	---	---	---	---	---	---	---	---	---	100.178	3.47029		migmatite zircon?, Low Ti ppm and Th/U, moderate Hf/Yb and Yb/Gd, age from 113
TUNG-311	ESG11	2014-03-30, 10:32	-0.000758668	61.5958	1.61109	0.047338	2.46324	60.7412	1.7554	0.058369	9.56752	0.132495	9.72722	0.0164633	1.7554	0.180463	---	---	---	---	---	---	---	---	---	---	---	---	---	---	10583	4.67663	11.2589	288.061	105.265	1.83282	103.917	1.67206	103.671	1.67268	542.689	209.158	361.377	126.131	n/a	103.917	1.67206		mixed analysis?
TUNG-352.1	ESG11	2014-03-31, 03:21	-0.000976043	58.7574	4.77645	0.0504316	2.96966	57.7132	4.84967	0.0645121	10.3808	0.154123	11.4578	0.0173271	4.84967	0.423266	---	---	---	---	---	---	---	---	---	---	---	---	---	---	8594.18	3.66948	18.8919	215.609	110.741	5.3247	108.487	5.15676	109.339	5.22692	757.546	218.998	210.899	76.2777	0.856791	108.487	5.15676		mixed analysis
TUNG-5.1	ESG11	2011-05-04, 19:19	0.000286358	53.3627	1.58192	0.0479097	2.72245	53.6473	1.61159	0.0436681	6.38797	0.112232	6.58813	0.0186403	1.61159	0.244621	---	---	---	---	400.494	0.0208855	3.96429	0.0901515	0.503776	0.211549	8.05444	44.0119	56.4825	73.7692	11985.2	7.60047	28.0867	405.582	119.057	1.9011	119.765	1.89295	119.677	1.89871	-130.449	157.89	62.4855	33.8017	n/a	119.765	1.89295		mixed analysis? Metamorphic overgrowth primarily
TUNG-5.1T	ESG11	2012-08-13; 10:01:35 PM	---	---	---	---	---	---	---	---	---	---	---	---	---	---	23.8696	---	4.09638	2.538	234.146	0.00391984	3.7868	0.060034	0.411657	0.297756	7.14329	30.4978	28.6156	32.3866	11998.3	---	8.4515	160.333	---	---	---	---	---	---	---	---	---	---	---	?	?		Metamorphic overgrowth, low Ti, Th/U, Yb/Gd, TE ppm, hi Hf/Yb
TUNG-324	ESG11	2014-03-30, 15:09	-0.000383	51.6569	2.4298	0.049973	2.13298	51.2932	2.48878	0.0555618	7.87404	0.149354	8.258	0.0194958	2.48878	0.301378	---	---	---	---	---	---	---	---	---	---	---	---	---	---	11485.7	5.93604	3.91781	306.638	124.468	3.06803	123.376	2.98325	123.507	2.98128	433.932	175.384	598.039	340.905	n/a	123.376	2.98325		metamorphic overgrowth?, low Th/U
TUNG-16.1	ESG11	2011-05-05, 01:46	0.000513449	49.2166	9.53531	0.0646136	6.55563	49.6888	9.55139	0.0571363	10.6874	0.158546	14.3335	0.0201253	9.55139	0.666368	---	---	---	---	728.071	0.583082	12.8569	1.33916	3.51463	1.99172	28.2173	79.1343	117.745	194.598	8893.32	4.29746	133.64	211.506	128.448	12.1471	127.081	12.0578	128.781	13.6724	495.838	235.515	125.413	14.4704	n/a	127.081	12.0578		mixed analysis
TUNG-332	ESG11	2014-03-30, 18:03	-4.47841e-05	45.7212	1.14932	0.0496141	1.11071	45.6834	1.15923	0.050272	2.62958	0.151729	2.87376	0.0218898	1.15923	0.403386	---	---	---	---	---	---	---	---	---	---	---	---	---	---	10547.2	23.7169	42.8467	1084.36	139.588	1.60076	139.341	1.5929	139.473	1.59669	206.58	60.992	158.11	35.3554	n/a	139.341	1.5929		metamorphic overgrowth?, low Th/U
tung-112.2	ESG11	2013-12-14, 00:26	0.000303061	44.0279	1.98463	0.0475798	2.95229	44.2759	2.00452	0.0430876	6.18333	0.13418	6.50013	0.0225857	2.00452	0.308382	---	3.07231	3.09838	0.888447	232.723	0.00562834	3.51622	0.146881	0.927371	0.484621	15.6409	35.3157	20.4797	16.3197	11696.3	12.8154	16.3592	564.236	143.977	2.85405	145.027	2.8681	144.703	2.85624	-163.632	153.825	-16.1238	-89.2073	n/a	145.027	2.8681		met growth? Low Ti ppm, Th/U, &Yb/Gd, hi Hf/Yb, same Hf ppm as core,
TUNG-111.1	ESG11	2012-01-23, 00:12	-0.000134057	42.5196	2.61533	0.0462975	2.36144	42.4133	2.6213	0.0482718	3.66424	0.156925	4.50532	0.0235775	2.6213	0.581823	---	---	---	---	1549.39	0.394923	66.0219	10.0689	10.4501	5.29493	56.8995	161.222	250.735	432.993	8247.12	11.1802	612.484	475.379	150.226	3.89235	150.378	3.90827	147.918	5.15067	111.582	86.4911	159.323	6.93528	n/a	150.378	3.90827	3.06523e+14	primitive magmatic, low Hf, osc zoned, high Th/U
tung-111.2	ESG11	2013-12-14, 00:00	0.00115781	41.0589	1.62965	0.0498022	3.28622	41.956	1.7475	0.032412	16.651	0.106516	16.7424	0.0238345	1.7475	0.104376	---	13.4718	11.9001	4.51824	1432.97	0.282872	63.789	8.93141	10.0947	5.5625	65.495	135.237	218.454	367.775	8051.48	9.70146	546.328	398.332	151.845	2.62247	155.001	2.52583	152.741	3.44041	-928.712	485.897	148.557	6.21727	n/a	155.001	2.52583		primitive magmatic, low Hf, osc zoned, high Th/U, Ti ppm
TUNG-111T	ESG11	2012-08-14; 1:10:41 AM	---	---	---	---	---	---	---	---	---	---	---	---	---	---	61.1785	21.3492	21.02	5.10585	1611.24	0.0745401	70.5038	9.08067	11.0515	6.61596	69.4586	179.965	261.312	438.973	7969.79	---	704.206	455.019	---	---	---	---	---	---	---	---	---	---	---	153.639	2.12137		primitive magmatic, low Hf, osc zoned, high Th/U, Ti ppm (age from WA of .1 and .2)
TUNG-105.1	ESG11	2012-01-22, 21:37	-8.80852e-05	39.6861	1.52833	0.0508411	4.21686	39.6209	1.53275	0.052132	4.46233	0.181418	4.71824	0.0252392	1.53275	0.324856	---	---	---	---	237.621	0.0148556	0.519528	0.326743	1.10016	0.315846	18.1242	44.6023	18.6116	11.5295	13296.6	18.1818	19.8865	721.567	160.683	2.43243	160.107	2.46557	160.289	2.43216	290.207	101.948	251.361	42.838	n/a	160.107	2.46557	3.83073e+14	metamorphosed evolved crust, low HREE, low th/U&Yb/Gd, hi Hf/Yb, patchy zoning (age from WA .1 and .2, error prop from sqrt of mswd)
tung-105.2	ESG11	2013-12-13, 20:56	0.000392714	41.7151	1.59218	0.048316	2.53973	42.0199	1.61595	0.0424905	5.97605	0.139424	6.19067	0.0237982	1.61595	0.26103	---	5.84271	5.82417	1.45167	232.646	0.0154229	0.361652	0.18091	0.970887	0.214029	14.1357	39.824	17.5746	9.96013	12034.9	16.8103	18.6022	701.243	151.616	2.42146	152.865	2.4261	152.698	2.41461	-198.464	149.69	-110.103	-102.415	n/a	152.865	2.4261		metamorphosed evolved crust, low HREE, low th/U&Yb/Gd, hi Hf/Yb, patchy zoning (age from WA .1 and .2, error prop from sqrt of mswd)
TUNG-105T	ESG11	2012-08-13; 10:33:45 PM	---	---	---	---	---	---	---	---	---	---	---	---	---	---	140.595	---	8.06047	1.5298	427.233	0.00242355	0.449289	0.270959	1.37945	0.375527	20.5035	77.3776	31.8748	19.996	12554.9	---	15.1008	588.748	---	---	---	---	---	---	---	---	---	---	---	156.4	3.6		metamorphosed evolved crust, low HREE, low th/U&Yb/Gd, hi Hf/Yb, patchy zoning (age from WA .1 and .2, error prop from sqrt of mswd)
TUNG-2.2	ESG11	2011-05-04, 17:28	5.31336e-05	40.2708	1.9256	0.0495977	1.14924	40.3103	1.92643	0.0488158	1.491	0.166972	2.43603	0.0248075	1.92643	0.790808	---	---	---	---	1249.7	0.0178937	2.06404	0.0802686	0.635331	0.0638902	12.4767	104.832	248.386	487.805	15314.3	37.821	69.1921	1523.08	157.968	3.00616	158.05	3.02094	158.089	3.0296	137.969	35.022	141.005	13.7491	n/a	158.05	3.02094	8.0137e+14	wet crustal melt? Low Ti, Th/U, hi Hf, Hf/Yb, U
TUNG-2.2T	ESG11	2012-08-13; 7:54:29 PM	---	---	---	---	---	---	---	---	---	---	---	---	---	---	122.094	4.94991	5.03284	19.5227	1217.54	0.00918424	2.75992	0.152382	0.633357	0.0975902	13.5259	102.643	234.508	471.308	15378.6	---	62.7826	1406.71	---	---	---	---	---	---	---	---	---	---	---	158.05	3.02094		wet crustal melt? Low Ti, Th/U, hi Hf, Hf/Yb, U, age from 2.2
TUNG-340	ESG11	2014-03-30, 21:24	0.000188412	38.9799	6.96126	0.0680114	4.2419	39.1159	6.97841	0.0652959	7.33757	0.230162	10.1261	0.025565	6.97841	0.68915	---	---	---	---	---	---	---	---	---	---	---	---	---	---	10710.6	8.44958	12.7954	329.363	162.732	11.2139	159.498	11.0283	162.559	11.2957	782.97	154.164	191.063	131.157	0.796291	159.498	11.0283		mixed analysis
Pre-Mesozoic domains
TUNG-1.1	ESG11	2011-05-04, 16:06	2.97778e-05	3.8285	3.76415	0.170947	3.77788	3.83037	3.76422	0.170571	3.78967	6.13996	5.34144	0.261071	3.76422	0.704721		---	---	---	1013.53	162.805	189.019	35.7606	12.266	2.97776	47.057	121.01	171.889	274.537	9632.98	89.4365	240.023	342.408	1495.32	50.2358	1363.53	50.7022	1445.78	64.0495	2562.52	63.3988	1989.67	309.809	0.467895	2562.52	63.3988	4.37543e+15
TUNG-10	ESG11	2011-05-04, 21:24	1.5878e-05	5.50331	2.38032	0.0805641	0.621416	5.50479	2.3804	0.0803396	0.653894	2.01229	2.46858	0.18166	2.3804	0.964279		---	---	---	1767.55	0.0254494	18.3252	0.949394	3.30781	0.0647247	36.8529	175.001	321.84	497.206	11533.1	83.5123	168.999	459.594	1076.04	23.5904	1069.83	24.549	1075.29	24.8829	1204.48	12.8822	1090.29	27.3338	0.111792	1204.48	12.8822
TUNG-101.1	ESG11	2012-01-22, 17:25	1.70418e-05	2.38461	3.84888	0.158534	0.79428	2.38537	3.84902	0.158318	0.807227	9.15118	3.93275	0.419222	3.84902	0.978708		---	---	---	1539.06	0.0352996	12.5981	2.11859	4.57241	1.41478	41.4614	153.377	262.994	420.042	9798.98	48.7805	71.1078	116.322	2256.95	73.2929	2201.19	91.2263	2245.77	79.9425	2437.04	13.6743	2390.61	92.7223	0.0967794	2437.04	13.6743	1.36763e+15
TUNG-101.2	ESG11	2012-01-22, 18:00	3.99811e-14	4.36748	5.82796	0.100199	0.585597	4.36748	5.82796	0.100199	0.585597	3.16327	5.8573	0.228965	5.82796	0.99499		---	---	---	594.981	0.00499857	13.725	0.310912	1.13665	0.190381	13.5824	56.9892	108.525	191.808	12337.7	100.451	54.3793	438.718	1329.07	69.9945	1303.97	73.8605	1326.67	71.2568	1626.98	10.8887	1465.81	72.0626	0.19853	1626.98	10.8887
TUNG-102.1	ESG11	2012-01-22, 18:56	1.26764e-05	5.65314	3.88707	0.098846	2.34387	5.65448	3.88711	0.0986713	2.35192	2.40602	4.54325	0.176851	3.88711	0.855578		---	---	---	460.382	0.0256945	2.72981	0.273137	1.59825	0.241984	21.3793	63.4298	55.7336	64.3901	11519.7	130.746	35.1766	739.127	1049.75	37.6557	1017.25	38.4104	1050.67	37.9167	1598.35	43.8945	914.869	28.1087	0.363565	1598.35	43.8945	4592146957686130
TUNG-104.1	ESG11	2012-01-22, 20:38	3.80869e-06	3.79965	4.64332	0.105237	0.283968	3.79992	4.64333	0.105185	0.286275	3.81665	4.65214	0.263164	4.64333	0.998105		---	---	---	711.123	0.0247057	3.58392	0.119008	0.462774	0.12641	8.63176	62.7467	104.969	146.544	13800.3	445.867	39.0395	1694.14	1506.01	62.3611	1483.63	67.4334	1506.42	62.5577	1716.76	5.26246	1373.73	29.7537	0.135792	1716.76	5.26246	1.14165e+16
TUNG-106	ESG11	2012-01-22, 21:56	1.96337e-05	5.10206	4.06235	0.0774537	1.0258	5.10394	4.06251	0.0771752	1.09134	2.08484	4.20655	0.195927	4.06251	0.96576		---	---	---	949.658	0.0307935	11.1797	1.98042	3.65865	0.344962	29.5734	109.715	177.198	267.444	6239.95	39.111	32.9303	199.547	1153.4	42.9045	1155.05	45.4806	1151.42	43.979	1124.85	21.7519	1236.24	60.0774	-0.0268464	1124.85	21.7519	8.46356e+14
TUNG-107.1	ESG11	2012-01-22, 22:16	-1.2252e-05	2.72112	4.95675	0.155414	2.08027	2.72049	4.9568	0.15557	2.08012	7.88461	5.37557	0.36758	4.9568	0.922097		---	---	---	1300.65	0.0426926	17.3574	1.66998	3.87021	0.988345	34.3055	133.16	231.924	378.975	10148.5	62.1061	83.3476	168.998	2018	85.8853	1926.89	97.9179	1992.94	92.268	2407.33	35.344	2383.08	87.6334	0.199576	2407.33	35.344	1915171862735688
tung-107.2	ESG11	2013-12-13, 21:22	0.000289649	15.052	4.14532	0.0913084	2.21724	15.1313	4.14836	0.087248	2.72603	0.795026	4.96388	0.0660883	4.14836	0.835708		7.30634	7.03648	5.77103	424.695	0.0136688	6.56324	0.176702	0.764453	0.474525	10.7571	45.0598	60.2623	87.0317	10993.3	33.9984	46.9274	511.744	412.546	16.5778	396.391	16.156	417.807	16.8738	1365.14	52.4964	32.9125	46.9445	0.709634	1365.14	52.4964		mixed ages
TUNG-109	ESG11	2012-01-22, 23:14	9.08519e-06	4.15645	4.33248	0.102149	0.581068	4.15716	4.3325	0.102024	0.58614	3.38382	4.37197	0.240549	4.3325	0.990972		---	---	---	1295.69	0.0278659	7.21208	0.178206	1.22369	0.112764	20.7841	127.033	215.211	397.854	12379.5	263.302	36.9844	1094.4	1389.55	54.1559	1364.8	57.5856	1390.94	54.4069	1660.46	10.852	1089.76	47.762	0.178061	1660.46	10.852	7098245372150324
TUNG-11.2	ESG11	2011-05-04, 22:17	1.29321e-05	2.74321	2.15916	0.158023	1.19443	2.74375	2.15919	0.157857	1.19746	7.93269	2.46901	0.364464	2.15919	0.874517		---	---	---	1611.38	0.10114	25.57	1.33235	3.53336	0.429039	34.9088	155.786	296.855	496.185	10513.1	147.073	243.417	403.451	2003.3	37.1794	1924.39	41.2734	1991.43	40.264	2432.1	20.295	2159.02	49.6304	0.208752	2432.1	20.295	4724117331444669
TUNG-110	ESG11	2012-01-22, 23:34	-8.29481e-05	15.3497	10.7824	0.0632673	7.43664	15.3259	10.783	0.0644638	7.40419	0.57995	13.0803	0.065249	10.783	0.824368		---	---	---	648.906	0.0803539	12.1011	1.25317	2.48359	0.749829	17.6435	64.7604	114.441	197.814	11001.4	13.3079	24.0039	204.271	407.469	42.5776	402.574	42.6685	402.474	43.3354	755.964	156.242	678.635	68.028	0.467469	755.964	156.242
TUNG-112.1	ESG11	2012-01-23, 00:33	-4.02106e-06	4.5014	5.35791	0.0977025	1.10338	4.50106	5.35791	0.097758	1.10413	2.9946	5.4705	0.22217	5.35791	0.97942		---	---	---	535.557	0.0307629	2.54236	0.122358	0.876318	0.208017	14.1216	62.2691	85.0283	186.604	11556.8	177.665	22.043	799.74	1293.33	62.7867	1270.45	66.1177	1293.2	63.0254	1580.97	20.6534	1326.73	65.413	0.196414	1580.97	20.6534	4883929506508083
TUNG-114	ESG11	2012-01-23, 01:30	-5.25559e-14	3.27772	3.75441	0.143649	2.5238	3.27772	3.75441	0.143649	2.5238	6.04271	4.52384	0.30509	3.75441	0.829915		---	---	---	1414.3	0.0548896	10.5835	2.24007	4.60098	1.56493	39.3561	141.865	246.484	407.409	9188.74	68.8588	114.641	225.7	1716.5	56.5779	1626.84	60.9203	1680.69	61.3251	2270.91	43.4998	2202.93	79.7155	0.283618	2270.91	43.4998	2373201600792276
TUNG-115	ESG11	2012-01-23, 02:11	-4.12724e-22	5.5194	4.43657	0.0759026	1.28165	5.5194	4.43657	0.0759026	1.28165	1.89612	4.61798	0.181179	4.43657	0.960716		---	---	---	1381.31	0.0635775	13.891	2.81727	4.95493	0.419381	41.4341	143.367	236.312	366.221	8681.7	23.7671	62.8812	131.18	1073.41	43.869	1072.47	46.0932	1073.23	47.0964	1091.63	25.6713	1075.92	13.6529	0.0175486	1091.63	25.6713	5.7364e+14
TUNG-116	ESG11	2012-01-23, 02:53	2.55666e-06	4.84695	7.0316	0.109101	4.78053	4.84718	7.0316	0.109066	4.78238	3.10244	8.5038	0.206305	7.0316	0.826877		---	---	---	515.232	0.034199	1.73415	0.125236	0.267655	0.0934436	3.28047	25.832	116.571	419.046	11684.5	245.822	13.4161	1191.49	1209.1	77.5221	1164.79	79.7824	1208.45	77.6567	1783.09	87.1884	1618.87	121.087	0.346759	1783.09	87.1884	8390583454212349
TUNG-117.1	ESG11	2012-01-23, 03:33	5.98301e-06	4.89403	2.34882	0.108824	4.01928	4.89458	2.34884	0.108743	4.02344	3.06328	4.65887	0.204308	2.34884	0.504165		---	---	---	930.031	0.0573261	5.648	0.219888	0.752276	0.301729	11.6924	68.8051	175.471	377.254	11626.5	141.746	45.6374	693.709	1198.42	25.6873	1154.35	27.1201	1195.56	25.9544	1777.67	73.4011	1502.67	86.8822	0.350637	1777.67	73.4011	4921064294844284
TUNG-118	ESG11	2012-01-23, 04:52	0.000183081	10.4543	4.83953	0.0908846	3.77563	10.4902	4.84562	0.0883254	4.40727	1.16092	6.55012	0.0953268	4.84562	0.739776		---	---	---	146.392	0.0375269	1.58683	0.103669	0.161949	0.265967	1.91377	9.95096	26.9924	66.3306	8582.9	8.50246	14.6845	88.8874	586.964	27.1856	565.738	26.8375	582.627	27.96	1388.74	84.5962	756.87	57.0363	0.592624	1388.74	84.5962
TUNG-119.1	ESG11	2012-01-23, 05:31	0.000114093	6.55567	1.17512	0.0757138	1.74866	6.56968	1.18481	0.0740886	2.37138	1.55492	2.65089	0.152214	1.18481	0.446948		---	---	---	1341.88	0.153549	44.8742	8.72402	10.9485	3.49219	59.3888	155.382	218.285	325.974	9172.61	12.8838	86.4708	84.4617	913.364	10.09	908.089	10.4513	899.553	11.9614	1043	47.8459	992.41	13.912	0.129351	1043	47.8459	3.89054e+14
TUNG-12.2	ESG11	2011-05-04, 22:54	2.14667e-05	3.263	4.49015	0.165914	3.57535	3.26411	4.49028	0.165641	3.58626	6.99689	5.74664	0.306362	4.49028	0.781375		---	---	---	836.52	0.042684	10.1796	0.546102	1.50102	0.479297	16.0554	78.6995	155.971	284.532	9592.19	28.3192	43.9252	92.4054	1722.78	67.8832	1605.14	70.8617	1719.76	72.3973	2513.35	60.2872	1771.21	93.8446	0.361353	2513.35	60.2872	1.10691e+15
TUNG-120	ESG11	2012-01-23, 05:50	-0.000105483	5.65935	2.49929	0.0744091	1.70252	5.6482	2.50316	0.075908	2.17173	1.85301	3.31395	0.177047	2.50316	0.755342		---	---	---	1235.26	0.0331184	9.60368	1.8458	4.22505	0.420935	38.2701	133.252	213.238	314.067	7319.34	16.2984	65.1132	92.2383	1050.82	24.2719	1048.78	25.4362	1057.07	27.1988	1091.77	43.4986	995.038	40.7707	0.039382	1091.77	43.4986	4.21472e+14
TUNG-121	ESG11	2012-01-23, 06:09	-5.15838e-05	5.19342	6.98639	0.0794429	1.64655	5.18842	6.98705	0.0801718	1.86601	2.13053	7.23194	0.192737	6.98705	0.966139		---	---	---	845.088	0.0241667	12.2028	0.791042	2.17337	0.413241	20.807	81.504	146.178	254.619	11262.2	15.304	47.786	79.4801	1136.18	72.7834	1132.47	76.6677	1133.79	79.7608	1200.36	36.7837	1161.89	70.9566	0.0565547	1200.36	36.7837	3.95771e+14
TUNG-122.1	ESG11	2012-01-23, 07:08	7.31986e-23	4.01452	4.91086	0.103743	0.82459	4.01452	4.91086	0.103743	0.82459	3.56308	4.97961	0.249096	4.91086	0.986194		---	---	---	2417.93	0.0579484	15.1876	0.936345	3.76645	0.486094	53.663	240.282	384.075	578.906	12860.1	490.927	248.416	1970.84	1433.81	63.1315	1408.81	67.5004	1433.95	64.2471	1691.33	15.2068	1426	51.8488	0.167041	1691.33	15.2068	1.33182e+16
TUNG-123.1	ESG11	2012-01-23, 07:29	3.55544e-05	5.01902	4.22448	0.14609	3.95589	5.02236	4.22501	0.145631	3.9835	3.99804	5.8068	0.199109	4.22501	0.727596		---	---	---	764.813	0.0268562	10.1591	0.831352	1.65195	0.537831	16.876	70.5182	136.639	244.059	9138.12	21.4385	49.0739	107.6	1170.53	45.225	1070.51	44.6442	1166.82	48.533	2294.5	68.4865	1224.44	54.8566	0.533444	2294.5	68.4865	1.13643e+15
TUNG-13.1	ESG11	2011-05-04, 23:33	1e-32	4.09543	3.53358	0.0900293	1.16194	4.09543	3.53358	0.0900293	1.16194	3.031	3.71971	0.244175	3.53358	0.94996		---	---	---	483.319	0.0123303	22.5238	0.475666	0.972449	0.360921	8.84387	42.6489	92.9082	195.141	10324	20.0512	43.1318	82.1181	1408.36	44.7046	1407.1	48.0005	1406.52	48.1218	1425.32	22.1914	1433.73	53.4468	0.0127824	1425.32	22.1914	4.90179e+14
TUNG-14.2	ESG11	2012-01-23, 01:52	-1.43395e-05	5.74555	13.3687	0.0818047	8.31211	5.74401	13.3687	0.0820068	8.29306	1.9685	15.732	0.174094	13.3687	0.849775		---	---	---	1205.63	0.0241497	13.8194	1.21575	2.82102	0.47049	28.1926	116.114	210.866	376.212	11654	52.1136	71.8597	299.421	1034.63	127.788	1023.81	132.825	1037.82	132.253	1244.83	162.434	944.748	74.5827	0.177545	1244.83	162.434	1.44638e+15
TUNG-15.1	ESG11	2011-05-05, 00:54	2.80006e-05	5.75514	1.69507	0.07175	1.21568	5.75788	1.69574	0.0713499	1.34566	1.70857	2.16479	0.173675	1.69574	0.783327		---	---	---	1724.48	0.155833	28.435	5.44264	8.50852	2.86476	56.1076	188.641	291.259	476.939	9306.71	26.1089	69.171	150.26	1032.33	16.1759	1035.12	16.9467	1035.18	17.3855	966.565	27.4683	989.874	31.9728	-0.0709225	1035.12	16.9467	6.17113e+14
TUNG-17.1	ESG11	2011-05-05, 02:22	1e-32	8.63614	4.94719	0.0708788	0.772471	8.63614	4.94719	0.0708788	0.772471	1.13161	5.00713	0.115793	4.94719	0.988028		---	---	---	721.1	0.0396097	8.16494	0.720989	1.69219	0.496097	14.4878	69.3271	131.789	293.587	11304.5	62.2127	83.8801	537.277	706.301	33.0958	699.703	33.6053	698.901	33.9463	953.029	15.801	1025.24	78.3326	0.265812	953.029	15.801	1.89181e+15
TUNG-18	ESG11	2011-05-05, 03:15	8.25955e-06	2.43357	1.64481	0.154927	0.464973	2.43387	1.64485	0.154822	0.470337	8.77074	1.71078	0.410869	1.64485	0.961465		---	---	---	1607.28	0.0886626	18.2089	2.14186	4.37474	1.21655	41.33	165.517	292.078	480.281	9395.45	82.7009	130.674	201.258	2218.89	30.8789	2179.38	36.4116	2215.16	33.5302	2399.13	7.99839	2266.46	47.5425	0.0915988	2399.13	7.99839	2.33199e+15
TUNG-19.2	ESG11	2012-01-23, 03:12	-8.98079e-23	5.9889	4.7845	0.0789497	0.591496	5.9889	4.7845	0.0789497	0.591496	1.81763	4.82092	0.166976	4.7845	0.992445		---	---	---	2181.01	1.48139	27.5353	4.32425	7.05948	0.22899	57.4407	222.851	398.575	664.352	11851.8	105.163	218.312	629.812	995.426	44.1312	987.114	45.7354	983.094	46.6469	1170.01	11.7114	1229.18	60.5759	0.156321	1170.01	11.7114	2.89847e+15
TUNG-20.2	ESG11	2011-05-05, 04:06	4.74098e-05	5.37171	2.05427	0.0762311	0.782684	5.37601	2.05466	0.0755571	0.907635	1.93783	2.2462	0.186012	2.05466	0.914725		---	---	---	3263.88	0.118006	20.7188	4.27072	8.96658	3.29724	87.5409	338.003	571.158	911.093	8978.71	52.6025	361.357	282.565	1099.73	20.7734	1100.56	21.7955	1100.26	25.7527	1082.49	18.2046	1097.23	26.6305	-0.0166922	1082.49	18.2046	1.41768e+15
tung-201.1	ESG11	2013-12-13, 17:42	5.19807e-05	4.58512	1.74606	0.106575	2.15824	4.58908	1.7463	0.105863	2.18619	3.18067	2.79803	0.217908	1.7463	0.624117		13.0014	12.5777	12.0969	688.539	0.0158269	9.66842	0.462678	2.19869	0.38461	22.0885	85.9532	82.4053	92.786	11950.6	159.565	81.5408	731.625	1270.81	20.1417	1237.86	21.0839	1271.53	20.4617	1728.55	40.1282	1222.56	39.8439	0.283871	1728.55	40.1282	5061557700669577
TUNG-201.2	ESG11	2014-03-31, 02:23	1.28371e-05	2.06437	4.97783	0.163519	0.63843	2.06474	4.97894	0.163358	0.862587	10.9088	5.05311	0.484323	4.97894	0.985322		---	---	---	---	---	---	---	---	---	---	---	---	---	6305.46	20.9473	21.1235	43.2429	2546.07	104.728	2563.23	138.913	2545.46	110.722	2489.98	14.5344	2557.43	171.685	-0.0294154	2489.98	14.5344	5.12576e+14
tung-203.1	ESG11	2013-12-13, 19:36	0.000380825	6.11278	1.76946	0.0744041	2.44072	6.15288	1.77755	0.0689444	3.35644	1.54498	3.79808	0.162525	1.77755	0.468013		12.7126	12.6985	4.34312	599.515	0.0142866	4.3451	0.559837	1.34912	0.0741975	13.3246	60.2739	107.037	190.531	11166.1	33.7328	81.1393	206.201	970.796	16.0198	973.66	16.7481	974.889	17.0481	896.18	69.2652	899.513	38.5191	-0.0864557	973.66	16.7481	7.81015e+14
tung-204	ESG11	2013-12-14, 02:11	5.13143e-05	3.55146	1.93175	0.118636	0.513687	3.55438	1.93189	0.117944	0.54418	4.57523	2.00707	0.281343	1.93189	0.962542		10.8974	11.011	25.6976	705.767	0.0267456	5.02015	0.287186	1.29214	0.324522	10.46	52.4193	140.554	393.311	11164.5	188.301	28.8617	668.743	1598.12	27.3446	1563.38	29.2712	1598.25	27.5689	1924.52	9.75266	1574.36	290.036	0.187651	1924.52	9.75266
tung-206	ESG11	2013-12-14, 03:31	0.000103081	4.18501	1.63489	0.115298	5.06332	4.19212	1.63562	0.1139	5.14643	3.74621	5.40009	0.238543	1.63562	0.302888		9.45129	10.1135	6.80274	651.658	0.0243733	5.8861	0.303028	1.04081	0.0603995	12.3503	55.5213	115.14	217.889	12022.2	94.3615	70.2865	394.904	1379.12	20.3075	1338.4	22.9918	1378.65	20.8368	1861.77	92.9281	1398.88	45.8384	0.281115	1861.77	92.9281
TUNG-22.2	ESG11	2011-05-05, 05:17	-3.59647e-14	4.05913	2.6228	0.10332	0.472628	4.05913	2.6228	0.10332	0.472628	3.50956	2.66504	0.246358	2.6228	0.984149		---	---	---	901.395	0.00889875	16.2476	0.211072	1.09078	0.117869	12.2136	77.8045	177.881	369.679	11308.8	118.035	147.362	479.119	1419.67	33.42	1397.91	35.3776	1415.27	34.8658	1683.8	8.7244	1525.92	41.7002	0.169789	1683.8	8.7244
TUNG-23.2	ESG11	2012-01-23, 04:11	1.16442e-05	3.42993	5.24159	0.124189	0.65329	3.43068	5.24164	0.124034	0.66608	4.98497	5.28379	0.291488	5.24164	0.992022		---	---	---	205.364	0.0341293	0.223121	0.0166559	0.0436446	0.0174668	0.345077	7.97216	48.1104	173.101	12570.2	73.8894	1.17426	253.436	1648.96	76.2632	1598.74	82.6285	1649.37	76.3217	2014.28	11.8126	971.319	534.717	0.206299	2014.28	11.8126	2.07663e+15
TUNG-24.2	ESG11	2012-01-23, 04:32	0.000169162	2.77278	5.56165	0.157223	0.740928	2.78158	5.56256	0.15507	0.872925	7.68666	5.63064	0.359508	5.56256	0.98791		---	---	---	1508.07	0.0736861	14.2184	2.18745	4.60982	1.24657	40.604	152.203	258.173	412.586	9740	42.8717	75.2551	118.874	1979.84	94.8243	1885.25	106.433	1970.36	104.112	2401.86	14.8405	2085.72	94.2204	0.215088	2401.86	14.8405	1.3757e+15
TUNG-25.1	ESG11	2011-05-05, 06:26	-4.03046e-05	4.85761	2.04952	0.0807464	0.704775	4.85434	2.0498	0.0813151	0.781831	2.30963	2.19384	0.206001	2.0498	0.934343		---	---	---	2508.57	0.0619437	54.8005	4.30483	9.00652	1.36991	79.2099	282.355	433.002	610.151	6901.31	66.6761	313.814	323.886	1207.48	22.571	1206.31	23.8253	1203.52	26.191	1228.22	15.35	1234.21	25.9763	0.0178396	1228.22	15.35	1771194089092223
TUNG-26.2	ESG11	2012-01-23, 06:48	4.87233e-06	2.8474	3.52254	0.127677	5.4253	2.84766	3.52255	0.127612	5.42877	6.17883	6.47147	0.351166	3.52255	0.54432		---	---	---	439.349	0.0213245	0.404544	0.0402147	0.0652336	0.0220769	0.757911	17.302	94.0016	328.259	12401.9	161.786	1.48941	460.668	1940.16	59.0173	1916.31	71.3867	1940.4	59.0452	2064.57	95.7234	1361.46	425.603	0.071813	2064.57	95.7234	3894946284965599
TUNG-27.2	ESG11	2011-05-05, 08:10	0.000165383	8.87071	1.84862	0.0723831	2.13162	8.89663	1.86014	0.0700134	3.26299	1.08507	3.75596	0.112402	1.86014	0.49525		---	---	---	755.736	0.0424323	23.4122	0.575832	1.70593	0.643919	15.3858	73.2862	146.043	272.268	9610.09	8.18595	34.039	72.6152	686.683	12.1165	680.491	12.2829	672.886	13.1245	927.851	67.0053	875.511	32.0773	0.266594	927.851	67.0053	2.64878e+14
TUNG-28.2	ESG11	2011-05-05, 09:02	1e-32	4.58136	1.73773	0.0855974	1.0029	4.58136	1.73773	0.0855974	1.0029	2.57613	2.00637	0.218276	1.73773	0.866109		---	---	---	1280.46	0.0652384	16.0805	1.24021	3.24209	0.269463	31.3772	124.749	237.864	400.622	8258.21	32.4072	58.9492	148.469	1272.76	20.0707	1269.28	21.2841	1273.92	21.2307	1328.27	19.4127	1251.8	27.8806	0.0444108	1328.27	19.4127	7.97081e+14
TUNG-3.1	ESG11	2011-05-04, 17:46	7.77188e-06	9.27855	5.08035	0.0814588	2.51293	9.27982	5.08037	0.081349	2.52029	1.20869	5.67115	0.107761	5.08037	0.895826		---	---	---	450.667	0.0314653	5.04943	0.254557	0.811903	0.539694	7.36063	35.5878	92.3121	208.232	14030.1	79.7701	44.5618	740.151	659.73	31.8587	644.267	31.8668	660.115	32.1437	1229.03	49.4761	615.967	39.492	0.475794	1229.03	49.4761
TUNG-300	ESG11	2014-03-29, 11:46	-0.000146508	5.29817	1.45901	0.0767826	1.01417	5.28511	1.46853	0.078857	2.03218	2.05725	2.50726	0.189211	1.46853	0.585713		---	---	---	---	---	---	---	---	---	---	---	---	---	6535.08	24.0572	59.9014	127.459	1117.1	15.0622	1114.56	15.6977	1112.83	16.0566	1167.68	40.2502	1179.99	38.7859	0.0454916	1167.68	40.2502
TUNG-301.3	ESG11	2014-03-31, 02:01	8.37648e-05	4.95903	9.17099	0.131827	8.02126	4.96604	9.17484	0.130714	8.25788	3.62921	12.3438	0.201368	9.17484	0.743273		---	---	---	---	---	---	---	---	---	---	---	---	---	6430.71	10.7249	24.9386	53.1849	1182.66	99.1358	1112.96	99.3844	1176.17	106.395	2106.81	144.914	1279.03	138.862	0.471735	2106.81	144.914	5.03984e+14
TUNG-303	ESG11	2014-03-29, 12:26	1.8465e-05	3.02673	1.861	0.153447	0.388319	3.02761	1.86103	0.153208	0.393918	6.97725	1.90226	0.330294	1.86103	0.978324		---	---	---	---	---	---	---	---	---	---	---	---	---	8310.16	348.741	740.571	1055.55	1839.81	29.7869	1754.98	31.9226	1830.24	32.9381	2381.31	6.71116	1943.17	51.0319	0.263017	2381.31	6.71116
TUNG-304	ESG11	2014-03-30, 06:00	8.79054e-06	4.74927	1.28032	0.101022	0.547868	4.74996	1.28047	0.100901	0.572018	2.92891	1.40243	0.210528	1.28047	0.913037		---	---	---	---	---	---	---	---	---	---	---	---	---	10575.4	212.629	91.4242	1009.83	1231.63	14.3557	1204.31	14.8712	1230.03	14.5379	1639.94	10.6184	1362.83	31.4688	0.265639	1639.94	10.6184
TUNG-305	ESG11	2014-03-30, 06:19	-1.62666e-05	6.5996	1.70198	0.0780729	1.29986	6.59775	1.70222	0.0783036	1.33051	1.63639	2.16051	0.151567	1.70222	0.787879		---	---	---	---	---	---	---	---	---	---	---	---	---	10280.5	118.08	332.172	779.278	909.74	14.4427	900.325	14.8414	907.535	15.397	1153.72	26.4066	944.534	18.2546	0.219635	1153.72	26.4066
TUNG-306	ESG11	2014-03-30, 06:36	-1.12073e-05	2.4336	1.1187	0.155261	0.496305	2.43319	1.11882	0.155404	0.503823	8.80617	1.22703	0.410982	1.11882	0.911813		---	---	---	---	---	---	---	---	---	---	---	---	---	8711.34	216.393	475.683	526.613	2219.41	21.0077	2178.5	24.7987	2203.72	23.8517	2405.52	8.56222	2358.34	39.7287	0.0943767	2405.52	8.56222
TUNG-308	ESG11	2014-03-30, 07:30	-3.28692e-05	4.42857	1.43078	0.0845621	0.819361	4.42617	1.43421	0.0850236	1.28338	2.64858	1.92458	0.225929	1.43421	0.745205		---	---	---	---	---	---	---	---	---	---	---	---	---	9058.82	32.4419	55.9389	143.671	1313.13	17.0387	1312.99	18.1321	1311.82	17.9779	1315.23	24.8873	1337.49	38.1614	0.00170436	1315.23	24.8873
TUNG-309	ESG11	2014-03-30, 07:47	6.09029e-06	3.3397	1.18366	0.109399	0.363577	3.34002	1.184	0.109316	0.425526	4.51269	1.25814	0.299399	1.184	0.941068		---	---	---	---	---	---	---	---	---	---	---	---	---	12254.8	133.837	91.7189	446.976	1688.33	17.5864	1677.44	19.3311	1688.67	18.0659	1787.25	7.75385	1675.24	42.4988	0.0614436	1787.25	7.75385
TUNG-312	ESG11	2014-03-30, 10:51	-3.05257e-05	5.65869	1.63614	0.0752526	1.02236	5.65575	1.64939	0.0756866	2.52145	1.84514	3.01301	0.176811	1.64939	0.547424		---	---	---	---	---	---	---	---	---	---	---	---	---	8574.58	17.5409	54.3206	99.2584	1049.53	15.9751	1047.89	16.5522	1047.89	17.2596	1085.92	50.5474	1069.88	38.1771	0.0350191	1085.92	50.5474
TUNG-314	ESG11	2014-03-30, 11:10	9.10248e-05	22.5256	1.3745	0.0796272	1.50544	22.5632	1.37722	0.0783368	1.75555	0.478704	2.2313	0.04432	1.37722	0.617227		---	---	---	---	---	---	---	---	---	---	---	---	---	10184.1	44.6967	36.4245	1006.82	279.555	3.76779	270.455	3.69103	278.751	3.79561	1154.57	34.8381	423.089	55.2364	0.765751	1154.57	34.8381
TUNG-315	ESG11	2014-03-30, 11:29	-4.11897e-05	3.3736	3.3155	0.142295	2.12511	3.37138	3.31661	0.142834	2.17221	5.84149	3.96464	0.296614	3.31661	0.836546		---	---	---	---	---	---	---	---	---	---	---	---	---	8823.28	34.382	40.1109	115.991	1674.5	48.9095	1598.67	51.716	1660.78	51.2598	2261.09	37.4792	1978.55	77.4677	0.292968	2261.09	37.4792
TUNG-316	ESG11	2014-03-30, 12:09	1.71226e-05	3.07956	2.09673	0.148069	2.48759	3.08039	2.09724	0.147846	2.50557	6.61768	3.26746	0.324634	2.09724	0.641857		---	---	---	---	---	---	---	---	---	---	---	---	---	8760.81	63.3229	111.547	195.007	1812.32	33.1333	1736.4	36.3143	1798.46	35.918	2320.42	42.9592	1997.95	56.2973	0.251686	2320.42	42.9592
TUNG-318	ESG11	2014-03-30, 12:50	-1.60599e-06	2.58062	2.64925	0.17701	1.38478	2.58056	2.64954	0.17703	1.39658	9.45879	2.99507	0.387513	2.64954	0.884631		---	---	---	---	---	---	---	---	---	---	---	---	---	8449.76	74.0039	92.4193	190.976	2111.29	47.7021	1999.72	53.013	2108.48	50.7232	2624.52	23.2242	2158.81	76.9242	0.238061	2624.52	23.2242
TUNG-319	ESG11	2014-03-30, 13:12	3.93101e-06	3.73488	5.47222	0.102261	6.15588	3.73512	5.47225	0.102207	6.16159	3.77292	8.2408	0.267729	5.47225	0.664044		---	---	---	---	---	---	---	---	---	---	---	---	---	10341.7	178.444	69.6615	666.468	1529.26	74.4995	1517.03	81.0196	1529.89	75.5041	1663.78	114.029	1482.28	96.0126	0.0882025	1663.78	114.029
TUNG-320	ESG11	2014-03-30, 13:50	-5.97639e-06	7.05961	4.18939	0.0742146	3.55576	7.05887	4.19339	0.0742998	4.08894	1.45129	5.85696	0.141666	4.19339	0.715968		---	---	---	---	---	---	---	---	---	---	---	---	---	9501.99	19.5538	48.5532	138.042	854.074	33.5436	847.354	34.4302	852.253	35.3391	1048.74	82.4286	888.982	52.9017	0.192031	1048.74	82.4286
TUNG-321	ESG11	2014-03-30, 14:10	-1.39414e-05	4.46914	1.29018	0.102623	0.571649	4.46811	1.29029	0.102814	0.586678	3.17272	1.41741	0.223808	1.29029	0.910318		---	---	---	---	---	---	---	---	---	---	---	---	---	10640.7	207.594	170.984	927.765	1301.97	15.2114	1274.78	15.8681	1299.75	15.6226	1674.74	10.8422	1391.24	42.0942	0.238819	1674.74	10.8422
TUNG-323	ESG11	2014-03-30, 14:50	3.1409e-06	19.6968	3.09504	0.090674	1.25108	19.6979	3.09522	0.0906302	1.28361	0.634386	3.35083	0.0507668	3.09522	0.923718		---	---	---	---	---	---	---	---	---	---	---	---	---	11752.1	103.481	124.279	2038.25	319.227	9.64013	304.413	9.29241	318.991	9.7319	1438.01	24.4729	344.357	18.0192	0.78831	1438.01	24.4729
TUNG-325	ESG11	2014-03-30, 15:28	-3.51615e-05	4.59511	6.0371	0.151444	0.893585	4.5924	6.0377	0.151899	0.989347	4.56053	6.11822	0.217751	6.0377	0.986839		---	---	---	---	---	---	---	---	---	---	---	---	---	8789.61	49.8105	122.154	228.885	1269.98	69.5972	1169.57	68.0369	1251.52	75.4352	2366.67	16.881	1510.63	97.4227	0.505816	2366.67	16.881
TUNG-326	ESG11	2014-03-30, 15:47	7.33622e-05	4.30703	3.19999	0.118379	3.34772	4.31226	3.20249	0.117388	3.49292	3.75336	4.73882	0.231897	3.20249	0.675799		---	---	---	---	---	---	---	---	---	---	---	---	---	8827.05	27.2769	50.103	117.482	1344.43	38.8622	1296.92	40.4449	1348.87	41.3093	1916.05	62.6622	1269.14	67.7109	0.323128	1916.05	62.6622
TUNG-327	ESG11	2014-03-30, 16:07	-3.76862e-05	7.57296	1.51591	0.100449	1.68917	7.56797	1.51653	0.100968	1.71357	1.83953	2.28827	0.132136	1.51653	0.662741		---	---	---	---	---	---	---	---	---	---	---	---	---	11066.3	70.6321	86.7409	534.894	800.038	11.4102	766.977	11.378	801.643	11.6841	1641.18	31.8041	731.91	33.2473	0.532667	1641.18	31.8041
TUNG-328	ESG11	2014-03-30, 16:26	-9.26422e-05	8.69797	3.3665	0.155595	2.17289	8.68372	3.37255	0.15678	2.34523	2.48935	4.10782	0.115158	3.37255	0.821007		---	---	---	---	---	---	---	---	---	---	---	---	---	9215.75	19.7973	26.4728	172.197	702.634	22.451	623.917	20.633	678.149	23.0631	2420.49	39.795	1749.92	105.143	0.742235	2420.49	39.795
TUNG-329.1	ESG11	2014-03-30, 17:05	1.19432e-05	3.77405	1.47475	0.147039	0.613649	3.77478	1.47486	0.146884	0.622506	5.36517	1.60085	0.264916	1.47486	0.921297		---	---	---	---	---	---	---	---	---	---	---	---	---	9788.26	166.938	422.428	630.033	1514.94	19.912	1424.58	20.3355	1483.31	22.3127	2309.21	10.6858	1850.32	45.5239	0.38309	2309.21	10.6858
TUNG-330	ESG11	2014-03-30, 17:24	-5.28652e-05	5.09712	1.20473	0.0784842	0.514167	5.09259	1.20556	0.0792322	0.695285	2.14518	1.39169	0.196364	1.20556	0.866257		---	---	---	---	---	---	---	---	---	---	---	---	---	9284.62	68.2408	167.458	347.831	1155.76	12.7557	1154.64	13.4092	1152.37	13.6905	1177.08	13.7522	1204.67	21.0555	0.019069	1177.08	13.7522
TUNG-331	ESG11	2014-03-30, 17:44	4.59459e-06	3.63552	2.117	0.130368	0.588871	3.63579	2.11704	0.130307	0.595732	4.94164	2.19927	0.275044	2.11704	0.962614		---	---	---	---	---	---	---	---	---	---	---	---	---	11474.6	236.896	83.5893	861.24	1566.35	29.4391	1507.35	30.8854	1561.29	29.8445	2101.34	10.4607	1971.5	78.2497	0.28267	2101.34	10.4607
TUNG-333	ESG11	2014-03-30, 18:41	1.55754e-06	2.93202	1.63872	0.166673	0.4782	2.93209	1.63878	0.166653	0.483873	7.83679	1.70873	0.341054	1.63878	0.959068		---	---	---	---	---	---	---	---	---	---	---	---	---	8590.31	201.703	391.379	591.397	1891.74	26.8668	1782.36	28.6226	1887.27	29.3249	2523.58	8.12596	1943.75	32.2638	0.293718	2523.58	8.12596
TUNG-334	ESG11	2014-03-30, 19:00	-7.34201e-06	3.81006	1.31702	0.10021	0.956921	3.80961	1.33647	0.100311	2.15322	3.63052	2.53427	0.262494	1.33647	0.52736		---	---	---	---	---	---	---	---	---	---	---	---	---	7642.07	18.2807	77.8615	69.6506	1502.59	17.913	1491.51	19.0553	1485.53	21.2625	1629.05	40.0266	1605.33	37.5792	0.0844273	1629.05	40.0266
TUNG-336	ESG11	2014-03-30, 19:41	1.36723e-05	5.40784	1.15836	0.108789	1.10272	5.40909	1.15878	0.108602	1.12895	2.76832	1.61781	0.184874	1.15878	0.716265		---	---	---	---	---	---	---	---	---	---	---	---	---	9523.3	121.084	70.1991	654.8	1093.55	11.6553	1052.44	11.8475	1089.77	11.8676	1775.31	20.6019	1347.17	63.421	0.407179	1775.31	20.6019
TUNG-337	ESG11	2014-03-30, 20:23	2.29545e-05	2.81287	2.45255	0.163782	3.70996	2.81387	2.45472	0.16349	3.75417	8.01103	4.48547	0.355383	2.45472	0.547261		---	---	---	---	---	---	---	---	---	---	---	---	---	8535.15	34.7958	50.0713	97.8762	1960.25	41.4911	1863.93	46.9417	1954.36	44.6754	2491.34	63.2482	2051.76	106.945	0.251838	2491.34	63.2482
TUNG-338	ESG11	2014-03-30, 20:42	-7.82922e-06	3.23912	1.61721	0.144081	0.23728	3.23872	1.61725	0.144183	0.245782	6.13822	1.63582	0.308764	1.61725	0.988648		---	---	---	---	---	---	---	---	---	---	---	---	---	9228.29	218.086	365.686	706.406	1734.62	24.5957	1660.14	26.1077	1715.53	26.5437	2277.3	4.23335	2014.19	47.9753	0.271008	2277.3	4.23335
TUNG-339	ESG11	2014-03-30, 21:04	-2.38025e-05	5.11441	3.82673	0.1443	3.32009	5.11234	3.82965	0.14461	3.40591	3.90014	5.12508	0.195605	3.82965	0.747237		---	---	---	---	---	---	---	---	---	---	---	---	---	8569.18	22.8647	55.573	116.939	1151.67	40.3896	1063.39	39.7337	1147.2	43.6022	2282.39	58.6317	1216.69	95.7278	0.534092	2282.39	58.6317
TUNG-341	ESG11	2014-03-30, 22:02	-2.82735e-05	4.16787	1.60709	0.104701	0.415888	4.16594	1.60748	0.105088	0.501013	3.4781	1.68375	0.240042	1.60748	0.954704		---	---	---	---	---	---	---	---	---	---	---	---	---	10263.2	83.6782	91.7648	348.76	1386.91	20.0592	1360.45	21.0907	1386.01	20.7998	1715.06	9.21187	1412.55	41.1081	0.20676	1715.06	9.21187
TUNG-342	ESG11	2014-03-30, 22:21	0.000105573	13.0228	1.62426	0.11214	0.647123	13.0476	1.62498	0.110704	0.735296	1.16986	1.7836	0.0766425	1.62498	0.911069		---	---	---	---	---	---	---	---	---	---	---	---	---	21515.9	109.559	65.3554	1426.76	476.051	7.457	444.89	7.0892	475.287	7.52149	1810.21	13.3606	586.786	36.4091	0.754233	1810.21	13.3606
TUNG-343	ESG11	2014-03-30, 22:43	5.42848e-05	4.15805	3.02202	0.0875058	2.9869	4.16174	3.02458	0.0867456	3.25649	2.87391	4.44441	0.240284	3.02458	0.680535		---	---	---	---	---	---	---	---	---	---	---	---	---	9294.17	30.9601	51.8515	128.734	1388.17	37.7735	1390.61	40.7416	1390.52	39.9186	1354.01	62.8086	1345.37	55.2137	-0.0270287	1354.01	62.8086
TUNG-344	ESG11	2014-03-30, 23:04	-8.74901e-06	5.4259	2.1053	0.103195	2.18593	5.4251	2.10541	0.103315	2.1895	2.62577	3.03754	0.184329	2.10541	0.69313		---	---	---	---	---	---	---	---	---	---	---	---	---	10634.3	173.285	56.7004	940.225	1090.58	21.124	1056.11	21.6167	1090.7	21.2954	1683.71	40.4172	1076.18	40.2869	0.372748	1683.71	40.4172
TUNG-345	ESG11	2014-03-30, 23:44	-3.6911e-05	24.9848	3.72045	0.0605739	4.12714	24.9679	3.7266	0.0611087	4.93926	0.33746	6.18739	0.0400514	3.7266	0.602289		---	---	---	---	---	---	---	---	---	---	---	---	---	10675.4	17.8872	18.5403	446.908	253.152	9.25112	250.088	9.22193	250.739	9.29944	642.128	106.19	624.933	99.9612	0.610532	642.128	106.19
TUNG-347	ESG11	2014-03-31, 00:23	-6.44986e-05	3.44915	1.20284	0.153828	0.541877	3.44558	1.20545	0.154659	0.677251	6.18893	1.38267	0.290227	1.20545	0.871827		---	---	---	---	---	---	---	---	---	---	---	---	---	8880.49	35.3628	60.2438	121.971	1642.66	17.4799	1542.76	18.0283	1631.84	18.9745	2397.35	11.5192	1806.92	60.3328	0.356473	2397.35	11.5192
TUNG-349	ESG11	2014-03-31, 01:19	-8.32211e-05	4.90383	2.31531	0.144145	1.28658	4.89695	2.31674	0.14523	1.34677	4.08913	2.67975	0.204209	2.31674	0.864536		---	---	---	---	---	---	---	---	---	---	---	---	---	8818.36	33.4474	60.8375	164.02	1197.89	25.3261	1108	24.8474	1164.44	26.8751	2289.75	23.166	1825.72	53.2657	0.516107	2289.75	23.166
TUNG-350	ESG11	2014-03-31, 01:39	-3.7513e-05	4.69353	2.93148	0.0875562	3.15253	4.6906	2.93395	0.0880813	3.33641	2.58915	4.44294	0.213192	2.93395	0.660363		---	---	---	---	---	---	---	---	---	---	---	---	---	8493.78	25.051	48.0745	117.577	1245.8	33.2364	1237.25	35.1533	1242.95	35.1955	1383.42	64.0884	1295.59	51.3771	0.105656	1383.42	64.0884
TUNG-351	ESG11	2014-03-31, 03:02	-1.85241e-05	12.2044	3.0437	0.130006	2.63387	12.2004	3.04444	0.130251	2.65567	1.47201	4.03995	0.0819647	3.04444	0.753584		---	---	---	---	---	---	---	---	---	---	---	---	---	11254.4	56.3425	40.6818	687.628	507.839	14.8676	463.143	13.9551	503.559	15.0105	2100.59	46.6359	984.558	70.7814	0.779518	2100.59	46.6359
TUNG-353	ESG11	2014-03-31, 03:40	-4.33797e-05	5.57147	3.57135	0.0911275	2.16811	5.56736	3.57236	0.0917325	2.28263	2.27182	4.23936	0.179618	3.57236	0.842665		---	---	---	---	---	---	---	---	---	---	---	---	---	10955.3	33.2679	70.4472	185.351	1064.89	35.0657	1044.25	36.0307	1061.39	37.0631	1461.03	43.3843	1128.85	52.0104	0.285262	1461.03	43.3843
TUNG-354	ESG11	2014-03-31, 04:20	2.41732e-05	8.87952	3.74101	0.0872675	1.92213	8.88331	3.74167	0.0869283	2.03515	1.34923	4.25933	0.112571	3.74167	0.878464		---	---	---	---	---	---	---	---	---	---	---	---	---	10500.8	59.1751	38.3466	525.447	687.66	24.4051	667.685	24.3087	683.895	24.7026	1358.07	39.2301	1037.61	91.9755	0.508356	1358.07	39.2301
TUNG-355	ESG11	2014-03-31, 04:43	2.02839e-06	3.73248	1.11265	0.101222	1.56096	3.7326	1.11284	0.101194	1.57074	3.73804	1.925	0.26791	1.11284	0.578098		---	---	---	---	---	---	---	---	---	---	---	---	---	10126.6	166.546	51.6336	621.631	1530.18	15.1583	1519.77	16.581	1530.14	15.3206	1645.32	29.1376	1534	40.5709	0.0763077	1645.32	29.1376
TUNG-4.1	ESG11	2011-05-04, 19:01	2.09455e-05	3.00764	3.78114	0.157214	0.828377	3.00863	3.78128	0.156945	0.847598	7.19252	3.87511	0.332378	3.78128	0.975786		---	---	---	837.086	0.0133723	9.92186	0.667803	1.80557	0.50634	17.5714	80.662	159.822	288.737	9761	36.4645	60.9401	109.672	1849.9	60.8081	1758.01	64.991	1847.31	65.4658	2422.27	14.3798	1885.96	81.1955	0.27423	2422.27	14.3798	1.26684e+15
TUNG-5.2	ESG11	2012-01-22, 20:58	9.39365e-05	3.86564	3.33669	0.132848	2.60536	3.87245	3.33785	0.131611	2.67622	4.68605	4.27824	0.258235	3.33785	0.780191		---	---	---	938.46	0.0549482	12.336	0.888329	2.03779	0.613589	21.6714	86.5841	162.937	284.531	10462.5	39.1772	76.1201	151.445	1480.8	44.1609	1404.99	46.2138	1476.15	47.6118	2118.81	46.9007	1543.89	43.3984	0.336896	2118.81	46.9007	1.45435e+15
TUNG-6.1	ESG11	2011-05-04, 19:36	-2.03747e-05	7.41519	5.70057	0.119468	3.2737	7.41255	5.70068	0.119742	3.27305	2.22731	6.57348	0.134906	5.70068	0.867224		---	---	---	1053.69	0.138719	9.36948	0.697565	1.83167	0.66476	19.9391	94.0976	205.143	445.078	10050.9	33.5745	67.9256	248.961	815.794	43.6835	764.492	42.396	795.825	45.6856	1951.6	58.4717	1304.59	78.6381	0.608274	1951.6	58.4717	2065038531278246
TUNG-7.1	ESG11	2011-05-04, 19:56	6.50034e-05	4.28212	7.28998	0.0856893	10.0019	4.2867	7.29018	0.0847767	10.1347	2.72681	12.4843	0.23328	7.29018	0.583947		---	---	---	1208.28	0.0563764	14.2732	2.26547	3.48981	2.01455	26.1491	107.401	230.174	478.857	9128.32	39.1839	145.607	167.79	1351.67	88.8938	1354.51	96.0937	1337.97	102.673	1309.59	196.688	1458.91	161.241	-0.0343027	1354.51	96.0937	1.00653e+15
TUNG-8.2	ESG11	2011-05-04, 20:50	1e-32	6.56042	2.56827	0.0796215	5.88535	6.56042	2.56827	0.0796215	5.88535	1.6734	6.42132	0.152429	2.56827	0.39996		---	---	---	557.088	0.014856	26.6895	0.602759	1.35918	0.366017	11.7621	52.0547	100.936	194.024	10625.7	34.3821	102.098	225.561	914.567	21.8985	903.876	22.9702	914.918	23.4955	1186.77	116.244	909.364	35.4167	0.238372	1186.77	116.244	1.07734e+15

## Sheet: Info
This Supplemental Material accompanies Gottlieb, E.S., Miller, E.L., Valley, J.W.,
Fisher, C.M., Vervoort, J.D., and Kitajima, K., 2022, Zircon petrochronology of Cretaceous
Cordilleran interior granites of the Snake Range and Kern Mountains, Nevada, USA,
in Craddock, J.P., Malone, D.H., Foreman, B.Z., and Konstantinou, A., eds., Tectonic Evolution
of the Sevier-Laramide Hinterland, Thrust Belt, and Foreland, and Postorogenic Slab Rollback
(180–20 Ma): GSA Special Paper 555, https://doi.org/10.1130/2022.2555(02).
